# Supplementary material for: An olive parentage atlas: founder cultivars, regional diversification, and implications for breeding programs
Source: Research Square preprint supplement (doi:10.21203/rs.3.rs-8524821/v1), 2026-01-13
Supplement: Supplementary file 1 [file b30c82cdf247ff7dc90bd58d.xlsx]

## Sheet: Table S1
Denomination	Register number WOGBC (ESP046)	Origin	Source	Region of cultivation	A	B	C	GenePool (Q>0,75)	Cp DNA	Source CpDNA	Stigmatic Group; Androsterility	Source Stigmatic group; Androesterility
Abade Helo	1623	SYR	Belaj et al., 2022	EM	0.9998	9.999e-05	9.999e-05	A	E1.3	Khadari et al., 2019
Abade Mour	1615	SYR	Belaj et al., 2022	EM	0.969134	0.030766	9.9991e-05	A
Abadi Rassasi	1780	SYR	Belaj et al., 2022	EM	0.677189	0.1017	0.22111	ADMIX	E1.1	Besnard et al., 2013
Abbadi Abou Gabra-842	842	SYR	Belaj et al., 2022	EM	0.995856	0.00404417	9.9991e-05	A	E1.2; E.1	Besnard et al., 2013; Julca et al., 2020
Abbadi Shalal	1034	SYR	Belaj et al., 2022	EM	0.987129	0.0127714	9.9991e-05	A	E1.1	Besnard et al., 2013
Abo Akfa	1624	SYR	Belaj et al., 2022	EM	0.993659	0.00624097	9.9991e-05	A	E1.3	Besnard et al., 2013
Abo Anaked	1616	SYR	Belaj et al., 2022	EM	0.909458	0.0904423	9.9991e-05	A	E1.3	Besnard et al., 2013
Abo Shawke	1788	SYR	Belaj et al., 2022	EM	0.885101	0.0898383	0.0250609	A
Abou Choki-1115	1115	SYR	Belaj et al., 2022	EM	0.980832	9.9991e-05	0.0190675	A
Abou Kanani	840	SYR	Belaj et al., 2022	EM	0.991397	9.9991e-05	0.00850301	A	E1	Julca et al., 2020
Abou Satl Mohazam	1043	SYR	Belaj et al., 2022	EM	0.91892	0.0809804	9.9991e-05	A	E1	Julca et al., 2020	G1	Mariotti et al., 2020
Abunara	1324	ITA	Belaj et al., 2022	CM	0.45323	9.9991e-05	0.54667	ADMIX	E1.2	Besnard et al., 2013
Acebuche de Autol	2155	ESP	Belaj et al., 2022	WM	0.106093	0.240806	0.653101	ADMIX
Acebuche de Caravaca-800	800	ESP	Belaj et al., 2022	WM	0.0871418	0.569738	0.34312	ADMIX
Acebuchera	565	ESP	Belaj et al., 2022	WM	9.999e-05	9.999e-05	0.9998	C	E1.1	Besnard et al., 2013
Acebuchina de Frigiliana	2401	ESP	Gómez Gálvez et al., 2024	WM	0.0537767	0.946123	9.9991e-05	B
Aceitunero de Préjano	2022	ESP	Belaj et al., 2022	WM	0.406246	9.9991e-05	0.593654	ADMIX
Aceitunero-2249	2249	ESP	Belaj et al., 2022	WM	0.809774	9.9991e-05	0.190126	A
Aceituno de Alberite	2508	ESP	Gómez Gálvez et al., 2024	WM	0.476504	9.9991e-05	0.523396	ADMIX
Aeleh	1541	DZA	Belaj et al., 2022	CM	0.00208634	0.673754	0.324159	ADMIX	E2.1	Besnard et al., 2013
Agac no 7 (K. Maras)	2329	TUR	Belaj et al., 2022	EM	0.901821	9.9991e-05	0.0980795	A
Aggizi Akse	1738	EGY	Belaj et al., 2022	EM	0.727718	0.000308488	0.271974	ADMIX	E1.1	Besnard et al., 2013
Aggizi Oshime	1739	EGY	Belaj et al., 2022	EM	0.775868	0.186425	0.0377073	A	E1.2	Besnard et al., 2013
Aggizi Shame	1737	EGY	Belaj et al., 2022	EM	0.808934	0.12075	0.0703151	A	E1.1	Besnard et al., 2013
Aghchren de Titest	1525	DZA	Belaj et al., 2022	CM	0.757411	9.9991e-05	0.242489	A	E1.1	Besnard et al., 2013
Aglandau	1846	FRA	Belaj et al., 2022	WM	0.809242	9.9991e-05	0.190658	A	E1.1	Besnard et al., 2013	G2	Castric et al., 2024
Agouromanakolia	692	GRC	Belaj et al., 2022	CM	0.950717	9.9991e-05	0.0491832	A	E1.1	Mariotti et al., 2023
Aharoune	1543	DZA	Belaj et al., 2022	CM	0.338455	0.210488	0.451057	ADMIX	E3.2	Besnard et al., 2013
Ahia-Ousbaa	1638	DZA	Belaj et al., 2022	CM	0.582136	0.417764	9.9991e-05	ADMIX	E2.1	Besnard et al., 2013
Aimel	1529	DZA	Belaj et al., 2022	CM	9.9991e-05	0.913549	0.0863512	B	E1.1	Besnard et al., 2013
Aitana	1325	ITA	Belaj et al., 2022	CM	0.903581	0.0943972	0.00202183	A	E1.1	Besnard et al., 2013
Aixalà	#N/A	ESP	Gómez Gálvez et al., 2024	WM	0.505985	0.493915	9.9991e-05	ADMIX			G1	Castric et al., 2024
Ak Zeytin	2363	TUR	Belaj et al., 2022	EM	0.802979	0.196921	9.9991e-05	A
Akenane	1951	DZA	Belaj et al., 2022	CM	0.237732	0.38698	0.375288	ADMIX	E1.1	Besnard et al., 2013
Akerma	1516	DZA	Belaj et al., 2022	CM	0.599397	9.9991e-05	0.400503	ADMIX	E1.1	Besnard et al., 2013
Alameño Blanco	284	ESP	Belaj et al., 2022	WM	9.9991e-05	0.048749	0.951151	C	E1.1	Besnard et al., 2013
Alameño de Cabra	285	ESP	Belaj et al., 2022	WM	9.9991e-05	0.0405168	0.959383	C	E1.1	Besnard et al., 2013
Alameño de Montilla	39	ESP	Belaj et al., 2022	WM	0.0469595	9.9991e-05	0.952941	C	E1.1	Besnard et al., 2013
Albacarro	#N/A	ESP	Gómez Gálvez et al., 2024	WM	0.448792	9.9991e-05	0.551108	ADMIX
Albareta	2042	ESP	Belaj et al., 2022	WM	0.7434	9.9991e-05	0.2565	ADMIX
Albas	2246	ESP	Belaj et al., 2022	WM	0.259901	0.135438	0.604661	ADMIX
Albatro	1187	ITA	Belaj et al., 2022	CM	0.307926	0.258796	0.433278	ADMIX	E1.1	Besnard et al., 2013
Alfafara	605	ESP	Belaj et al., 2022	WM	0.00586739	9.9991e-05	0.994033	C	E1.1	Besnard et al., 2013
Alfredico	2469	ESP	Gómez Gálvez et al., 2024	WM	0.131202	9.9991e-05	0.868698	C
Alía	2041	ESP	Belaj et al., 2022	WM	0.590511	9.9991e-05	0.409389	ADMIX
Allora	1188	ITA	Belaj et al., 2022	CM	0.328328	0.531043	0.140628	ADMIX	E1.1	Besnard et al., 2013
Aloreña	2283	ESP	Belaj et al., 2022	WM	0.424158	9.9991e-05	0.575742	ADMIX
Aloreña de Iznalloz	778	ESP	Belaj et al., 2022	WM	9.9991e-05	0.00825963	0.99164	C	E1.1	Besnard et al., 2013
Aloreña-829	829	ARG	Belaj et al., 2022	WM	0.288048	0.101169	0.610783	ADMIX
Alquecerana	#N/A	ESP	Gómez Gálvez et al., 2024	WM	0.642886	0.235211	0.121903	ADMIX
Amargoso	367	ESP	Belaj et al., 2022	WM	0.539027	9.9991e-05	0.460873	ADMIX	E1.1	Besnard et al., 2013
Americano	1189	ITA	Belaj et al., 2022	CM	0.445544	0.454588	0.0998673	ADMIX	E1.1	Besnard et al., 2013
Ampolleta	2181	ESP	Belaj et al., 2022	WM	0.190857	0.623686	0.185458	ADMIX			Androesterility	Field observation
Amygdalolia Nana	228	GRC	Belaj et al., 2022	CM	0.571017	9.9991e-05	0.428883	ADMIX	E1.2	Besnard et al., 2013	G2	Castric et al., 2024; Raimondeau et al., 2024
Araban	2230	FRA	Belaj et al., 2022	WM	0.386276	0.257965	0.355759	ADMIX	E1.1	Khadari et al., 2019
Arabi Altafeleh	2261	JOR	Belaj et al., 2022	EM	0.370766	0.273851	0.355383	ADMIX
Arbequí Blanc	1717	ESP	Belaj et al., 2022	WM	0.480209	0.446305	0.0734859	ADMIX			G1	Castric et al., 2024
Arbequina	231	ESP	Belaj et al., 2022	WM	0.354721	0.611333	0.0339462	ADMIX	E1.1	Besnard et al., 2013	G1	Mariotti et al., 2020; Raimondeau et al., 2024
Arbosana	666	ESP	Belaj et al., 2022	WM	0.158282	0.620154	0.221564	ADMIX	E1.1	Besnard et al., 2013	G2	Mariotti et al., 2020
Arboset	#N/A	ESP	Gómez Gálvez et al., 2024	WM	0.595564	9.9991e-05	0.404336	ADMIX			G2	Castric et al., 2024
Argudell	1068	ESP	Belaj et al., 2022	WM	0.271301	0.120361	0.608338	ADMIX	E1.1	Besnard et al., 2013	G2	Castric et al., 2024
Arracada d'Aldover	645	ESP	Belaj et al., 2022	WM	0.420801	0.280309	0.29889	ADMIX			G2; Androesterility	Castric et al., 2024; Rojas-Gómez et al., 2023
Arroniz	994	ESP	Belaj et al., 2022	WM	0.418488	9.9991e-05	0.581412	ADMIX
Ascolana Huasco	1455	CHL	Belaj et al., 2022	WM	0.341232	0.303693	0.355074	ADMIX
Ascolana Tenera	62	ITA	Belaj et al., 2022	CM	0.585557	0.0209258	0.393517	ADMIX	E1.1	Besnard et al., 2013
Ashrasse	2279	IRQ	Belaj et al., 2022	EM	0.876399	0.123501	9.9991e-05	A
Asnal	437	ESP	Belaj et al., 2022	WM	9.9991e-05	0.00608025	0.99382	C	E1.1	Besnard et al., 2013
Ayrouni-1599	1599	SYR	Belaj et al., 2022	EM	0.930379	9.9991e-05	0.069521	A
Ayvalik	97	TUR	Belaj et al., 2022	EM	0.760587	0.173913	0.0654999	A	E1.1	Besnard et al., 2013
Azapa	726	CHL	Belaj et al., 2022	WM	9.999e-05	9.999e-05	0.9998	C	E1.1	Besnard et al., 2013
Azeboudi de Kirane-1549	1549	DZA	Belaj et al., 2022	CM	0.385678	0.614222	9.9991e-05	ADMIX	E2.1	Khadari et al., 2019
Azeboudi de Kirane-1659	1659	DZA	Belaj et al., 2022	CM	0.0261208	0.447897	0.525982	ADMIX	E2.1	Khadari et al., 2019
Azeradj	1530	DZA	Belaj et al., 2022	CM	0.556893	0.0141669	0.42894	ADMIX	E1.1	Besnard et al., 2013
Azul	343	ESP	Belaj et al., 2022	WM	9.999e-05	9.999e-05	0.9998	C	E1.1	Besnard et al., 2013
Baid El Hamam	1748	EGY	Belaj et al., 2022	EM	0.845238	0.153702	0.00105924	A	E1.1	Besnard et al., 2013
Baladi	133	LBN	Belaj et al., 2022	EM	0.839484	0.0215472	0.138969	A	E1.1	Besnard et al., 2013	G2	Mariotti et al., 2020
Baladi Hermel-2072	2072	LBN	Belaj et al., 2022	EM	0.879786	0.109462	0.0107524	A
Baladi Hermel-2074	2074	LBN	Belaj et al., 2022	EM	0.791767	0.0258238	0.182409	A
Baladi Remadieh-2082	2082	LBN	Belaj et al., 2022	EM	0.677404	0.167448	0.155148	ADMIX
Balady	1744	EGY	Belaj et al., 2022	EM	0.734551	0.149336	0.116112	ADMIX	E1.2	Besnard et al., 2013
Balhi Sig	1916	TUN	Belaj et al., 2022	CM	9.9991e-05	0.720931	0.278969	ADMIX
Barnea	711	ISR	Belaj et al., 2022	EM	0.285659	0.22649	0.487851	ADMIX	E1.1	Besnard et al., 2013	G1	Mariotti et al., 2020
Barouni	1661	TUN	Belaj et al., 2022	CM	0.0450656	9.9991e-05	0.954834	C	E1.1	Besnard et al., 2013
Barri	1026	SYR	Belaj et al., 2022	EM	0.851782	0.148118	9.9991e-05	A	E1	Julca et al., 2020
Bassiols	#N/A	ESP	Gómez Gálvez et al., 2024	WM	0.774797	0.14347	0.0817334	A
Bathni	1808	JOR	Belaj et al., 2022	EM	0.901241	0.0853086	0.0134501	A
Becarut	#N/A	ESP	Gómez Gálvez et al., 2024	WM	0.512377	0.230006	0.257616	ADMIX			G2	Castric et al., 2024
Béchude	2219	FRA	Belaj et al., 2022	WM	0.120058	0.573724	0.306218	ADMIX	E2.1	Khadari et al., 2019
Bed al Igel	1561	SYR	Belaj et al., 2022	EM	0.815194	9.9991e-05	0.184706	A	E1.3	Khadari et al., 2019; El Bakkali et al.,2019
Belluti	690	TUR	Belaj et al., 2022	EM	0.766572	0.233328	9.9991e-05	A	E1.1	Besnard et al., 2013
Bent al Kadi	1029	SYR	Belaj et al., 2022	EM	0.859915	9.9991e-05	0.139985	A	E1.3	Besnard et al., 2013
Berri Meslal_3	1927	MAR	Belaj et al., 2022	WM	0.0876761	0.520735	0.391589	ADMIX	E3.3	Besnard et al., 2013
Bez el Anza	1753	EGY	Belaj et al., 2022	EM	0.28673	0.262343	0.450927	ADMIX	E1.1	Besnard et al., 2013
Bianchera	1247	ITA	Belaj et al., 2022	CM	0.449094	0.0510948	0.499812	ADMIX	E1.1	Besnard et al., 2013
Biancolilla-1814	1814	ARG	Belaj et al., 2022	WM	0.606834	0.0769953	0.316171	ADMIX
Bical	387	ESP	Belaj et al., 2022	WM	0.0977338	0.0218558	0.88041	C	E1.1	Besnard et al., 2013
Bidh Hmam	1917	TUN	Belaj et al., 2022	CM	0.572125	9.9991e-05	0.427775	ADMIX
Biequeruda	2242	ESP	Belaj et al., 2022	WM	0.339177	0.0968538	0.56397	ADMIX
Bigarude	67	FRA	Belaj et al., 2022	WM	0.475661	0.0456407	0.478698	ADMIX
Blanc	#N/A	ESP	Gómez Gálvez et al., 2024	WM	0.158109	0.0928563	0.749034	ADMIX			G2	Castric et al., 2024
Blanqueta	11	ESP	Belaj et al., 2022	WM	0.442039	0.493199	0.0647625	ADMIX	E1.3	Besnard et al., 2013
Blanquillo de Setenil	2515	ESP	Gómez Gálvez et al., 2024	WM	0.00888811	0.000916297	0.990196	C
Blanquillo fino	#N/A	ESP	Gómez Gálvez et al., 2024	WM	9.9991e-05	0.0641928	0.935707	C
Bodoquera	631	ESP	Belaj et al., 2022	WM	0.513583	9.9991e-05	0.486317	ADMIX
Bolvino	46	ESP	Belaj et al., 2022	WM	0.984537	9.9991e-05	0.0153634	A	E1.1	Besnard et al., 2013
Borriolenca	41	ESP	Belaj et al., 2022	WM	0.518335	0.481565	9.9991e-05	ADMIX	E3.1	Besnard et al., 2013	Androesterility	Rojas-Gómez et al., 2023
Bosana	1170	ITA	Belaj et al., 2022	CM	0.459328	0.540572	9.9991e-05	ADMIX	E1.1	Besnard et al., 2013	G2	Mariotti et al., 2020
Bottone di Gallo	1327	ITA	Belaj et al., 2022	CM	0.00366415	0.996236	9.9991e-05	B	E1.1	Khadari et al., 2019	G2	Mariotti et al., 2020
Bouchouika	1937	MAR	Belaj et al., 2022	WM	0.0725205	9.9991e-05	0.92738	C	E1.1	Besnard et al., 2013
Bouchouk Lafayette	1542	DZA	Belaj et al., 2022	CM	0.622242	9.9991e-05	0.377658	ADMIX	E1.1	Besnard et al., 2013
Boughenfous	1518	DZA	Belaj et al., 2022	CM	0.0452985	0.784202	0.170499	B
Bouricha	1655	DZA	Belaj et al., 2022	CM	9.9991e-05	0.996634	0.00326623	B	E3.3	Besnard et al., 2013
Bouteillan	63	FRA	Belaj et al., 2022	WM	0.70119	9.9991e-05	0.29871	ADMIX	E1.1	Besnard et al., 2013	G2	Mariotti et al., 2020
Brandofino	1328	ITA	Belaj et al., 2022	CM	0.702406	9.9991e-05	0.297494	ADMIX	E1.1	Besnard et al., 2013
Brava	2276	ESP	Belaj et al., 2022	WM	0.0546516	0.0876526	0.857696	C
Buga	733	HRV	Belaj et al., 2022	CM	0.423636	0.117619	0.458745	ADMIX	E1.1	Besnard et al., 2013
Buharica	2387	HRV	Belaj et al., 2022	CM	0.43903	9.9991e-05	0.56087	ADMIX
Buidiego	255	ESP	Belaj et al., 2022	WM	9.999e-05	9.999e-05	0.9998	C	E1.1	Mariotti et al., 2023
Butko	2295	TUR	Belaj et al., 2022	EM	0.744623	9.9991e-05	0.255277	ADMIX
Buyuk Topak Ulak	2318	TUR	Belaj et al., 2022	EM	0.717544	9.9991e-05	0.282356	ADMIX
Buža	1987	HRV	Belaj et al., 2022	CM	0.478225	9.9991e-05	0.521675	ADMIX
Caballo	333	ESP	Belaj et al., 2022	WM	9.9991e-05	0.0470929	0.952807	C	E1.1	Besnard et al., 2013
Cairo_7	1094	EGY	Belaj et al., 2022	EM	0.0862725	0.37754	0.536188	ADMIX	E1.1	Besnard et al., 2013
Calatina	1329	ITA	Belaj et al., 2022	CM	0.182056	0.32906	0.488884	ADMIX	E1.1	Besnard et al., 2013
Calian	2222	FRA	Belaj et al., 2022	WM	0.639854	0.182501	0.177645	ADMIX
Calles_1	2171	ESP	Belaj et al., 2022	WM	0.212286	0.354653	0.433061	ADMIX
Callosina	60	ESP	Belaj et al., 2022	WM	9.9991e-05	0.00210791	0.997792	C	E1.1	Besnard et al., 2013
Canetera	653	ESP	Belaj et al., 2022	WM	0.268218	0.338795	0.392987	ADMIX	E3.1	Mariotti et al., 2023	Androesterility	Rojas-Gómez et al., 2023
Caninese	77	ITA	Belaj et al., 2022	CM	0.027997	0.953793	0.0182098	B	E2.N5	Mariotti et al., 2023	G2	Mariotti et al., 2020
Cañivano Negro	256	ESP	Belaj et al., 2022	WM	9.9991e-05	0.0488698	0.95103	C	E1.1	Besnard et al., 2013
Cañivano Negro-55	55	ESP	Belaj et al., 2022	WM	0.0828991	9.9991e-05	0.917001	C	E1.1	Besnard et al., 2013
Carolea	736	ITA	Belaj et al., 2022	CM	0.654384	9.9991e-05	0.345516	ADMIX	E1.2	Besnard et al., 2013	G2	Mariotti et al., 2020
Carrasco	2180	ESP	Belaj et al., 2022	WM	0.190382	0.412678	0.396939	ADMIX			Androesterility	Field observation
Carrasqueña de Cañada	1372	ESP	Belaj et al., 2022	WM	0.0254943	9.9991e-05	0.974406	C
Carrasqueña Huasco	1457	CHL	Belaj et al., 2022	WM	0.0465645	0.180719	0.772716	C
Carrasqueño de Alcaudete	332	ESP	Belaj et al., 2022	WM	0.050339	9.9991e-05	0.949561	C	E1.1	Khadari et al., 2019	G1	Mariotti et al., 2020
Carrasqueño de Elvas	125	PRT	Belaj et al., 2022	WM	9.999e-05	9.999e-05	0.9998	C
Carrasqueño de Jumilla	591	ESP	Belaj et al., 2022	WM	0.135161	9.9991e-05	0.864739	C	E1.1	Besnard et al., 2013	G1	Mariotti et al., 2020
Carrasqueño de la Sierra	286	ESP	Belaj et al., 2022	WM	0.0237813	9.9991e-05	0.976119	C	E1.1	Mariotti et al., 2023
Carrasqueño de Porcuna	795	ESP	Belaj et al., 2022	WM	9.999e-05	9.999e-05	0.9998	C
Carrasqueta de Ayora	2196	ESP	Belaj et al., 2022	WM	0.0820874	9.9991e-05	0.917813	C
Carrasquillo	785	ESP	Belaj et al., 2022	WM	9.9991e-05	0.0685778	0.931322	C	E1.1	Khadari et al., 2019
Carrelluda	#N/A	ESP	Gómez Gálvez et al., 2024	WM	0.936143	0.0637565	9.9991e-05	A
Casas	#N/A	ESP	Gómez Gálvez et al., 2024	WM	0.511334	0.442995	0.0456717	ADMIX			G1	Castric et al., 2024
Caspolina	2248	ESP	Belaj et al., 2022	WM	0.434927	0.315802	0.249271	ADMIX
Castellana	576	ESP	Belaj et al., 2022	WM	0.0298425	9.9991e-05	0.970057	C	E1.1	Besnard et al., 2013
Castiza de Cazorla	2486	ESP	Gómez Gálvez et al., 2024	WM	0.41826	0.084403	0.497337	ADMIX
Castriciana Rapparina	1331	ITA	Belaj et al., 2022	CM	0.42563	0.46859	0.10578	ADMIX	E1.1	Khadari et al., 2019
Cástula	2565	ESP	Validation control (seedling from known genitors)	WM	0.232892	0.603645	0.163463	ADMIX
Cavalieri	1332	ITA	Belaj et al., 2022	CM	0.249557	0.375254	0.375189	ADMIX	E1.1	Besnard et al., 2013
Cayet Noir	2228	FRA	Belaj et al., 2022	WM	0.351745	0.153903	0.494352	ADMIX
Cayet Roux	708	FRA	Belaj et al., 2022	WM	0.540991	0.437704	0.021305	ADMIX	E1.1	Khadari et al., 2019
Cayon	1848	FRA	Belaj et al., 2022	WM	0.255684	0.449064	0.295251	ADMIX	E2.1	Besnard et al., 2013
Cekiste	2364	TUR	Belaj et al., 2022	EM	0.493444	9.9991e-05	0.506456	ADMIX
Celebi (Iznik)	2317	TUR	Belaj et al., 2022	EM	0.68554	0.0779231	0.236537	ADMIX
Celeiriña	#N/A	ESP	Gómez Gálvez et al., 2024	WM	0.272548	9.9991e-05	0.727352	ADMIX
Cerezuela	349	ESP	Belaj et al., 2022	WM	0.111757	9.9991e-05	0.888143	C	E1.1	Besnard et al., 2013
Cerisier	2214	FRA	Belaj et al., 2022	WM	0.500548	0.18876	0.310691	ADMIX			G2	Castric et al., 2024
Cerruda de Liesa	2036	ESP	Belaj et al., 2022	WM	0.448391	9.9991e-05	0.551509	ADMIX
Cerruda de Olvena	2034	ESP	Belaj et al., 2022	WM	0.400308	9.9991e-05	0.599592	ADMIX
Chalkidikis	220	GRC	Belaj et al., 2022	CM	0.647046	9.9991e-05	0.352854	ADMIX	E1.1	Besnard et al., 2013
Changlot Real	15	ESP	Belaj et al., 2022	WM	0.151715	0.176857	0.671428	ADMIX	E1.1	Besnard et al., 2013
Chemlal de Kabylie	118	DZA	Belaj et al., 2022	CM	9.9991e-05	0.641352	0.358548	ADMIX	E3.2	Besnard et al., 2013	Androesterility	Besnard et al., 2000; Rojas-Gómez et al., 2023
Chemlali Balhi	1827	TUN	Belaj et al., 2022	CM	0.203401	0.796499	9.9991e-05	B
Chemlali Ghraiba	1912	TUN	Belaj et al., 2022	CM	0.0589837	0.868377	0.0726394	B
Chemlali Meliane	1910	TUN	Belaj et al., 2022	CM	0.231414	0.768486	9.9991e-05	B
Chemlali Ontha Tataouine	1899	TUN	Belaj et al., 2022	CM	0.0266578	0.973242	9.9991e-05	B			Androesterility	Filed observation
Chemlali Ouled Msallem	1914	TUN	Belaj et al., 2022	CM	0.0371743	0.514653	0.448172	ADMIX
Chemlali Sfax	1871	TUN	Belaj et al., 2022	CM	9.999e-05	0.9998	9.999e-05	B	E1.1	Besnard et al., 2013
Chemlali Sig	1873	TUN	Belaj et al., 2022	CM	0.0395874	0.611504	0.348909	ADMIX
Chemlali Zarzis	1825	TUN	Belaj et al., 2022	CM	9.9991e-05	0.947087	0.0528128	B
Chetoui	113	TUN	Belaj et al., 2022	CM	0.474173	0.264852	0.260976	ADMIX	E1.2	Besnard et al., 2013
Chiquitita	1920	ESP	Belaj et al., 2022	WM	0.575415	0.221102	0.203483	ADMIX			G1	Cuevas et al., 2024
Chondrolia	2206	GRC	Belaj et al., 2022	CM	0.692587	0.206982	0.100432	ADMIX
Chorreao de Montefrio	402	ESP	Belaj et al., 2022	WM	0.245175	0.145802	0.609024	ADMIX
Chorrúo	29	ESP	Belaj et al., 2022	WM	0.128742	9.9991e-05	0.871158	C	E1.1	Khadari et al., 2019
Chorrúo de Castro del Río	361	ESP	Belaj et al., 2022	WM	0.00670674	9.9991e-05	0.993193	C
Cima di Melfi	1250	ITA	Belaj et al., 2022	CM	0.0801514	0.648277	0.271572	ADMIX	E1.1	Besnard et al., 2013
Cipresino	90	ITA	Belaj et al., 2022	CM	0.374323	0.320204	0.305473	ADMIX
Cirujal de Préjano	2153	ESP	Belaj et al., 2022	WM	0.346022	9.9991e-05	0.653878	ADMIX
Claramunt	#N/A	ESP	Gómez Gálvez et al., 2024	WM	0.938353	0.0615473	9.9991e-05	A			G1	Castric et al., 2024
Clota	#N/A	ESP	Gómez Gálvez et al., 2024	WM	0.235138	0.455768	0.309094	ADMIX
Cobrancosa	124	PRT	Belaj et al., 2022	WM	0.138847	9.9991e-05	0.861053	C	E1.1	Besnard et al., 2013
Colomar	#N/A	ESP	Gómez Gálvez et al., 2024	WM	0.889188	9.9991e-05	0.110712	A
Coratina	79	ITA	Belaj et al., 2022	CM	9.9991e-05	0.525256	0.474644	ADMIX	E1.1	Besnard et al., 2013	G2	Mariotti et al., 2020
Corbella	817	ESP	Belaj et al., 2022	WM	0.214469	0.577886	0.207645	ADMIX	E3.1	Besnard et al., 2013	G2; Androesterility	Besnard et al., 2000; Castric et al., 2024
Corberana	#N/A	ESP	Gómez Gálvez et al., 2024	WM	0.307176	0.210233	0.482591	ADMIX			G1	Castric et al., 2024
Cordobés de Cornago	#N/A	ESP	Gómez Gálvez et al., 2024	WM	0.784166	9.9991e-05	0.215734	A
Cordovil de Serpa	130	PRT	Belaj et al., 2022	WM	9.9991e-05	0.045186	0.954714	C	E1.1	Besnard et al., 2013
Cornezuelo de Jaén	20	ESP	Belaj et al., 2022	WM	0.423954	0.0352445	0.540801	ADMIX	E1.1	Besnard et al., 2013	G1	Mariotti et al., 2020
Cornicabra	10	ESP	Belaj et al., 2022	WM	0.0400691	9.9991e-05	0.959831	C	E1.1	Besnard et al., 2013	G1	Mariotti et al., 2020
Cornicabra de Jerez Caballeros	957	ESP	Belaj et al., 2022	WM	9.9991e-05	0.0208053	0.979095	C
Cornicabra de Mérida	522	ESP	Belaj et al., 2022	WM	0.0191859	0.324755	0.656059	ADMIX
Corralones de Andújar	790	ESP	Belaj et al., 2022	WM	0.00397326	9.9991e-05	0.995927	C
Crastu	1334	ITA	Belaj et al., 2022	CM	0.315018	0.475724	0.209258	ADMIX	E2.2	Besnard et al., 2013
Crnica	734	HRV	Belaj et al., 2022	CM	0.263924	0.280478	0.455597	ADMIX	E1.1	Besnard et al., 2013
Cua de cirera	#N/A	ESP	Gómez Gálvez et al., 2024	WM	0.331185	0.334109	0.334706	ADMIX
Cucca	1193	ITA	Belaj et al., 2022	CM	0.333116	0.323313	0.343571	ADMIX	E1.1	Besnard et al., 2013
Cuoricino	1194	ITA	Belaj et al., 2022	CM	0.666896	0.300007	0.0330976	ADMIX	E1.1	Besnard et al., 2013
Cuquello de la Jana	1440	ESP	Belaj et al., 2022	WM	0.277361	0.42094	0.301699	ADMIX			Androesterility	Field observation
Cuquello_1	2189	ESP	Belaj et al., 2022	WM	0.188553	0.570179	0.241269	ADMIX
Curivell	1072	ESP	Belaj et al., 2022	WM	0.146467	0.48315	0.370384	ADMIX	E3.1	Khadari et al., 2019	G2; Androesterility	Castric et al., 2024; Rojas-Gómez et al., 2023
Curnet	2229	FRA	Belaj et al., 2022	WM	0.616482	0.323033	0.060485	ADMIX	E3.1	Khadari et al., 2019	G1; Androesterility	Besnard et al., 2000; Castric et al., 2024
D. de Egipto	1099	EGY	Belaj et al., 2022	EM	0.288347	0.422633	0.28902	ADMIX
Dahgan	2280	IRQ	Belaj et al., 2022	EM	0.664035	0.0997787	0.236186	ADMIX	E1.1	Mariotti et al., 2023
Datilera de Caudiel	2186	ESP	Belaj et al., 2022	WM	0.241913	0.638713	0.119373	ADMIX
Datilero	403	ESP	Belaj et al., 2022	WM	0.0398027	0.0189206	0.941277	C	E1.1	Besnard et al., 2013
De Sal	420	ESP	Belaj et al., 2022	WM	0.130051	9.9991e-05	0.869849	C
Delle	1609	SYR	Belaj et al., 2022	EM	0.886919	0.112981	9.9991e-05	A	E1.1	Besnard et al., 2013
Derdi	1634	DZA	Belaj et al., 2022	CM	0.0459561	0.349948	0.604096	ADMIX
Desconocida de Fuente Santa	#N/A	ESP	Gómez Gálvez et al., 2024	WM	0.419773	0.203208	0.377019	ADMIX
Desconocida-1481	1481	ESP	Belaj et al., 2022	WM	0.141227	9.9991e-05	0.858673	C
Desconocido de Alberite	#N/A	ESP	Gómez Gálvez et al., 2024	WM	0.496365	9.9991e-05	0.503535	ADMIX
Desconocido de Alcanadre_1	#N/A	ESP	Gómez Gálvez et al., 2024	WM	0.00351243	0.394529	0.601959	ADMIX
Desconocido de Alcanadre-2505	2505	ESP	Gómez Gálvez et al., 2024	WM	9.9991e-05	0.593648	0.406252	ADMIX
Desconocido de Alcanadre-2507	2507	ESP	Gómez Gálvez et al., 2024	WM	0.64386	0.205614	0.150526	ADMIX
Desconocido de Arnedo	#N/A	ESP	Gómez Gálvez et al., 2024	WM	0.595414	0.324592	0.0799937	ADMIX
Desconocido de Ausejo	#N/A	ESP	Gómez Gálvez et al., 2024	WM	0.444074	9.9991e-05	0.555826	ADMIX
Desconocido de Barranco Gracia	#N/A	ESP	Gómez Gálvez et al., 2024	WM	9.9991e-05	0.0308037	0.969096	C
Desconocido de Calahorra	#N/A	ESP	Gómez Gálvez et al., 2024	WM	0.322936	0.320033	0.357031	ADMIX
Desconocido de Casarias	2407	ESP	Gómez Gálvez et al., 2024	WM	0.0303359	0.905263	0.0644009	B
Desconocido de Clavijo_1	#N/A	ESP	Gómez Gálvez et al., 2024	WM	0.40025	9.9991e-05	0.59965	ADMIX
Desconocido de Clavijo_2	#N/A	ESP	Gómez Gálvez et al., 2024	WM	0.383649	0.0415598	0.574792	ADMIX
Desconocido de Clavijo_3	#N/A	ESP	Gómez Gálvez et al., 2024	WM	0.545912	9.9991e-05	0.453988	ADMIX
Desconocido de Clavijo_4	#N/A	ESP	Gómez Gálvez et al., 2024	WM	0.552751	0.0251758	0.422073	ADMIX
Desconocido de Cornago	#N/A	ESP	Gómez Gálvez et al., 2024	WM	0.759755	0.217687	0.0225587	A
Desconocido de Cortija de la Viana	#N/A	ESP	Gómez Gálvez et al., 2024	WM	0.0203299	0.787535	0.192135	B
Desconocido de Cortijo Fraile-2602	2602	ESP	Gómez Gálvez et al., 2024	WM	9.9991e-05	0.0120769	0.987823	C
Desconocido de Cútar	2452	ESP	Gómez Gálvez et al., 2024	WM	0.369982	0.470361	0.159657	ADMIX
Desconocido de Écija	#N/A	ESP	Gómez Gálvez et al., 2024	WM	0.414481	0.357716	0.227804	ADMIX
Desconocido de El Patriarca_1	#N/A	ESP	Gómez Gálvez et al., 2024	WM	0.00930571	0.655532	0.335163	ADMIX
Desconocido de El Patriarca_2	#N/A	ESP	Gómez Gálvez et al., 2024	WM	0.0748871	0.535912	0.389201	ADMIX
Desconocido de El Patriarca_3	#N/A	ESP	Gómez Gálvez et al., 2024	WM	0.106076	0.864394	0.0295303	B
Desconocido de El Patriarca_4	#N/A	ESP	Gómez Gálvez et al., 2024	WM	0.183652	0.42117	0.395178	ADMIX
Desconocido de El Patriarca_5	#N/A	ESP	Gómez Gálvez et al., 2024	WM	9.9991e-05	0.713181	0.286719	ADMIX
Desconocido de El Patriarca_6	#N/A	ESP	Gómez Gálvez et al., 2024	WM	9.9991e-05	0.424126	0.575774	ADMIX
Desconocido de Ibiza_1	#N/A	ESP	Gómez Gálvez et al., 2024	WM	0.0143562	0.929479	0.0561649	B
Desconocido de Ibiza_2	#N/A	ESP	Gómez Gálvez et al., 2024	WM	0.0456148	0.954285	9.9991e-05	B
Desconocido de Ibiza_3	#N/A	ESP	Gómez Gálvez et al., 2024	WM	0.0575306	0.915509	0.0269605	B
Desconocido de Jabalcuz	2490	ESP	Gómez Gálvez et al., 2024	WM	0.316325	0.115024	0.568651	ADMIX
Desconocido de la Albaida	2584	ESP	Gómez Gálvez et al., 2024	WM	9.9991e-05	0.295418	0.704482	ADMIX
Desconocido de La Carolina	#N/A	ESP	Gómez Gálvez et al., 2024	WM	0.187929	0.279819	0.532252	ADMIX
Desconocido de la Machuca	2446	ESP	Gómez Gálvez et al., 2024	WM	0.0860403	9.9991e-05	0.91386	C
Desconocido de Logroño	#N/A	ESP	Gómez Gálvez et al., 2024	WM	0.124584	0.136303	0.739113	ADMIX
Desconocido de Prado Pitisco	#N/A	ESP	Gómez Gálvez et al., 2024	WM	0.215643	0.205835	0.578522	ADMIX
Desconocido de Quel-2021	2021	ESP	Belaj et al., 2022	WM	0.57403	0.405	0.0209704	ADMIX
Desconocido de Quel-2026	2026	ESP	Belaj et al., 2022	WM	0.493285	0.186078	0.320637	ADMIX
Desconocido de Ribafrecha_1	#N/A	ESP	Gómez Gálvez et al., 2024	WM	0.378946	0.0457397	0.575314	ADMIX
Desconocido de Ribafrecha-2510	2510	ESP	Gómez Gálvez et al., 2024	WM	0.382343	9.9991e-05	0.617557	ADMIX
Desconocido de Ribafrecha-2511	2511	ESP	Gómez Gálvez et al., 2024	WM	0.545441	9.9991e-05	0.454459	ADMIX
Desconocido de Santa Fe	#N/A	ESP	Gómez Gálvez et al., 2024	WM	9.999e-05	9.999e-05	0.9998	C
Desconocido de Sojuela_1	#N/A	ESP	Gómez Gálvez et al., 2024	WM	0.391501	0.00421419	0.604285	ADMIX
Desconocido de Sojuela_2	#N/A	ESP	Gómez Gálvez et al., 2024	WM	0.214649	0.242861	0.542489	ADMIX
Desconocido de Toledo_1	#N/A	ESP	Gómez Gálvez et al., 2024	WM	9.9991e-05	0.0933825	0.906517	C
Desconocido de Toledo_2	#N/A	ESP	Gómez Gálvez et al., 2024	WM	0.034178	9.9991e-05	0.965722	C
Desconocido de Tramaya	2484	ESP	Gómez Gálvez et al., 2024	WM	0.340258	0.206485	0.453256	ADMIX
Desconocido de Tudelilla	#N/A	ESP	Gómez Gálvez et al., 2024	WM	0.502705	0.221065	0.27623	ADMIX
Desconocido de Villamediana_1	#N/A	ESP	Gómez Gálvez et al., 2024	WM	0.342002	9.9991e-05	0.657898	ADMIX
Desconocido de Villamediana_2	#N/A	ESP	Gómez Gálvez et al., 2024	WM	0.411443	0.177594	0.410962	ADMIX
Desconocido de Zute	#N/A	ESP	Gómez Gálvez et al., 2024	WM	0.139724	0.684193	0.176083	ADMIX
Desconocido del Cortijo de Don Pedro	2419	ESP	Gómez Gálvez et al., 2024	WM	0.0421934	0.275418	0.682388	ADMIX
Dezfool	1853	IRN	Belaj et al., 2022	EM	0.780471	0.137181	0.0823478	A	E1.1	Mariotti et al., 2023
Dhokkar Nafti	1898	TUN	Belaj et al., 2022	CM	9.999e-05	0.9998	9.999e-05	B
Dhokkar Tataouine	1511	TUN	Belaj et al., 2022	CM	9.9991e-05	0.739245	0.260655	ADMIX
Djabali Kini	2057	SYR	Belaj et al., 2022	EM	0.754675	0.0667613	0.178563	A	E1.2	Besnard et al., 2013
Doebli	1044	SYR	Belaj et al., 2022	EM	0.9998	9.999e-05	9.999e-05	A	E1.3	Khadari et al., 2019
Dokkar	539	TUN	Belaj et al., 2022	CM	9.999e-05	0.9998	9.999e-05	B	E3	Julca et al., 2020
Dolça	2017	ESP	Belaj et al., 2022	WM	0.270585	0.160301	0.569115	ADMIX			G2	Castric et al., 2024
Dolce	724	EGY	Belaj et al., 2022	EM	0.268736	0.293199	0.438064	ADMIX	E1.1	Mariotti et al., 2023
Dolce Agogia	65	ITA	Belaj et al., 2022	CM	0.231598	0.573349	0.195053	ADMIX	E1.1	Besnard et al., 2013	G2	Mariotti et al., 2020
Domat	94	TUR	Belaj et al., 2022	EM	0.810037	0.140891	0.0490724	A	E1.1	Besnard et al., 2013
Domengues	#N/A	ESP	Gómez Gálvez et al., 2024	WM	0.966306	0.033594	9.9991e-05	A
Dopia Pierias	2234	GRC	Belaj et al., 2022	CM	0.656893	9.9991e-05	0.343007	ADMIX
Dopia Verias	2238	GRC	Belaj et al., 2022	CM	0.790875	9.9991e-05	0.209025	A
Dulzal de Carmona	31	ESP	Belaj et al., 2022	WM	9.9991e-05	0.0920483	0.907852	C	E1.1	Khadari et al., 2019
Dwarf D	707	USA	Belaj et al., 2022	WM	0.323508	9.9991e-05	0.676392	ADMIX
Edincik	2311	TUR	Belaj et al., 2022	EM	0.741299	0.0668515	0.191849	ADMIX
Egriburum (Nizip)	2338	TUR	Belaj et al., 2022	EM	0.957825	9.9991e-05	0.0420752	A
Egriburum (Tatayn)	2340	TUR	Belaj et al., 2022	EM	0.914031	9.9991e-05	0.0858688	A
El Chatan	1849	DZA	Belaj et al., 2022	CM	9.9991e-05	0.983954	0.0159458	B
El Kharfi	1850	DZA	Belaj et al., 2022	CM	9.9991e-05	0.924956	0.0749443	B
El Salam	1745	EGY	Belaj et al., 2022	EM	0.283788	0.297495	0.418717	ADMIX	E1.1	Besnard et al., 2013
Elmacik	686	TUR	Belaj et al., 2022	EM	0.796984	9.9991e-05	0.202916	A	E1.2	Mariotti et al., 2023
Emilia	1195	ITA	Belaj et al., 2022	CM	0.42873	0.258827	0.312443	ADMIX	E1.1	Besnard et al., 2013
Empeltre	13	ESP	Belaj et al., 2022	WM	0.364114	0.479053	0.156833	ADMIX	E1.1	Besnard et al., 2013	G1	Castric et al., 2024
Ensasi	1124	SYR	Belaj et al., 2022	EM	0.803234	0.0220932	0.174672	A
Escarabajillo	779	ESP	Belaj et al., 2022	WM	9.9991e-05	0.075229	0.924671	C
Escarabajo	1720	ESP	Belaj et al., 2022	WM	9.999e-05	9.999e-05	0.9998	C
Escarabajuelo de Atarfe	408	ESP	Belaj et al., 2022	WM	9.9991e-05	0.0494974	0.950403	C
Escarabajuelo de Posadas	293	ESP	Belaj et al., 2022	WM	9.9991e-05	0.0196439	0.980256	C	E1.1	Besnard et al., 2013
Faresana	1253	ITA	Belaj et al., 2022	CM	0.298334	0.204103	0.497563	ADMIX
Farga	12	ESP	Belaj et al., 2022	WM	0.324548	0.503034	0.172418	ADMIX	E3.1	Besnard et al., 2013	G1; Androesterility	Castric et al., 2024; Rojas-Gómez et al., 2023
Farga Mora	#N/A	ESP	Gómez Gálvez et al., 2024	WM	0.301193	0.618572	0.0802344	ADMIX			G1	Castric et al., 2024
Fasolina	1254	ITA	Belaj et al., 2022	CM	0.283186	0.525057	0.191757	ADMIX
Fasolona	1255	ITA	Belaj et al., 2022	CM	0.300029	0.245961	0.454009	ADMIX	E1.1	Besnard et al., 2013
Favolosa	2496	ITA	Belaj et al., 2022	CM	0.400332	0.269756	0.329912	ADMIX
Figueretes	822	ESP	Belaj et al., 2022	WM	0.491937	0.419731	0.0883323	ADMIX			G1	Castric et al., 2024
Fishomi	1141	IRN	Belaj et al., 2022	EM	0.862846	0.137054	9.9991e-05	A	E1; E1.1	Julca et al., 2020; Mariotti et al., 2023
Fontllonga	#N/A	ESP	Gómez Gálvez et al., 2024	WM	0.888171	0.103819	0.0080101	A
Forastera de Tortosa	652	ESP	Belaj et al., 2022	WM	0.362606	0.337669	0.299725	ADMIX	E3	Julca et al., 2020
Fossenca	#N/A	ESP	Gómez Gálvez et al., 2024	WM	0.18394	0.544715	0.271345	ADMIX
Fouji Asli Gafsa	1675	TUN	Belaj et al., 2022	CM	0.83156	0.16834	9.9991e-05	A
Fram	1995	MNE	Belaj et al., 2022	CM	0.926958	0.0729421	9.9991e-05	A
Frantoio	80	ITA	Belaj et al., 2022	CM	0.129238	0.870662	9.9991e-05	B	E1.1	Besnard et al., 2013	G1	Mariotti et al., 2020; Raimondeau et al., 2024
Fulla de Salze	674	ESP	Belaj et al., 2022	WM	0.377557	0.523895	0.0985473	ADMIX	E3.1	Besnard et al., 2013	G2; Androesterility	Castric et al., 2024; Rojas-Gómez et al., 2023
Galatistas	2207	GRC	Belaj et al., 2022	CM	0.608911	0.0601246	0.330965	ADMIX
Galega Vulgar	128	PRT	Belaj et al., 2022	WM	9.9991e-05	0.208032	0.791868	C	E1.2	Besnard et al., 2013
Gaydoyrelia	695	GRC	Belaj et al., 2022	CM	0.73515	0.0973181	0.167532	ADMIX	E1.1	Besnard et al., 2013
Gemlik	92	TUR	Belaj et al., 2022	EM	0.735716	9.9991e-05	0.264184	ADMIX	E1.1	Besnard et al., 2013
Genovesa	970	ESP	Belaj et al., 2022	WM	0.524185	0.104222	0.371593	ADMIX
Gerboua	1725	TUN	Belaj et al., 2022	CM	0.638308	9.9991e-05	0.361592	ADMIX
Gerboui	538	TUN	Belaj et al., 2022	CM	0.914318	9.9991e-05	0.085582	A	E1.1	Besnard et al., 2013
Gerdeh	1854	IRN	Belaj et al., 2022	EM	0.846545	0.114319	0.0391366	A
Gileta	2199	ESP	Belaj et al., 2022	WM	0.431012	0.245694	0.323295	ADMIX
Godallera	#N/A	ESP	Gómez Gálvez et al., 2024	WM	0.536839	0.463061	9.9991e-05	ADMIX			G1	Castric et al., 2024
Gorda Limoncillo	1365	ESP	Belaj et al., 2022	WM	9.9991e-05	0.0449192	0.954981	C
Gordal de Granada	158	ESP	Belaj et al., 2022	WM	9.9991e-05	0.0407484	0.959152	C	E1.1	Besnard et al., 2013
Gordal de Hellín	567	ESP	Belaj et al., 2022	WM	0.011032	0.11	0.878968	C
Gordal de Somontano	2044	ESP	Belaj et al., 2022	WM	0.541938	0.0371114	0.42095	ADMIX
Gordal de Vélez Rubio	781	ESP	Belaj et al., 2022	WM	0.0895727	0.350484	0.559943	ADMIX
Gordal Sevillana	234	ESP	Belaj et al., 2022	WM	0.447061	0.108445	0.444494	ADMIX	E1.2	Besnard et al., 2013	G1	Mariotti et al., 2020
Gordilla de Cabo de Gata	2461	ESP	Gómez Gálvez et al., 2024	WM	0.039574	0.0271092	0.933317	C
Gorvele	2291	TUR	Belaj et al., 2022	EM	0.663352	9.9991e-05	0.336548	ADMIX
Grappolo	1201	ITA	Belaj et al., 2022	CM	0.114112	0.593287	0.292601	ADMIX	E1.1	Besnard et al., 2013	G1	Mariotti et al., 2020
Grassois	2210	FRA	Belaj et al., 2022	WM	0.129491	0.690754	0.179755	ADMIX	E1.1	Khadari et al., 2019	G1	Castric et al., 2024
Gremignolo di Bolgheri	1203	ITA	Belaj et al., 2022	CM	0.113142	0.429478	0.45738	ADMIX	E1.1	Besnard et al., 2013
Griseta	#N/A	ESP	Gómez Gálvez et al., 2024	WM	0.258412	0.701191	0.0403966	ADMIX			G2	Castric et al., 2024
Groginja	1994	MNE	Belaj et al., 2022	CM	0.300114	0.30658	0.393306	ADMIX
Grosal de Cieza	802	ESP	Belaj et al., 2022	WM	0.0454409	0.00731625	0.947243	C
Grosal Vimbodí	1069	ESP	Belaj et al., 2022	WM	0.767085	0.232815	9.9991e-05	A			G2	Castric et al., 2024
Grossal de Bovera	#N/A	ESP	Gómez Gálvez et al., 2024	WM	0.9998	9.999e-05	9.999e-05	A
Grossanne	1845	FRA	Belaj et al., 2022	WM	0.574771	9.9991e-05	0.425129	ADMIX	E1.1	Khadari et al., 2019
Habichuelero de Baena	295	ESP	Belaj et al., 2022	WM	9.9991e-05	0.099413	0.900487	C	E1.1	Besnard et al., 2013
Habichuelero de Grazalema	366	ESP	Belaj et al., 2022	WM	9.9991e-05	0.110849	0.889051	C	E1.1	Besnard et al., 2013
Halhali Celebi	2332	TUR	Belaj et al., 2022	EM	0.720597	0.279303	9.9991e-05	ADMIX
Hemblasi	1002	SYR	Belaj et al., 2022	EM	0.80162	0.19828	9.9991e-05	A
Hendero	2151	ESP	Belaj et al., 2022	WM	0.485579	9.9991e-05	0.514321	ADMIX
Hijarol de Bergasa	2157	ESP	Belaj et al., 2022	WM	0.698343	0.0559096	0.245747	ADMIX
Hojiblanca	2	ESP	Belaj et al., 2022	WM	9.999e-05	9.999e-05	0.9998	C	E1.1	Besnard et al., 2013	G1	Mariotti et al., 2020
Humaisi	1559	SYR	Belaj et al., 2022	EM	0.918696	9.9991e-05	0.0812045	A
Hursuki	2347	TUR	Belaj et al., 2022	EM	0.730581	0.18281	0.0866092	ADMIX
Idleb	1557	SYR	Belaj et al., 2022	EM	0.733971	0.196051	0.069978	ADMIX	E1.2	Besnard et al., 2013
Ifiri	1547	DZA	Belaj et al., 2022	CM	0.21054	0.482475	0.306985	ADMIX
Iliturgitana	2566	ESP	Validation control (seedling from a known genitor in open pollination)	WM	0.25078	0.288572	0.460649	ADMIX
Imperial	297	ESP	Belaj et al., 2022	WM	0.457296	0.19561	0.347093	ADMIX
Imperial de Jaén	30	ESP	Belaj et al., 2022	WM	9.9991e-05	0.059559	0.940341	C
Injassi Gafsa	1889	TUN	Belaj et al., 2022	CM	0.745595	0.254305	9.9991e-05	ADMIX
Injassi Hchichina	1893	TUN	Belaj et al., 2022	CM	0.211295	0.788605	9.9991e-05	B
Iri Yuvarlak	2343	TUR	Belaj et al., 2022	EM	0.949343	0.0279367	0.0227207	A
Itrana	68	ITA	Belaj et al., 2022	CM	0.420862	9.9991e-05	0.579038	ADMIX	E1.1	Besnard et al., 2013	G2	Mariotti et al., 2020
Izmir Sofralik	99	TUR	Belaj et al., 2022	EM	0.743034	9.9991e-05	0.256866	ADMIX	E1.1	Mariotti et al., 2023
Jabali	1118	SYR	Belaj et al., 2022	EM	0.687275	9.9991e-05	0.312625	ADMIX	E1	Julca et al., 2020
Jabaluna	392	ESP	Belaj et al., 2022	WM	0.260539	0.0416685	0.697792	ADMIX	E1.1	Besnard et al., 2013	G1	Mariotti et al., 2020
Janude_1	1602	SYR	Belaj et al., 2022	EM	0.711136	0.115711	0.173153	ADMIX	E1.2	Khadari et al., 2019
Jaropo	23	ESP	Belaj et al., 2022	WM	9.9991e-05	0.167834	0.832066	C	E1.1	Besnard et al., 2013
Jeddari Chaal	1869	TUN	Belaj et al., 2022	CM	9.999e-05	0.9998	9.999e-05	B
Jemri Bouchouka	1908	TUN	Belaj et al., 2022	CM	0.809987	0.132483	0.0575298	A	E1.1	Besnard et al., 2013	G1	Mariotti et al., 2020
Jemri Dhokkar-1732	1732	TUN	Belaj et al., 2022	CM	9.999e-05	0.9998	9.999e-05	B
Jemri Dhokkar-1907	1907	TUN	Belaj et al., 2022	CM	0.354465	0.579888	0.0656472	ADMIX
Jlot	1004	SYR	Belaj et al., 2022	EM	0.9998	9.999e-05	9.999e-05	A	E1.1	Besnard et al., 2013
Jlot-841	841	SYR	Belaj et al., 2022	EM	0.958566	0.0413336	9.9991e-05	A
Joanenca	667	ESP	Belaj et al., 2022	WM	0.314402	0.681709	0.00388932	ADMIX			G2	Castric et al., 2024
Juca	1414	MEX	Belaj et al., 2022	WM	0.395419	0.324375	0.280207	ADMIX
Kadeshon	1972	ISR	Belaj et al., 2022	EM	0.448845	0.213811	0.337343	ADMIX
Kaissy	140	SYR	Belaj et al., 2022	EM	0.884767	9.9991e-05	0.115133	A	E1.1	Mariotti et al., 2023
Kalamon	105	GRC	Belaj et al., 2022	CM	0.39918	0.281158	0.319662	ADMIX	E1.1	Besnard et al., 2013	G2	Saumitou-Laprade et al., 2017
Kalinjot	1171	ALB	Belaj et al., 2022	CM	0.732961	0.129621	0.137418	ADMIX
Kallmet	1151	ALB	Belaj et al., 2022	CM	0.56225	0.402076	0.0356734	ADMIX
Kalokerida	691	GRC	Belaj et al., 2022	CM	9.9991e-05	0.271722	0.728178	ADMIX	E3.1	Besnard et al., 2013	G2; Androesterility	Besnard et al., 2000; Raimondeau et al., 2024
Kan Celebi	688	TUR	Belaj et al., 2022	EM	0.854508	0.145392	9.9991e-05	A	E1.2	Mariotti et al., 2023
Kara Yaprak	2365	TUR	Belaj et al., 2022	EM	0.406284	0.10957	0.484146	ADMIX
Karamani	1119	SYR	Belaj et al., 2022	EM	0.840479	9.9991e-05	0.159421	A	E1.10	Besnard et al., 2013
Karamani-1564	1564	SYR	Belaj et al., 2022	EM	0.825199	9.9991e-05	0.174701	A
Karbunčela	1986	HRV	Belaj et al., 2022	CM	0.54412	9.9991e-05	0.45578	ADMIX	E1.1	Khadari et al., 2019
Karme	1606	SYR	Belaj et al., 2022	EM	0.72681	0.118131	0.15506	ADMIX	E1.1	Khadari et al., 2019
Karydolia	2208	GRC	Belaj et al., 2022	CM	0.94087	0.04993	0.00920002	A	E1.1	Besnard et al., 2013
Kato Drys	848	CYP	Belaj et al., 2022	EM	0.950888	9.9991e-05	0.0490122	A	E1.1	Besnard et al., 2013
Kelb et Ter	145	SYR	Belaj et al., 2022	EM	0.934811	0.0183858	0.046803	A	E1.1	Besnard et al., 2013
Kerdi	1563	SYR	Belaj et al., 2022	EM	0.932263	0.0676373	9.9991e-05	A	E1.2	Khadari et al., 2019
Kfarzeta-2501	2501	SYR	Belaj et al., 2022	EM	0.804286	0.0814816	0.114232	A
Khadraia	1548	DZA	Belaj et al., 2022	CM	0.30461	0.631305	0.0640852	ADMIX	E2.1	Besnard et al., 2013
Khalkhali	1054	SYR	Belaj et al., 2022	EM	0.986882	9.9991e-05	0.0130182	A	E1.2	Khadari et al., 2019
Khalkhali-1595	1595	SYR	Belaj et al., 2022	EM	0.947898	0.00274268	0.0493593	A
Khashabi	1120	SYR	Belaj et al., 2022	EM	0.872859	0.0863855	0.0407555	A	E1.1	Besnard et al., 2013
Khnfse	1618	SYR	Belaj et al., 2022	EM	0.915734	0.0841657	9.9991e-05	A	E1.1	Khadari et al., 2019
Khuokhe	1613	SYR	Belaj et al., 2022	EM	0.886842	0.113058	9.9991e-05	A	E1.2; E1.1	Besnard et al., 2013; Khadari et al., 2019
Killin	1571	SYR	Belaj et al., 2022	EM	0.813943	0.0136801	0.172377	A	E1.2	Besnard et al., 2013
Kiraz	679	TUR	Belaj et al., 2022	EM	0.588924	0.218878	0.192198	ADMIX	E1.1	Mariotti et al., 2023
Klon_14-1081	1081	ALB	Belaj et al., 2022	CM	0.22085	0.601856	0.177294	ADMIX
Klon_14-1812	1812	ALB	Belaj et al., 2022	CM	0.229779	0.669989	0.100232	ADMIX	E1	Julca et al., 2020
Kokerrmadh Elbasani	1716	ALB	Belaj et al., 2022	CM	0.880554	0.119346	9.9991e-05	A
Kolybada	702	GRC	Belaj et al., 2022	CM	0.761819	0.0666006	0.17158	A	E1.1	Besnard et al., 2013
Konservolia	219	GRC	Belaj et al., 2022	CM	0.613267	9.9991e-05	0.386633	ADMIX	E1.1	Besnard et al., 2013
Koroneiki	218	GRC	Belaj et al., 2022	CM	0.0933616	0.865568	0.0410706	B	E1.1	Besnard et al., 2013	G1	Mariotti et al., 2020
Kosiem	1754	EGY	Belaj et al., 2022	EM	0.349468	0.285911	0.364621	ADMIX	E1.1	Besnard et al., 2013
Kosmača	1981	HRV	Belaj et al., 2022	CM	0.0795803	0.528803	0.391616	ADMIX
Kothreiki	1385	GRC	Belaj et al., 2022	CM	0.9998	9.999e-05	9.999e-05	A	E1.1	Besnard et al., 2013
Kotruvsi	1077	ALB	Belaj et al., 2022	CM	0.880004	0.119896	9.9991e-05	A
Koutsourelia	2227	GRC	Belaj et al., 2022	CM	0.373368	0.626532	9.9991e-05	ADMIX	E1.1	Besnard et al., 2013
Kusha	2270	ALB	Belaj et al., 2022	CM	0.547443	0.452457	9.9991e-05	ADMIX
Labeed	2278	IRQ	Belaj et al., 2022	EM	0.685719	0.097383	0.216898	ADMIX
Larga Rambleña	#N/A	ESP	Gómez Gálvez et al., 2024	WM	0.223313	0.344663	0.432024	ADMIX
Lastovka	704	HRV	Belaj et al., 2022	CM	0.394152	0.482592	0.123256	ADMIX	E1.1	Besnard et al., 2013
Lazzera Reale	1207	ITA	Belaj et al., 2022	CM	0.293984	0.227793	0.478222	ADMIX	E1.1	Besnard et al., 2013
Leccino	82	ITA	Belaj et al., 2022	CM	0.3057	0.619	0.0753007	ADMIX	E1.1	Besnard et al., 2013	G1	Mariotti et al., 2020
Leccio Maremmano	1210	ITA	Belaj et al., 2022	CM	0.428961	0.570939	9.9991e-05	ADMIX	E1.1	Besnard et al., 2013
Leccione	1211	ITA	Belaj et al., 2022	CM	0.313304	0.575741	0.110955	ADMIX	E1.1	Besnard et al., 2013	G1	Mariotti et al., 2020
Lechín de Granada	54	ESP	Belaj et al., 2022	WM	0.189028	0.717782	0.0931903	ADMIX	E1.1	Besnard et al., 2013
Lechín de Sevilla	5	ESP	Belaj et al., 2022	WM	0.0311884	0.33841	0.630402	ADMIX	E2.3	Besnard et al., 2013	G1	Mariotti et al., 2020
Lemeño	758	ESP	Belaj et al., 2022	WM	9.9991e-05	0.0287689	0.971131	C
Lentisca	384	ESP	Belaj et al., 2022	WM	0.263057	0.182012	0.554931	ADMIX	E1.1	Besnard et al., 2013
Leucocarpa	2018	ITA	Belaj et al., 2022	CM	0.0955075	0.904393	9.9991e-05	B	E1.1	Mariotti et al., 2023
Levantinka	703	HRV	Belaj et al., 2022	CM	9.9991e-05	0.362385	0.637515	ADMIX	E1.1	Besnard et al., 2013
Lianolia Kerkyras	694	GRC	Belaj et al., 2022	CM	9.9991e-05	0.906993	0.0929067	B	E2.2	Besnard et al., 2013
Liguria	1459	CHL	Belaj et al., 2022	WM	9.9991e-05	0.905737	0.0941631	B
Limli	1537	DZA	Belaj et al., 2022	CM	0.711765	0.0308642	0.257371	ADMIX	E1.1	Besnard et al., 2013
Limoncillo	35	ESP	Belaj et al., 2022	WM	0.0787836	9.9991e-05	0.921116	C	E1.1	Besnard et al., 2013
Llei de Cadaqués	#N/A	ESP	Gómez Gálvez et al., 2024	WM	0.618188	0.122901	0.258911	ADMIX
Llei de Valero	2555	ESP	Gómez Gálvez et al., 2024	WM	0.708991	0.0887354	0.202274	ADMIX			G1	Castric et al., 2024
Llei del Bessó	2554	ESP	Gómez Gálvez et al., 2024	WM	9.9991e-05	0.894745	0.105155	B
Llimonenca	2176	ESP	Belaj et al., 2022	WM	0.612997	0.050504	0.336499	ADMIX
Lloma	1369	ESP	Belaj et al., 2022	WM	0.49259	9.9991e-05	0.50731	ADMIX
Llorón de Atarfe	534	ESP	Belaj et al., 2022	WM	0.00484749	9.9991e-05	0.995053	C	E1.1	Besnard et al., 2013
Llumeta	226	ESP	Belaj et al., 2022	WM	0.414934	0.584966	9.9991e-05	ADMIX	E3.1	Besnard et al., 2013	G2; Androesterility	Castric et al., 2024; Rojas-Gómez et al., 2023
Lo Parot	2613	ESP	Gómez Gálvez et al., 2024	WM	0.301538	0.39839	0.300073	ADMIX			G2	Castric et al., 2024
Loaime	414	ESP	Belaj et al., 2022	WM	9.9991e-05	0.0037794	0.996121	C	E1.1	Besnard et al., 2013
Longue de Meliana	1534	DZA	Belaj et al., 2022	CM	0.441648	9.9991e-05	0.558252	ADMIX	E1.1	Besnard et al., 2013
Lucio	753	ESP	Belaj et al., 2022	WM	9.9991e-05	0.0649136	0.934986	C
Lucques	322	FRA	Belaj et al., 2022	WM	0.482859	0.111922	0.405219	ADMIX	E1.1	Besnard et al., 2013	G2	Castric et al., 2024
Lumbardina	1997	MNE	Belaj et al., 2022	CM	0.408957	0.391251	0.199792	ADMIX
Lumiaro	1337	ITA	Belaj et al., 2022	CM	0.493901	9.9991e-05	0.505999	ADMIX	E1.1	Besnard et al., 2013
Maarri	1125	SYR	Belaj et al., 2022	EM	0.94918	9.9991e-05	0.0507204	A	E1.1	Besnard et al., 2013
Machazo de Ribafrecha	#N/A	ESP	Gómez Gálvez et al., 2024	WM	0.358805	9.9991e-05	0.641095	ADMIX
Macho de Galilea	#N/A	ESP	Gómez Gálvez et al., 2024	WM	0.793919	9.9991e-05	0.205981	A
Macho de Jaén	28	ESP	Belaj et al., 2022	WM	0.0160756	9.9991e-05	0.983824	C
Macho de Vilches	#N/A	ESP	Gómez Gálvez et al., 2024	WM	0.0235132	9.9991e-05	0.976387	C
Machorrón	448	ESP	Belaj et al., 2022	WM	0.091117	9.9991e-05	0.908783	C	E1.1	Besnard et al., 2013	G2	Mariotti et al., 2020
Madonna dell'Impruneta	1212	ITA	Belaj et al., 2022	CM	0.431872	0.420537	0.147591	ADMIX	E1.1	Khadari et al., 2019
Madural de Mallorca	#N/A	ESP	Gómez Gálvez et al., 2024	WM	9.9991e-05	0.0137048	0.986195	C
Mahati-1010	1010	SYR	Belaj et al., 2022	EM	0.903723	0.0734384	0.0228388	A
Mahati-846	846	SYR	Belaj et al., 2022	EM	0.9998	9.999e-05	9.999e-05	A
Majhol-1059	1059	SYR	Belaj et al., 2022	EM	0.838917	9.9991e-05	0.160983	A
Majhol-1122	1122	SYR	Belaj et al., 2022	EM	0.947168	9.9991e-05	0.0527323	A
Majhol-152	152	SYR	Belaj et al., 2022	EM	0.772916	0.15121	0.0758738	A	E1	Julca et al., 2020
Managjel	1711	ALB	Belaj et al., 2022	CM	0.597604	0.402296	9.9991e-05	ADMIX
Manakiri	1600	SYR	Belaj et al., 2022	EM	0.405567	0.245813	0.348619	ADMIX	E1.2	Besnard et al., 2013
Mançanal d'Arnes	#N/A	ESP	Gómez Gálvez et al., 2024	WM	0.41638	9.9991e-05	0.58352	ADMIX			G1	Castric et al., 2024
Mançanenca d'Albages	#N/A	ESP	Gómez Gálvez et al., 2024	WM	0.49419	0.0255177	0.480292	ADMIX
Mançanenca de Batea	#N/A	ESP	Gómez Gálvez et al., 2024	WM	0.40249	0.205467	0.392043	ADMIX			G2; Androesterility	Castric et al., 2024;Field observation
Mangar Erragma	1681	TUN	Belaj et al., 2022	CM	0.463127	0.256725	0.280148	ADMIX
Mansa	2524	ESP	Gómez Gálvez et al., 2024	WM	9.9991e-05	0.0718044	0.928096	C
Manubenca	#N/A	ESP	Gómez Gálvez et al., 2024	WM	0.10479	0.72726	0.16795	ADMIX
Manzanella del Mezquin	#N/A	ESP	Gómez Gálvez et al., 2024	WM	0.875188	0.124712	9.9991e-05	A
Manzanil de Piedra Buena-489	489	ESP	Belaj et al., 2022	WM	0.00662005	9.9991e-05	0.99328	C
Manzanilla Aceitera	1451	ARG	Belaj et al., 2022	WM	9.9991e-05	0.370585	0.629315	ADMIX
Manzanilla Baquetera	#N/A	ESP	Gómez Gálvez et al., 2024	WM	0.00515543	0.127741	0.867104	C
Manzanilla Cacereña	123	PRT	Belaj et al., 2022	WM	9.999e-05	9.999e-05	0.9998	C	E1.1	Besnard et al., 2013	G2	Mariotti et al., 2020
Manzanilla de Abla	770	ESP	Belaj et al., 2022	WM	0.0226946	9.9991e-05	0.977205	C	E1.1	Besnard et al., 2013
Manzanilla de Agua	406	ESP	Belaj et al., 2022	WM	9.9991e-05	0.0296286	0.970271	C	E1.1	Besnard et al., 2013	G2	Mariotti et al., 2020
Manzanilla de Alfarnatejo	#N/A	ESP	Gómez Gálvez et al., 2024	WM	9.999e-05	9.999e-05	0.9998	C
Manzanilla de Almería	784	ESP	Belaj et al., 2022	WM	9.9991e-05	0.0699245	0.929976	C	E1.1	Besnard et al., 2013
Manzanilla de Caudiel	2188	ESP	Belaj et al., 2022	WM	0.238477	0.360796	0.400727	ADMIX
Manzanilla de Hellín	801	ESP	Belaj et al., 2022	WM	0.109028	9.9991e-05	0.890872	C	E1.1	Besnard et al., 2013
Manzanilla de Montefrío	401	ESP	Belaj et al., 2022	WM	9.999e-05	9.999e-05	0.9998	C	E1.1	Besnard et al., 2013
Manzanilla de San Vicente	1134	MEX	Belaj et al., 2022	WM	0.0570345	0.479219	0.463746	ADMIX
Manzanilla de Sevilla	21	ESP	Belaj et al., 2022	WM	9.9991e-05	0.0142218	0.985678	C	E1.1	Besnard et al., 2013	G2	Mariotti et al., 2020; Raimondeau et al., 2024
Manzanilla del Piquito	269	ESP	Belaj et al., 2022	WM	9.999e-05	9.999e-05	0.9998	C
Manzanilla Prieta	360	ESP	Belaj et al., 2022	WM	9.9991e-05	0.0582146	0.941685	C	E1.1	Mariotti et al., 2023
Manzanillera de Huércal Overa	757	ESP	Belaj et al., 2022	WM	0.154748	0.479272	0.36598	ADMIX	E2	Julca et al., 2020
Manzanillo Cordobés de Cabra	1818	ESP	Belaj et al., 2022	WM	0.115637	9.9991e-05	0.884263	C
Maraki	1742	EGY	Belaj et al., 2022	EM	0.871926	0.127974	9.9991e-05	A	E1.2	Besnard et al., 2013
Marantelli	2292	TUR	Belaj et al., 2022	EM	0.665524	9.9991e-05	0.334376	ADMIX
Marfil	1923	ESP	Belaj et al., 2022	WM	0.378461	0.445269	0.176269	ADMIX			G1	Castric et al., 2024
Mari	1143	IRN	Belaj et al., 2022	EM	0.9998	9.999e-05	9.999e-05	A	E1; E1.1	Julca et al., 2020; Mariotti et al., 2023
Marsaline-1509	1509	TUN	Belaj et al., 2022	CM	0.496514	9.9991e-05	0.503386	ADMIX
Marsaline-1684	1684	TUN	Belaj et al., 2022	CM	0.110158	0.462046	0.427796	ADMIX
Martina	2600	ESP	Validation control (seedling from known genitors)	WM	0.578252	0.223337	0.198411	ADMIX
Masabi	1121	SYR	Belaj et al., 2022	EM	0.988162	0.00844797	0.00338964	A	E1.2	Besnard et al., 2013
Masepo	1970	ISR	Belaj et al., 2022	EM	0.489712	0.0606957	0.449592	ADMIX
Masri	2069	LBN	Belaj et al., 2022	EM	0.860401	0.139499	9.9991e-05	A
Mastoidis	345	GRC	Belaj et al., 2022	CM	0.543437	0.456463	9.9991e-05	ADMIX	E1.1	Besnard et al., 2013	G2	Mariotti et al., 2020
Matias	2177	ESP	Belaj et al., 2022	WM	0.0735333	9.9991e-05	0.926367	C
Matolia	2209	GRC	Belaj et al., 2022	CM	0.0576356	0.541623	0.400741	ADMIX
Mauri	#N/A	ESP	Gómez Gálvez et al., 2024	WM	0.507571	9.9991e-05	0.492329	ADMIX			G2	Castric et al., 2024
Maurino	84	ITA	Belaj et al., 2022	CM	0.193225	0.571115	0.235661	ADMIX	E1.1	Besnard et al., 2013	G2	Mariotti et al., 2020
Mavreya	699	GRC	Belaj et al., 2022	CM	0.237425	0.762475	9.9991e-05	B	E1; E1.3	Julca et al., 2020; Mariotti et al., 2023
Mawi	990	SYR	Belaj et al., 2022	EM	0.824242	0.0770336	0.0987243	A	E1.2; E1	Khadari et al., 2019; Julca et al., 2020
Megaron	2236	GRC	Belaj et al., 2022	CM	0.647488	9.9991e-05	0.352412	ADMIX	E2.2	Julca et al., 2020
Melkabazi	2349	TUR	Belaj et al., 2022	EM	0.807757	0.139069	0.0531743	A
Meloky	1747	EGY	Belaj et al., 2022	EM	0.902558	0.0973423	9.9991e-05	A	E1.2	Besnard et al., 2013
Memecik	93	TUR	Belaj et al., 2022	EM	0.805433	9.9991e-05	0.194467	A	E1.1	Besnard et al., 2013
Memeli	2359	TUR	Belaj et al., 2022	EM	0.98724	0.0126596	9.9991e-05	A
Menudel	2224	FRA	Belaj et al., 2022	WM	0.209505	0.104117	0.686379	ADMIX	E1.1	Khadari et al., 2019
Menya	669	ESP	Belaj et al., 2022	WM	0.244466	0.602614	0.15292	ADMIX	E2	Julca et al., 2020	G1	Castric et al., 2024
Merhavia	120	ISR	Belaj et al., 2022	EM	0.533622	9.9991e-05	0.466278	ADMIX	E1.1	Besnard et al., 2013	G2	Castric et al., 2024
Meski	115	TUN	Belaj et al., 2022	CM	0.84662	9.9991e-05	0.15328	A	E1.1	Besnard et al., 2013
Meskyet Dawla Gafsa	1832	TUN	Belaj et al., 2022	CM	0.770926	0.228974	9.9991e-05	A
Mesyaf_2	1628	SYR	Belaj et al., 2022	EM	0.755765	9.9991e-05	0.244135	A	E1.1	Besnard et al., 2013	G1	Mariotti et al., 2020
Mfartah Blettech	1887	TUN	Belaj et al., 2022	CM	9.999e-05	0.9998	9.999e-05	B
Mignolo	1215	ITA	Belaj et al., 2022	CM	0.0404795	0.53681	0.422711	ADMIX	E1.1	Besnard et al., 2013	G2	Mariotti et al., 2020
Mignolo Cerretano	1216	ITA	Belaj et al., 2022	CM	0.0540454	0.775001	0.170954	B	E1.1	Besnard et al., 2013
Miquel Vilaseca	#N/A	ESP	Gómez Gálvez et al., 2024	WM	0.519808	0.480092	9.9991e-05	ADMIX
Mixani	1079	ALB	Belaj et al., 2022	CM	0.929406	0.0704942	9.9991e-05	A
Mlouki Blettech	1872	TUN	Belaj et al., 2022	CM	0.394711	0.4136	0.191688	ADMIX
Mochuto	2040	ESP	Belaj et al., 2022	WM	0.322145	9.9991e-05	0.677755	ADMIX
Moixonenca de Rafels	#N/A	ESP	Gómez Gálvez et al., 2024	WM	0.916759	0.083141	9.9991e-05	A
Mollar Basto	864	ESP	Belaj et al., 2022	WM	0.060707	9.9991e-05	0.939193	C
Mollar de Cieza	440	ESP	Belaj et al., 2022	WM	0.0711804	9.9991e-05	0.92872	C	E1.1	Besnard et al., 2013	G2	Mariotti et al., 2020
Moncita	2231	FRA	Belaj et al., 2022	WM	0.482445	0.346697	0.170858	ADMIX			G1	Castric et al., 2024
Montrroy	#N/A	ESP	Gómez Gálvez et al., 2024	WM	0.164411	0.422531	0.413058	ADMIX
Moraiolo	85	ITA	Belaj et al., 2022	CM	0.39852	0.535794	0.0656857	ADMIX	E1.1	Besnard et al., 2013	G1	Mariotti et al., 2020
Morcaire	#N/A	ESP	Gómez Gálvez et al., 2024	WM	0.338323	0.064125	0.597552	ADMIX
Morchiaio	1220	ITA	Belaj et al., 2022	CM	0.384608	0.448984	0.166408	ADMIX	E1.1	Besnard et al., 2013	G2	Mariotti et al., 2020
Morchione	1219	ITA	Belaj et al., 2022	CM	0.272856	0.353525	0.37362	ADMIX	E1.1	Besnard et al., 2013
Morcone	1221	ITA	Belaj et al., 2022	CM	0.0793808	0.805581	0.115038	B	E1.3	Besnard et al., 2013	G2	Mariotti et al., 2020
Moresca	1340	ITA	Belaj et al., 2022	CM	0.484904	0.0478246	0.467271	ADMIX	E1.1	Mariotti et al., 2023	G1	Mariotti et al., 2020
Morisca	17	ESP	Belaj et al., 2022	WM	9.9991e-05	0.0178698	0.98203	C	E1.1	Besnard et al., 2013
Morisca de Mancor	740	ESP	Belaj et al., 2022	WM	0.475777	9.9991e-05	0.524123	ADMIX
Morisca Picuilla	2451	ESP	Gómez Gálvez et al., 2024	WM	0.619265	0.112623	0.268112	ADMIX
Morona	270	ESP	Belaj et al., 2022	WM	9.999e-05	9.999e-05	0.9998	C	E1.1	Besnard et al., 2013
Morona de Castellón	2198	ESP	Belaj et al., 2022	WM	0.174993	0.517753	0.307254	ADMIX
Morruda de Segorbe	2192	ESP	Belaj et al., 2022	WM	0.0637862	0.513711	0.422503	ADMIX			G1	Castric et al., 2024
Morrut	224	ESP	Belaj et al., 2022	WM	0.563763	0.370531	0.0657057	ADMIX	E1.1	Besnard et al., 2013	G2	Mariotti et al., 2020
Morrut de la Faldeta	#N/A	ESP	Gómez Gálvez et al., 2024	WM	0.0689195	0.467958	0.463123	ADMIX			G2	Castric et al., 2024
Morrut-607	607	ESP	Belaj et al., 2022	WM	0.109641	9.9991e-05	0.890259	C
Mrčakinja	1991	HRV	Belaj et al., 2022	CM	9.9991e-05	0.724023	0.275877	ADMIX
Muixonenca de Torre d' Arques	#N/A	ESP	Gómez Gálvez et al., 2024	WM	0.864079	0.135821	9.9991e-05	A
Nación	2035	ESP	Belaj et al., 2022	WM	0.613429	9.9991e-05	0.386471	ADMIX
Nasitana	1341	ITA	Belaj et al., 2022	CM	0.424029	0.125479	0.450492	ADMIX	E1.1	Besnard et al., 2013
Neb Djemel	1524	DZA	Belaj et al., 2022	CM	0.239933	0.759967	9.9991e-05	B	E2.1	Khadari et al., 2019
Neb Tataouine	1902	TUN	Belaj et al., 2022	CM	9.9991e-05	0.746727	0.253173	ADMIX
Negral de Bierge	2029	ESP	Belaj et al., 2022	WM	0.996821	0.00307911	9.9991e-05	A
Negral de Préjano	#N/A	ESP	Gómez Gálvez et al., 2024	WM	0.690407	9.9991e-05	0.309493	ADMIX
Negret	#N/A	ESP	Gómez Gálvez et al., 2024	WM	9.9991e-05	0.891017	0.108883	B			G1	Castric et al., 2024
Négrette	2216	FRA	Belaj et al., 2022	WM	0.0667547	0.180793	0.752453	C	E1.1	Khadari et al., 2019
Negrilla de Cortijo Fraile	#N/A	ESP	Gómez Gálvez et al., 2024	WM	0.0177319	0.496317	0.485951	ADMIX
Negrillo de Arjona	27	ESP	Belaj et al., 2022	WM	0.0212214	0.0715229	0.907256	C	E1.1	Besnard et al., 2013	G2	Mariotti et al., 2020
Negrillo de Ausejo	2506	ESP	Gómez Gálvez et al., 2024	WM	0.712041	9.9991e-05	0.287859	ADMIX
Negrillo de Iznalloz	411	ESP	Belaj et al., 2022	WM	0.0691247	9.9991e-05	0.930775	C	E1.1	Khadari et al., 2019
Negrillo de la Carlota	355	ESP	Belaj et al., 2022	WM	9.999e-05	9.999e-05	0.9998	C	E1.1	Besnard et al., 2013
Negrillo Redondo	410	ESP	Belaj et al., 2022	WM	0.123477	9.9991e-05	0.876423	C	E1.1	Besnard et al., 2013
Negro del Carpio	750	ESP	Belaj et al., 2022	WM	0.000424829	0.00694692	0.992628	C
Neral	2253	ESP	Belaj et al., 2022	WM	0.598471	9.9991e-05	0.401429	ADMIX
Nerba	1342	ITA	Belaj et al., 2022	CM	0.476308	0.0145826	0.50911	ADMIX	E1.1	Besnard et al., 2013
Nevadillo Blanco de Jaén	44	ESP	Belaj et al., 2022	WM	9.9991e-05	0.0647663	0.935134	C
Nevadillo de la Axarquía	2398	ESP	Gómez Gálvez et al., 2024	WM	0.60475	0.272034	0.123215	ADMIX
Nevadillo de Santisteban Pto	335	ESP	Belaj et al., 2022	WM	0.00641342	9.9991e-05	0.993487	C
Nevadillo Negro	#N/A	ESP	Gómez Gálvez et al., 2024	WM	9.999e-05	9.999e-05	0.9998	C
Nevadillo Negro-2282	2282	ESP	Belaj et al., 2022	WM	0.468152	0.0857212	0.446127	ADMIX
Nevado Azul	306	ESP	Belaj et al., 2022	WM	0.0155571	9.9991e-05	0.984343	C	E1.1	Besnard et al., 2013
Nevado Basto	305	ESP	Belaj et al., 2022	WM	9.9991e-05	0.0369067	0.962993	C
Nevado Basto de Zuheros	2165	ESP	Belaj et al., 2022	WM	0.108854	9.9991e-05	0.891046	C
Nevado Rizado	773	ESP	Belaj et al., 2022	WM	9.999e-05	9.999e-05	0.9998	C	E1.1	Besnard et al., 2013
Nocellara del Belice	1267	ITA	Belaj et al., 2022	CM	0.628682	9.9991e-05	0.371218	ADMIX	E1.1	Besnard et al., 2013	G2	Mariotti et al., 2020
Nocellara Messinese	1268	ITA	Belaj et al., 2022	CM	0.657292	9.9991e-05	0.342608	ADMIX	E1.1	Besnard et al., 2013	G1	Mariotti et al., 2020
Nociara	1269	ITA	Belaj et al., 2022	CM	0.156407	0.488497	0.355096	ADMIX	E1.1	Besnard et al., 2013	G1	Mariotti et al., 2020
Oblica	706	HRV	Belaj et al., 2022	CM	0.391907	0.129828	0.478265	ADMIX	E1.1	Besnard et al., 2013
Ocal	282	ESP	Belaj et al., 2022	WM	9.999e-05	9.999e-05	0.9998	C	E1.1	Besnard et al., 2013
Ocal Cordobesa	25	ESP	Belaj et al., 2022	WM	0.270258	9.9991e-05	0.729642	ADMIX	E1.1	Besnard et al., 2013	G2	Mariotti et al., 2020
Ocal de Alburquerque	427	ESP	Belaj et al., 2022	WM	0.00142947	0.0299408	0.96863	C
Ogliarola del Bradano	1270	ITA	Belaj et al., 2022	CM	9.9991e-05	0.854337	0.145563	B	E1.1	Besnard et al., 2013
Ogliarola del Vulture	1271	ITA	Belaj et al., 2022	CM	0.5814	0.4185	9.9991e-05	ADMIX	E1.1	Besnard et al., 2013	G1	Mariotti et al., 2020
Ojo de Liebre	413	ESP	Belaj et al., 2022	WM	9.9991e-05	0.020637	0.979263	C	E1.1	Besnard et al., 2013
Olaya	2184	ESP	Belaj et al., 2022	WM	0.411452	0.301303	0.287245	ADMIX
Oliva	2399	ESP	Gómez Gálvez et al., 2024	WM	0.337517	0.311609	0.350874	ADMIX
Oliva Grande de Santiesteban del puerto	2432	ESP	Gómez Gálvez et al., 2024	WM	0.172571	0.702577	0.124852	ADMIX
Olivastra di Populonia	1222	ITA	Belaj et al., 2022	CM	9.9991e-05	0.847849	0.152051	B	E1.1	Besnard et al., 2013
Olivastra Seggianese	1223	ITA	Belaj et al., 2022	CM	9.9991e-05	0.857491	0.142409	B	E1.1	Besnard et al., 2013
Olivera d'Aransis	#N/A	ESP	Gómez Gálvez et al., 2024	WM	0.923036	0.0768645	9.9991e-05	A
Olivera de l'Amado	#N/A	ESP	Gómez Gálvez et al., 2024	WM	0.290847	0.68745	0.0217037	ADMIX
Olivera de Llimiana	#N/A	ESP	Gómez Gálvez et al., 2024	WM	0.334338	0.146651	0.519011	ADMIX
Olivo Alcaparral	#N/A	ESP	Gómez Gálvez et al., 2024	WM	0.0406248	0.0235756	0.9358	C
Olivo de Aguamarga	1973	ESP	Belaj et al., 2022	WM	0.449095	0.391306	0.159599	ADMIX
Olivo de Alberite	#N/A	ESP	Gómez Gálvez et al., 2024	WM	0.450508	9.9991e-05	0.549392	ADMIX
Olivo de Clavijo_1	#N/A	ESP	Gómez Gálvez et al., 2024	WM	0.421585	9.9991e-05	0.578315	ADMIX
Olivo de Clavijo_2	#N/A	ESP	Gómez Gálvez et al., 2024	WM	0.678347	9.9991e-05	0.321553	ADMIX
Olivo de Clavijo_3	#N/A	ESP	Gómez Gálvez et al., 2024	WM	0.52754	9.9991e-05	0.47236	ADMIX
Olivo de Clavijo_4	#N/A	ESP	Gómez Gálvez et al., 2024	WM	0.491556	9.9991e-05	0.508344	ADMIX
Olivo de Fuentebuena	2431	ESP	Gómez Gálvez et al., 2024	WM	0.398978	0.185443	0.415579	ADMIX
Olivo de Galicia	2160	ESP	Belaj et al., 2022	WM	0.0245522	0.492898	0.48255	ADMIX
Olivo de Ibiza_1	#N/A	ESP	Gómez Gálvez et al., 2024	WM	0.605826	0.0151192	0.379054	ADMIX
Olivo de Ibiza_2	#N/A	ESP	Gómez Gálvez et al., 2024	WM	0.9998	9.999e-05	9.999e-05	A
Olivo de la Albaida	#N/A	ESP	Gómez Gálvez et al., 2024	WM	0.0275862	0.541665	0.430748	ADMIX
Olivo de la Campana	#N/A	ESP	Gómez Gálvez et al., 2024	WM	0.0467903	0.0739047	0.879305	C
Olivo de la Noria	2415	ESP	Gómez Gálvez et al., 2024	WM	0.0216756	0.00666908	0.971655	C
Olivo de Lagunilla de Jubera	#N/A	ESP	Gómez Gálvez et al., 2024	WM	0.677553	9.9991e-05	0.322347	ADMIX
Olivo de l'Albera	#N/A	ESP	Gómez Gálvez et al., 2024	WM	0.0820962	0.749857	0.168047	ADMIX
Olivo de Leza	#N/A	ESP	Gómez Gálvez et al., 2024	WM	0.349517	9.9991e-05	0.650383	ADMIX
Olivo de Logroño	#N/A	ESP	Gómez Gálvez et al., 2024	WM	0.654373	9.9991e-05	0.345527	ADMIX
Olivo de Los Prados	2485	ESP	Gómez Gálvez et al., 2024	WM	0.50385	0.3648	0.13135	ADMIX
Olivo de Mallorca_1	#N/A	ESP	Gómez Gálvez et al., 2024	WM	9.999e-05	9.999e-05	0.9998	C
Olivo de Mancha Real	797	ESP	Belaj et al., 2022	WM	0.0345618	9.9991e-05	0.965338	C	E1.1	Besnard et al., 2013
Olivo de Maura	309	ESP	Belaj et al., 2022	WM	0.068752	0.35242	0.578827	ADMIX
Olivo de Murillo de Río Leza	#N/A	ESP	Gómez Gálvez et al., 2024	WM	0.386719	9.9991e-05	0.613181	ADMIX
Olivo de Órgiva	2424	ESP	Gómez Gálvez et al., 2024	WM	0.460196	0.532482	0.00732202	ADMIX
Olivo de Pagodulce	2514	ESP	Gómez Gálvez et al., 2024	WM	9.9991e-05	0.0439179	0.955982	C
Olivo de Ribafrecha-2509	2509	ESP	Gómez Gálvez et al., 2024	WM	0.330098	0.0257381	0.644164	ADMIX
Olivo de Ribafrecha-2512	2512	ESP	Gómez Gálvez et al., 2024	WM	0.324451	9.9991e-05	0.675449	ADMIX
Olivo de Santa Engracia	2504	ESP	Gómez Gálvez et al., 2024	WM	0.580218	9.9991e-05	0.419682	ADMIX
Olivo de Sojuela	#N/A	ESP	Gómez Gálvez et al., 2024	WM	0.416513	9.9991e-05	0.583387	ADMIX
Olivo de Sortes	2427	ESP	Gómez Gálvez et al., 2024	WM	0.209518	0.499135	0.291347	ADMIX
Olivo de Villamediana	#N/A	ESP	Gómez Gálvez et al., 2024	WM	0.49931	9.9991e-05	0.50059	ADMIX
Olivo del Mulino	1224	ITA	Belaj et al., 2022	CM	0.442399	0.108962	0.448639	ADMIX	E1.1	Besnard et al., 2013
Olivo di Casavecchia	1225	ITA	Belaj et al., 2022	CM	0.24088	0.393028	0.366091	ADMIX	E1.1	Besnard et al., 2013
Olivo di Mandanici	1348	ITA	Belaj et al., 2022	CM	0.094721	0.689792	0.215487	ADMIX	E1.1	Khadari et al., 2019
Olivo di San Lorenzo	1226	ITA	Belaj et al., 2022	CM	0.352208	0.448575	0.199217	ADMIX	E1.1	Besnard et al., 2013
Olivo Gordo de Benisalte	#N/A	ESP	Gómez Gálvez et al., 2024	WM	0.00948361	0.752217	0.2383	B
Olivo Gordo de Jinegros	2441	ESP	Gómez Gálvez et al., 2024	WM	0.0164721	0.012497	0.971031	C
Olivo milenario de La Rábida	2443	ESP	Gómez Gálvez et al., 2024	WM	0.0720607	9.9991e-05	0.927839	C
Olivoner	#N/A	ESP	Gómez Gálvez et al., 2024	WM	0.744063	0.059355	0.196582	ADMIX
Olivonero de Ayerbe	2250	ESP	Belaj et al., 2022	WM	0.599422	0.285959	0.114619	ADMIX
Olivos de Cotillas	2144	ESP	Belaj et al., 2022	WM	0.312015	0.214261	0.473724	ADMIX
Olivos de El Barranco del Lobo	2148	ESP	Belaj et al., 2022	WM	0.077194	9.9991e-05	0.922706	C
Ombligón	2518	ESP	Gómez Gálvez et al., 2024	WM	0.0123124	0.00304173	0.984646	C
Ornellaia	1227	ITA	Belaj et al., 2022	CM	0.279148	0.490241	0.230611	ADMIX	E1.1	Besnard et al., 2013
Otos_1	2197	ESP	Belaj et al., 2022	WM	0.363882	0.112	0.524118	ADMIX
Ouslati	114	TUN	Belaj et al., 2022	CM	0.334934	0.664966	9.9991e-05	ADMIX	E2.N4	Mariotti et al., 2023
Pačica	2390	HRV	Belaj et al., 2022	CM	0.258183	0.322593	0.419225	ADMIX
Pajarera	771	ESP	Belaj et al., 2022	WM	0.0945227	9.9991e-05	0.905377	C
Pajarero	26	ESP	Belaj et al., 2022	WM	0.0571271	9.9991e-05	0.942773	C
Palomar	661	ESP	Belaj et al., 2022	WM	0.273516	0.445233	0.281252	ADMIX	E3.1	Besnard et al., 2013	G2; Androesterility	Castric et al., 2024; Rojas-Gómez et al., 2023
Panisello	#N/A	ESP	Gómez Gálvez et al., 2024	WM	0.264278	0.209278	0.526444	ADMIX			G1	Castric et al., 2024
Panseñera	2244	ESP	Belaj et al., 2022	WM	0.930027	0.0698734	9.9991e-05	A
Pardiguier	2220	FRA	Belaj et al., 2022	WM	0.385424	0.381303	0.233273	ADMIX			G2	Castric et al., 2024
Pascual_1	2193	ESP	Belaj et al., 2022	WM	0.357174	0.396123	0.246702	ADMIX
Passulunara	1349	ITA	Belaj et al., 2022	CM	0.604925	9.9991e-05	0.394975	ADMIX	E1.1	Besnard et al., 2013	G2	Mariotti et al., 2020
Patrón de Cabús	1445	ESP	Belaj et al., 2022	WM	0.0851482	0.885705	0.0291463	B			Androesterility	Field observation
Patronet	649	ESP	Belaj et al., 2022	WM	0.455992	0.361968	0.18204	ADMIX	E3.1	Besnard et al., 2013
Pavo	272	ESP	Belaj et al., 2022	WM	9.999e-05	9.999e-05	0.9998	C	E1.1	Besnard et al., 2013
Pendolino	87	ITA	Belaj et al., 2022	CM	0.0413897	0.518449	0.440162	ADMIX	E1.1	Besnard et al., 2013	G2	Mariotti et al., 2020
Penjoll	1442	ESP	Belaj et al., 2022	WM	0.11503	0.411459	0.473511	ADMIX
Pequeña de Casas Ibáñez	562	ESP	Belaj et al., 2022	WM	0.109364	0.487065	0.403571	ADMIX
Perafort	1073	ESP	Belaj et al., 2022	WM	0.481828	0.230024	0.288148	ADMIX			G1	Castric et al., 2024
Piangente	1230	ITA	Belaj et al., 2022	CM	0.124133	0.663737	0.21213	ADMIX	E1.1	Besnard et al., 2013	G2	Mariotti et al., 2020
Picalaceña de Cornago	2027	ESP	Belaj et al., 2022	WM	0.458684	9.9991e-05	0.541216	ADMIX
Picholine du Languedoc	70	FRA	Belaj et al., 2022	WM	0.217698	0.200157	0.582146	ADMIX	E2.1	Besnard et al., 2013	G1	Mariotti et al., 2020; Raimondeau et al., 2024
Picholine Marocaine	101	MAR	Belaj et al., 2022	WM	9.999e-05	9.999e-05	0.9998	C	E1.1	Besnard et al., 2013	G2	Mariotti et al., 2020; Raimondeau et al., 2024
Picholine-1091	1091	FRA	Belaj et al., 2022	WM	0.242102	0.287354	0.470545	ADMIX
Pico Limón	273	ESP	Belaj et al., 2022	WM	9.999e-05	9.999e-05	0.9998	C
Pico Limón de Grazalema	371	ESP	Belaj et al., 2022	WM	9.999e-05	9.999e-05	0.9998	C	E1.1	Besnard et al., 2013
Picoso	2136	ESP	Belaj et al., 2022	WM	0.118454	9.9991e-05	0.881446	C
Picual	9	ESP	Belaj et al., 2022	WM	0.0371273	9.9991e-05	0.962773	C	E1.1	Besnard et al., 2013	G2	Mariotti et al., 2020
Picual de Almería	798	ESP	Belaj et al., 2022	WM	0.0276526	0.0220308	0.950317	C
Picuda de Luis	2185	ESP	Belaj et al., 2022	WM	0.361968	0.288613	0.349419	ADMIX
Picudillo	#N/A	ESP	Gómez Gálvez et al., 2024	WM	0.419831	9.9991e-05	0.580069	ADMIX
Picudo	3	ESP	Belaj et al., 2022	WM	0.00790775	9.9991e-05	0.991992	C	E1.1	Besnard et al., 2013	G2	Mariotti et al., 2020
Picudo Blanco de Estepa	276	ESP	Belaj et al., 2022	WM	9.9991e-05	0.0188213	0.981079	C
Picudo de Bergasa	2156	ESP	Belaj et al., 2022	WM	0.540399	0.0202748	0.439326	ADMIX
Picudo de la Axarquía	2201	ESP	Belaj et al., 2022	WM	0.0142156	9.9991e-05	0.985684	C
Picudo de Labata	2251	ESP	Belaj et al., 2022	WM	0.356632	9.9991e-05	0.643268	ADMIX
Picudo Mohedano	2403	ESP	Gómez Gálvez et al., 2024	WM	0.67158	0.240191	0.0882291	ADMIX
Pidicuddara	1350	ITA	Belaj et al., 2022	CM	0.603894	0.271706	0.1244	ADMIX	E1.1	Besnard et al., 2013
Piga	2247	ESP	Belaj et al., 2022	WM	0.383009	0.11685	0.50014	ADMIX
Pikrolia	1392	GRC	Belaj et al., 2022	CM	0.19503	0.424921	0.380049	ADMIX	E2.2	Khadari et al., 2019
Piñonera	969	ESP	Belaj et al., 2022	WM	0.252243	0.555668	0.192089	ADMIX	E1	Julca et al., 2020
Pito	#N/A	ESP	Gómez Gálvez et al., 2024	WM	0.413391	0.528062	0.0585477	ADMIX			G1	Castric et al., 2024
Pizz'e Carroga	1322	ITA	Belaj et al., 2022	CM	0.494188	9.9991e-05	0.505712	ADMIX	E1.1	Besnard et al., 2013
Polinizador	1130	MEX	Belaj et al., 2022	WM	0.472014	0.182654	0.345333	ADMIX
Portainjerto de Jabalcuz	2488	ESP	Gómez Gálvez et al., 2024	WM	0.0450898	9.9991e-05	0.95481	C
Puntoža	1974	HRV	Belaj et al., 2022	CM	0.581334	0.00445671	0.414209	ADMIX	E.1.1	Khadari et al., 2019
Queixal de Porc	2187	ESP	Belaj et al., 2022	WM	0.521602	0.0393575	0.43904	ADMIX
Racimal	418	ESP	Belaj et al., 2022	WM	9.999e-05	9.999e-05	0.9998	C	E1.1	Besnard et al., 2013	G2	Mariotti et al., 2020
Racimal de Jaén	34	ESP	Belaj et al., 2022	WM	0.202688	9.9991e-05	0.797212	C
Rañinera	2032	ESP	Belaj et al., 2022	WM	0.678787	9.9991e-05	0.321113	ADMIX
Rapasayo	277	ESP	Belaj et al., 2022	WM	9.9991e-05	0.147638	0.852262	C	E1.1	Besnard et al., 2013
Rara de Cabra	2138	ESP	Gómez Gálvez et al., 2024	WM	9.999e-05	9.999e-05	0.9998	C
Real Sevillana	49	ESP	Belaj et al., 2022	WM	9.999e-05	9.999e-05	0.9998	C
Rechino	372	ESP	Belaj et al., 2022	WM	9.999e-05	9.999e-05	0.9998	C	E1.1	Besnard et al., 2013
Redondilla de Grazalema	365	ESP	Belaj et al., 2022	WM	9.9991e-05	0.0303357	0.969564	C
Redondilla de Logroño	16	ESP	Belaj et al., 2022	WM	0.495535	9.9991e-05	0.504365	ADMIX
Reixonenca	966	ESP	Belaj et al., 2022	WM	0.9998	9.999e-05	9.999e-05	A
Resulja	2388	HRV	Belaj et al., 2022	CM	0.0507269	0.453705	0.495568	ADMIX
R'Khami	1864	TUN	Belaj et al., 2022	CM	0.103171	0.459468	0.437362	ADMIX	E1.2	Besnard et al., 2013
Roalejo de Arnedo	2024	ESP	Belaj et al., 2022	WM	0.61465	9.9991e-05	0.38525	ADMIX
Rogeta	#N/A	ESP	Gómez Gálvez et al., 2024	WM	0.706782	9.9991e-05	0.293118	ADMIX
Rogeta de Gorga_1	2173	ESP	Belaj et al., 2022	WM	0.351812	0.356649	0.291539	ADMIX
Roieta	#N/A	ESP	Gómez Gálvez et al., 2024	WM	0.85351	0.14639	9.9991e-05	A			G1	Castric et al., 2024
Rojal	1448	ESP	Belaj et al., 2022	WM	0.337417	0.302325	0.360258	ADMIX			G2	Castric et al., 2024
Rojal de Valencia	2183	ESP	Belaj et al., 2022	WM	0.096228	0.652611	0.251161	ADMIX
Ronde de la Ménara	1944	MAR	Belaj et al., 2022	WM	0.069217	0.0561441	0.874639	C	E1.1	Besnard et al., 2013
Rosai-2254	2254	JOR	Belaj et al., 2022	EM	0.853786	0.124448	0.0217663	A
Rosciola	88	ITA	Belaj et al., 2022	CM	0.202899	0.695152	0.10195	ADMIX	E.1.1	Khadari et al., 2019
Rossellino	1236	ITA	Belaj et al., 2022	CM	0.296757	0.703143	9.9991e-05	ADMIX	E1.1	Besnard et al., 2013
Rosulja	1977	HRV	Belaj et al., 2022	CM	0.384165	0.485618	0.130217	ADMIX
Rotondella di Melfi	1277	ITA	Belaj et al., 2022	CM	9.9991e-05	0.0504843	0.949416	C	E.1.1	Khadari et al., 2019
Rougette de l'Ardèche	2204	FRA	Belaj et al., 2022	WM	0.50151	0.399811	0.0986783	ADMIX	E2.1	Khadari et al., 2019
Rougette de Metidja-2500	2500	DZA	Belaj et al., 2022	CM	0.0559338	0.850843	0.0932234	B
Rougette de Pignan	2215	FRA	Belaj et al., 2022	WM	0.495928	0.464792	0.0392795	ADMIX	E.1.1	Khadari et al., 2019	G1	Castric et al., 2024
Rowghani	1139	IRN	Belaj et al., 2022	EM	0.889328	0.110572	9.9991e-05	A	E1.1	Mariotti et al., 2023	G2	Raimondeau et al., 2024
Royal	1182	ESP	Belaj et al., 2022	WM	0.375108	9.9991e-05	0.624792	ADMIX	E1	Julca et al., 2020
Royal de Calatayud	965	ESP	Belaj et al., 2022	WM	0.41177	0.00385633	0.584374	ADMIX
Royal de Calatayud-47	47	ESP	Belaj et al., 2022	WM	0.851285	0.148615	9.9991e-05	A
Royal de Cazorla	390	ESP	Belaj et al., 2022	WM	0.092033	9.9991e-05	0.907867	C	E1.1	Besnard et al., 2013
Royal de Sabiñán	962	ESP	Belaj et al., 2022	WM	0.846483	0.153417	9.9991e-05	A
Royeta de Abizanda	2252	ESP	Belaj et al., 2022	WM	0.596262	0.0162326	0.387505	ADMIX
Royeta de Asque	2030	ESP	Belaj et al., 2022	WM	0.557154	0.442746	9.9991e-05	ADMIX
Rufina	2182	ESP	Belaj et al., 2022	WM	0.306878	0.451735	0.241387	ADMIX
S:27_4	2047	PER	Belaj et al., 2022	WM	0.484572	0.184204	0.331224	ADMIX
Sabatera	665	ESP	Belaj et al., 2022	WM	0.465768	0.476445	0.0577872	ADMIX	E2.1	Besnard et al., 2013	G2	Mariotti et al., 2020
Sacakli otur	2297	TUR	Belaj et al., 2022	EM	0.604289	9.9991e-05	0.395611	ADMIX
Safrawi	142	SYR	Belaj et al., 2022	EM	0.9998	9.999e-05	9.999e-05	A	E1.1	Besnard et al., 2013	G1	Castric et al., 2024
Safrawi-1116	1116	SYR	Belaj et al., 2022	EM	0.891133	0.108767	9.9991e-05	A	E1.1	Mariotti et al., 2023
Saifi	1562	SYR	Belaj et al., 2022	EM	0.717684	0.020418	0.261898	ADMIX
Salgar Redondo	348	ESP	Belaj et al., 2022	WM	9.999e-05	9.999e-05	0.9998	C
Salicino	1241	ITA	Belaj et al., 2022	CM	0.454959	0.312592	0.232449	ADMIX	E1.1	Besnard et al., 2013
Salonenque	73	FRA	Belaj et al., 2022	WM	0.919208	0.0691884	0.0116039	A	E1.1	Besnard et al., 2013
Sam (Iznik)	2315	TUR	Belaj et al., 2022	EM	0.623499	0.078803	0.297698	ADMIX
Samanli	2316	TUR	Belaj et al., 2022	EM	0.651304	9.9991e-05	0.348596	ADMIX
Samsun Salamuralik	2306	TUR	Belaj et al., 2022	EM	0.8384	9.9991e-05	0.1615	A
Samsun Tuzlamalik	2351	TUR	Belaj et al., 2022	EM	0.589138	9.9991e-05	0.410762	ADMIX
Samsun Yaglik	2290	TUR	Belaj et al., 2022	EM	0.742896	0.195967	0.0611369	ADMIX
San Francesco	1239	ITA	Belaj et al., 2022	CM	0.254546	0.245882	0.499572	ADMIX	E1.1	Besnard et al., 2013
Sandalio	956	ESP	Belaj et al., 2022	WM	0.248027	0.329785	0.422188	ADMIX
Santa Martinenga	1280	ITA	Belaj et al., 2022	CM	0.325988	0.246121	0.427891	ADMIX	E1.1	Besnard et al., 2013	G2	Mariotti et al., 2020
Sari Ulak	2319	TUR	Belaj et al., 2022	EM	0.879954	0.119946	9.9991e-05	A
Sarrut	#N/A	ESP	Gómez Gálvez et al., 2024	WM	0.825445	9.9991e-05	0.174455	A			G1	Castric et al., 2024
Sati	2300	TUR	Belaj et al., 2022	EM	0.567008	9.9991e-05	0.432892	ADMIX
Sauzen Vert-2218	2218	FRA	Belaj et al., 2022	WM	0.936314	9.9991e-05	0.0635855	A			G1	Castric et al., 2024
Sayali	1670	TUN	Belaj et al., 2022	CM	0.342454	0.320486	0.33706	ADMIX	E1.1	Besnard et al., 2013
Sayali T	1728	TUN	Belaj et al., 2022	CM	0.148765	0.364488	0.486747	ADMIX
Sayfi	1056	SYR	Belaj et al., 2022	EM	0.902451	0.0496536	0.0478955	A
Sebhawy	1749	EGY	Belaj et al., 2022	EM	9.999e-05	9.999e-05	0.9998	C	E1.1	Besnard et al., 2013
Selection-1	#N/A	ESP	Validation control (seedling from known genitors)	WM	0.259985	0.487577	0.252438	ADMIX
Selection-2	#N/A	ESP	Validation control (seedling from known genitors)	WM	0.347542	0.357134	0.295324	ADMIX
Selection-3	#N/A	ESP	Validation control (seedling from known genitors)	WM	0.337879	0.570452	0.0916692	ADMIX
Selection-4	#N/A	ESP	Validation control (seedling from known genitors)	WM	0.466904	0.358432	0.174664	ADMIX
Selection-5	#N/A	ESP	Validation control (seedling from known genitors)	WM	0.475868	0.381685	0.142446	ADMIX
Selection-6	#N/A	ESP	Validation control (seedling from known genitors)	WM	0.399175	0.289219	0.311605	ADMIX
Selection-7	#N/A	ESP	Validation control (seedling from known genitors)	WM	0.316422	0.356029	0.32755	ADMIX
Selection-8	#N/A	ESP	Validation control (seedling from known genitors)	WM	0.501903	0.35607	0.142027	ADMIX
Selvatico	893	ITA	Belaj et al., 2022	CM	0.103045	0.777369	0.119586	B
Semidana	1323	ITA	Belaj et al., 2022	CM	0.478943	0.0261555	0.494902	ADMIX	E1.1	Besnard et al., 2013	G2	Mariotti et al., 2020
Semni Djebeniana	1876	TUN	Belaj et al., 2022	CM	9.999e-05	0.9998	9.999e-05	B
Sennara	2169	EGY	Belaj et al., 2022	EM	0.455623	0.295582	0.248795	ADMIX
Sepoka	1971	ISR	Belaj et al., 2022	EM	0.595022	0.0942291	0.310749	ADMIX
Sepriana	2179	ESP	Belaj et al., 2022	WM	0.502609	0.49098	0.00641087	ADMIX
Sevillana de Abla	768	ESP	Belaj et al., 2022	WM	9.9991e-05	0.0865471	0.913353	C
Sevillano de Jumilla	593	ESP	Belaj et al., 2022	WM	9.9991e-05	0.0254362	0.974464	C	E1.1	Besnard et al., 2013
Sevillenca	227	ESP	Belaj et al., 2022	WM	0.301262	0.148917	0.549821	ADMIX	E1.1	Besnard et al., 2013	G1	Mariotti et al., 2020
Shame	1786	SYR	Belaj et al., 2022	EM	0.820881	0.0811574	0.0979612	A	E1.1	Besnard et al., 2013
Shami	1041	SYR	Belaj et al., 2022	EM	0.735029	0.197975	0.0669964	ADMIX
Shami Modabl	1568	SYR	Belaj et al., 2022	EM	0.828471	0.171429	9.9991e-05	A
Shengeh Manjil	1142	IRN	Belaj et al., 2022	EM	0.874709	0.101808	0.0234827	A
Shengeh Sur	1856	IRN	Belaj et al., 2022	EM	0.911607	0.088293	9.9991e-05	A
Sikitita_2	2599	ESP	Validation control (seedling from known genitors)	WM	0.327095	0.395005	0.2779	ADMIX
Simjaca	1979	HRV	Belaj et al., 2022	CM	0.366289	9.9991e-05	0.633611	ADMIX	E1.1	Besnard et al., 2013
Sinawy	1750	EGY	Belaj et al., 2022	EM	0.188105	0.248951	0.562944	ADMIX
Sinop no 1	685	TUR	Belaj et al., 2022	EM	0.848134	0.151766	9.9991e-05	A
Sinop no 5	2298	TUR	Belaj et al., 2022	EM	0.467429	9.9991e-05	0.532471	ADMIX
Sinop no 6	2304	TUR	Belaj et al., 2022	EM	0.431243	9.9991e-05	0.568657	ADMIX
Siurona	#N/A	ESP	Gómez Gálvez et al., 2024	WM	0.648879	0.351021	9.9991e-05	ADMIX			G1	Castric et al., 2024
Sivigliana da Olio	1304	ITA	Belaj et al., 2022	CM	9.9991e-05	0.472564	0.527336	ADMIX	E2.1	Besnard et al., 2013	G1	Mariotti et al., 2020
Siwi	2167	EGY	Belaj et al., 2022	EM	0.771918	0.227982	9.9991e-05	A
Smertolia	2237	GRC	Belaj et al., 2022	CM	0.24922	0.75068	9.9991e-05	B
Sollana	871	ESP	Belaj et al., 2022	WM	0.692702	0.307198	9.9991e-05	ADMIX
Sorani	787	SYR	Belaj et al., 2022	EM	0.739571	9.9991e-05	0.260329	ADMIX	E1.1	Julca et al., 2020
Souabaa Aljia	1918	TUN	Belaj et al., 2022	CM	9.9991e-05	0.539441	0.460459	ADMIX
Souidi	1513	DZA	Belaj et al., 2022	CM	0.0115575	0.988343	9.9991e-05	B
Souri	1165	ISR	Belaj et al., 2022	EM	0.21796	0.244199	0.53784	ADMIX
Stara Maslina-1999	1999	MNE	Belaj et al., 2022	CM	0.626077	0.373823	9.9991e-05	ADMIX
Stara Maslina-2005	2005	HRV	Belaj et al., 2022	CM	0.049853	0.439508	0.510639	ADMIX
Štorta	2273	SVN	Belaj et al., 2022	CM	0.416312	0.192887	0.390801	ADMIX	E1.1	Besnard et al., 2013
Tachuno	2394	ESP	Belaj et al., 2022	WM	9.9991e-05	0.0278296	0.97207	C
Takesrit	1947	DZA	Belaj et al., 2022	CM	9.9991e-05	0.816309	0.183591	B	E1.1	Besnard et al., 2013
Tarabelsi	2058	SYR	Belaj et al., 2022	EM	0.996249	0.00365089	9.9991e-05	A
Tebabs	1794	SYR	Belaj et al., 2022	EM	0.9998	9.999e-05	9.999e-05	A	E1.3; E1.2	Besnard et al., 2013; Khadari et al., 2019
Tefah	1539	DZA	Belaj et al., 2022	CM	0.452914	9.9991e-05	0.546986	ADMIX	E1.1	Besnard et al., 2013
Temprana de Montán	2175	ESP	Belaj et al., 2022	WM	0.399844	0.26989	0.330266	ADMIX
Tempranillo de Lucena	756	ESP	Belaj et al., 2022	WM	9.999e-05	9.999e-05	0.9998	C	E1.1	Besnard et al., 2013
Tempranillo de Yeste	561	ESP	Belaj et al., 2022	WM	0.0688541	0.0532214	0.877925	C	E1.1	Besnard et al., 2013
Temprano	358	ESP	Belaj et al., 2022	WM	0.0247174	0.114128	0.861155	C	E2	Julca et al., 2020
Teta de la Vaca	2100	ESP	Belaj et al., 2022	WM	0.359051	0.323658	0.317292	ADMIX
Thassitiki	2239	GRC	Belaj et al., 2022	CM	0.679656	0.110736	0.209608	ADMIX
Thiaki	1394	GRC	Belaj et al., 2022	CM	0.0748577	0.541644	0.383498	ADMIX
Tío Blas	2194	ESP	Belaj et al., 2022	WM	0.632066	0.217134	0.1508	ADMIX
Tiuranenca	#N/A	ESP	Gómez Gálvez et al., 2024	WM	0.281274	0.278543	0.440184	ADMIX			G1	Castric et al., 2024
Toffahi	721	EGY	Belaj et al., 2022	EM	0.71625	0.198954	0.0847953	ADMIX	E1.2	Besnard et al., 2013
Toffahi-SYR	1000	SYR	Belaj et al., 2022	EM	0.86805	0.0127607	0.119189	A	E1.1	Besnard et al., 2013
Toffehi Tataouine	1683	TUN	Belaj et al., 2022	CM	0.774554	0.225346	9.9991e-05	A
Tonda Iblea	1352	ITA	Belaj et al., 2022	CM	0.555084	9.9991e-05	0.444816	ADMIX	E1.1	Mariotti et al., 2023
Torcío	2162	ESP	Belaj et al., 2022	WM	9.9991e-05	0.00985252	0.990047	C
Toruno	774	ESP	Belaj et al., 2022	WM	9.999e-05	9.999e-05	0.9998	C
Tounsi Gafsa	1674	TUN	Belaj et al., 2022	CM	0.708591	0.183386	0.108023	ADMIX	E1.1	Besnard et al., 2013
Tragolia	2212	GRC	Belaj et al., 2022	CM	0.556407	0.338611	0.104982	ADMIX
Trylia	992	SYR	Belaj et al., 2022	EM	0.749779	0.250121	9.9991e-05	ADMIX	E1.1	Mariotti et al., 2023
Tufahi Tadmori	1617	SYR	Belaj et al., 2022	EM	0.960637	0.0392633	9.9991e-05	A
Ubac	2232	FRA	Belaj et al., 2022	WM	0.345908	0.105288	0.548805	ADMIX			G2	Castric et al., 2024
Ullastre Toni	#N/A	ESP	Gómez Gálvez et al., 2024	WM	0.112648	0.597232	0.29012	ADMIX
Ulliri i Bardhe i Tiranes	1082	ALB	Belaj et al., 2022	CM	0.84512	0.15478	9.9991e-05	A	E1.1	Besnard et al., 2013
Ulliri i Bardhe i Tiranes-2499	2499	ALB	Belaj et al., 2022	CM	0.0530152	0.880396	0.0665884	B
Ulliri i Kuq	1078	ALB	Belaj et al., 2022	CM	0.541845	0.439233	0.0189212	ADMIX	E1.1	Besnard et al., 2013
Ulliri Shekullor Berat	2268	ALB	Belaj et al., 2022	CM	0.301846	0.551638	0.146516	ADMIX
Unafka	1714	ALB	Belaj et al., 2022	CM	0.246675	0.194937	0.558388	ADMIX
Unknown OT2	1930	MAR	Belaj et al., 2022	WM	0.274739	0.725161	9.9991e-05	ADMIX	E1.1	Besnard et al., 2013
Unknown OZ1	1931	MAR	Belaj et al., 2022	WM	0.0330749	0.71375	0.253175	ADMIX
Uovo di Piccione	75	ITA	Belaj et al., 2022	CM	0.57191	9.9991e-05	0.42799	ADMIX	E1.1	Besnard et al., 2013
Urgavona	2598	ESP	Validation control (seedling from known genitors)	WM	0.308065	0.436292	0.255643	ADMIX
Uslu	95	TUR	Belaj et al., 2022	EM	0.520422	0.10789	0.371688	ADMIX	E1.1	Besnard et al., 2013
Vacía	2438	ESP	Gómez Gálvez et al., 2024	WM	0.117058	0.00963008	0.873312	C
Vaddarica	1353	ITA	Belaj et al., 2022	CM	0.102038	0.452691	0.44527	ADMIX	E1.1	Besnard et al., 2013
Valanolia	103	GRC	Belaj et al., 2022	CM	0.806776	0.02838	0.164844	A	E1.1	Besnard et al., 2013
Valentins	2020	ESP	Belaj et al., 2022	WM	0.499249	0.125387	0.375364	ADMIX			G2	Castric et al., 2024
Vallesa	613	ESP	Belaj et al., 2022	WM	0.253325	0.472437	0.274238	ADMIX			G2; Androesterility	Castric et al., 2024; Rojas-Gómez et al., 2023
Vaneta	664	ESP	Belaj et al., 2022	WM	0.317279	0.462568	0.220152	ADMIX
Varudo	749	ESP	Belaj et al., 2022	WM	0.192242	9.9991e-05	0.807658	C	E1.1	Besnard et al., 2013
Velika Lastovka	1978	HRV	Belaj et al., 2022	CM	0.487163	9.9991e-05	0.512737	ADMIX	E1.1	Besnard et al., 2013
Vera	660	ESP	Belaj et al., 2022	WM	0.471324	0.515557	0.0131185	ADMIX	E3.1	Besnard et al., 2013	G2; Androesterility	Castric et al., 2024; Rojas-Gómez et al., 2023
Verdal d'Algars	#N/A	ESP	Gómez Gálvez et al., 2024	WM	0.18069	0.463711	0.355599	ADMIX
Verdal d'Arnes	#N/A	ESP	Gómez Gálvez et al., 2024	WM	0.615441	0.384459	9.9991e-05	ADMIX			G2	Castric et al., 2024
Verdal de Barcedana	#N/A	ESP	Gómez Gálvez et al., 2024	WM	0.729064	9.9991e-05	0.270836	ADMIX			G1	Castric et al., 2024
Verdal de Bovera	#N/A	ESP	Gómez Gálvez et al., 2024	WM	0.539003	0.433802	0.0271948	ADMIX
Verdal de Figols	#N/A	ESP	Gómez Gálvez et al., 2024	WM	0.877378	0.122522	9.9991e-05	A
Verdal de La Fatarella	#N/A	ESP	Gómez Gálvez et al., 2024	WM	0.652003	0.297773	0.050224	ADMIX
Verdal de Leza	#N/A	ESP	Gómez Gálvez et al., 2024	WM	0.468526	9.9991e-05	0.531374	ADMIX
Verdal de Manresa	663	ESP	Belaj et al., 2022	WM	0.585752	0.0354001	0.378848	ADMIX			Androesterility	Rojas-Gómez et al., 2023
Verdal de Ribafrecha	#N/A	ESP	Gómez Gálvez et al., 2024	WM	0.32361	9.9991e-05	0.67629	ADMIX
Verdal del Pallars	#N/A	ESP	Gómez Gálvez et al., 2024	WM	0.613022	9.9991e-05	0.386878	ADMIX
Verdala	394	ESP	Belaj et al., 2022	WM	9.999e-05	9.999e-05	0.9998	C	E1.1	Besnard et al., 2013
Verdale de l'Hérault	76	FRA	Belaj et al., 2022	WM	0.230042	9.9991e-05	0.769858	C	E1.1	Besnard et al., 2013	G2	Mariotti et al., 2020
Verde Verdelho	887	PRT	Belaj et al., 2022	WM	0.190418	0.318968	0.490614	ADMIX
Verdial de Alcalá la Real	#N/A	ESP	Gómez Gálvez et al., 2024	WM	9.999e-05	9.999e-05	0.9998	C
Verdial de Alcaudete	#N/A	ESP	Gómez Gálvez et al., 2024	WM	0.263624	9.9991e-05	0.736276	ADMIX
Verdial de Badajoz	877	ESP	Belaj et al., 2022	WM	9.9991e-05	0.0245247	0.975375	C	E1.1	Besnard et al., 2013	G2	Mariotti et al., 2020
Verdial de Cádiz	370	ESP	Belaj et al., 2022	WM	0.189904	9.9991e-05	0.809996	C
Verdial de Huévar	6	ESP	Belaj et al., 2022	WM	9.9991e-05	0.0297214	0.970179	C	E1.1	Besnard et al., 2013
Verdial de Vélez-Málaga	883	ESP	Belaj et al., 2022	WM	0.276388	0.419609	0.304003	ADMIX	E1.1	Besnard et al., 2013
Verdial de Vélez-Málaga-51	51	ESP	Belaj et al., 2022	WM	0.454767	0.0197575	0.525476	ADMIX	E1	Julca et al., 2020
Verdiell	677	ESP	Belaj et al., 2022	WM	0.220476	0.702444	0.0770804	ADMIX			G2	Castric et al., 2024
Vidrillo	2132	ESP	Belaj et al., 2022	WM	0.040082	9.9991e-05	0.959818	C
Vigor	#N/A	ESP	Gómez Gálvez et al., 2024	WM	0.323229	0.237691	0.43908	ADMIX			G1	Castric et al., 2024
Villalonga	364	ESP	Belaj et al., 2022	WM	0.550961	0.226273	0.222766	ADMIX	E1.3	Besnard et al., 2013
Vinyols	1065	ESP	Belaj et al., 2022	WM	0.216946	0.379459	0.403595	ADMIX			G2	Castric et al., 2024
VS6	1932	MAR	Belaj et al., 2022	WM	9.9991e-05	0.648433	0.351467	ADMIX	E1.1	Besnard et al., 2013
Wardan	725	EGY	Belaj et al., 2022	EM	0.43059	0.310692	0.258718	ADMIX	E1.1	Besnard et al., 2013
Wateken	1741	EGY	Belaj et al., 2022	EM	0.659825	0.129698	0.210477	ADMIX	E2.1	Besnard et al., 2013
Yag Celebi (Tatayn)	2344	TUR	Belaj et al., 2022	EM	0.741415	0.0424036	0.216182	ADMIX
Yaglik Celebi	2336	TUR	Belaj et al., 2022	EM	0.910783	9.9991e-05	0.0891169	A
Yuvarlak Celebi	2341	TUR	Belaj et al., 2022	EM	0.828718	0.0115841	0.159698	A
Žabarka	1982	HRV	Belaj et al., 2022	CM	0.179736	0.328869	0.491395	ADMIX
Zada	1607	SYR	Belaj et al., 2022	EM	0.87	0.1299	9.9991e-05	A
Zael Almuhra	1605	SYR	Belaj et al., 2022	EM	0.800721	0.00823866	0.19104	A	E1.1	Besnard et al., 2013
Zaity	788	SYR	Belaj et al., 2022	EM	0.952956	0.0364355	0.0106081	A	E1.2	Besnard et al., 2013
Zarbout Louzir	1888	TUN	Belaj et al., 2022	CM	0.0303033	0.833944	0.135753	B
Zard	1140	IRN	Belaj et al., 2022	EM	0.903067	0.0968327	9.9991e-05	A	E1.1	Mariotti et al., 2023
Zard-1810	1810	IRN	Belaj et al., 2022	EM	0.760339	0.141247	0.098414	A
Zarrazi Zarzis	1680	TUN	Belaj et al., 2022	CM	0.33684	0.468447	0.194712	ADMIX	E3.2; E3.1	Besnard et al., 2013; Mariotti 2023	Androesterility	Besnard et al., 2000; Rojas-Gómez et al., 2023
Zeboudj Boudoudan	1948	DZA	Belaj et al., 2022	CM	0.415139	0.295774	0.289087	ADMIX	E1.1	Besnard et al., 2013
Zeitoun Boubezzoula	1890	TUN	Belaj et al., 2022	CM	9.999e-05	0.9998	9.999e-05	B
Zeletni	1523	DZA	Belaj et al., 2022	CM	9.9991e-05	0.60086	0.39904	ADMIX	E2.1	Besnard et al., 2013	G1	Mariotti et al., 2020
Zoncuk	2345	TUR	Belaj et al., 2022	EM	0.776951	0.203063	0.0199862	A
Zorzaleño de Granada	2134	ESP	Belaj et al., 2022	WM	9.9991e-05	0.0719395	0.92796	C
Zorzaleño de Setenil	#N/A	ESP	Gómez Gálvez et al., 2024	WM	0.0089951	0.00193102	0.989074	C
Zuzorka	1985	HRV	Belaj et al., 2022	CM	0.455908	0.520044	0.0240481	ADMIX

## Sheet: Table S2
Putative parent-offspring duos	Loci compared	Kinship methodology in SambaR		Parentage analysis from CERVUS software		Duo infered by both approaches
		r0	KING-robust (φ)	Loci mismatching	Pair LOD score
Abade Helo -- Abade Mour	95			1	24.3234
Abade Helo -- Abbadi Shalal	95			2	19.1227
Abade Helo -- Abo Akfa	95			1	23.1616
Abade Helo -- Abo Anaked	95			2	18.2858
Abade Helo -- Abo Shawke	95			2	15.6428
Abade Helo -- Abou Kanani	94			2	12.564
Abade Helo -- Mahati-846	95	0	0.207	0	27.3719	x
Abade Mour -- Abbadi Abou Gabra-842	95			2	17.1749
Abade Mour -- Abbadi Shalal	95	0	0.254	0	28.9742	x
Abade Mour -- Abo Akfa	95			2	17.8578
Abade Mour -- Abo Shawke	95			1	20.8779
Abade Mour -- Abou Kanani	94			2	14.0436
Abade Mour -- Mahati-846	95	0	0.186	0	26.9204	x
Abadi Rassasi -- Shami	94			1	17.3772
Abbadi Abou Gabra-842 -- Abbadi Shalal	96			2	17.5594
Abbadi Abou Gabra-842 -- Abou Choki-1115	96			2	9.97065
Abbadi Abou Gabra-842 -- Kan Celebi	95			2	8.19306
Abbadi Abou Gabra-842 -- Khuokhe	95			1	13.6481
Abbadi Abou Gabra-842 -- Mahati-846	96	0	0.177	0	26.9145	x
Abbadi Abou Gabra-842 -- Masabi	96			2	10.8026
Abbadi Abou Gabra-842 -- Sayfi	96			2	10.3949
Abbadi Abou Gabra-842 -- Toffahi-SYR	96			1	12.1368
Abbadi Shalal -- Abo Akfa	95			2	20.8363
Abbadi Shalal -- Abo Anaked	96			2	22.1352
Abbadi Shalal -- Jlot-841	96			2	18.3436
Abbadi Shalal -- Mahati-846	96	0	0.207	0	31.0811	x
Abo Akfa -- Abo Anaked	95			2	19.1369
Abo Akfa -- Abo Shawke	95	0	0.278	0	22.0108	x
Abo Akfa -- Barri	95			2	7.31663
Abo Akfa -- Mahati-846	95			1	25.783
Abo Akfa -- Majhol-1122	93			2	6.17516
Abo Akfa -- Saifi	95			2	9.80206
Abo Anaked -- Mahati-846	96			1	27.8029
Abo Shawke -- Claramunt	96			2	6.20873
Abo Shawke -- Mahati-846	96			1	20.5612
Abo Shawke -- Olivera d'Aransis	96			2	6.52789
Abo Shawke -- Panseñera	96			2	6.11714
Abo Shawke -- Safrawi	96			2	5.63984
Abou Choki-1115 -- Agouromanakolia	96			1	7.96271
Abou Choki-1115 -- Dopia Verias	96			2	4.80966
Abou Choki-1115 -- Jlot	96			2	5.06779
Abou Choki-1115 -- Khnfse	96			2	5.96761
Abou Choki-1115 -- Majhol-1122	94			1	8.44859
Abou Choki-1115 -- Negral de Bierge	96			1	9.72869
Abou Choki-1115 -- Sacakli otur	95			1	5.91693
Abou Choki-1115 -- Safrawi	96	0	0.239	0	11.908	x
Abou Choki-1115 -- Sam (Iznik)	94			1	10.1489
Abou Choki-1115 -- Sinop no 6	96			1	6.10112
Abou Choki-1115 -- Toffahi-SYR	96			1	14.3472
Abou Kanani -- Bathni	95			2	7.65568
Abou Kanani -- Jlot	95	0	0.275	0	20.7397	x
Abou Kanani -- Khuokhe	95			1	9.23111
Abou Kanani -- Mahati-846	95			1	21.4748
Abou Kanani -- Majhol-1122	94			2	6.38948
Abou Kanani -- Safrawi	95			1	10.1785
Abou Kanani -- Sari Ulak	93			1	14.2124
Abou Kanani -- Sorani	95			2	7.47359
Abou Satl Mohazam -- Jlot	96	0	0.233	0	21.3417	x
Abunara -- Chetoui	95	0	0.283	0	8.21024	x
Abunara -- Gerboua	95	0	0.292	0	10.8944	x
Abunara -- Gordal Sevillana	95	0	0.265	0	7.2566	x
Abunara -- Hendero	95	0	0.324	0	6.73332	x
Abunara -- Itrana	95	0	0.284	0
Abunara -- Megaron	95	0	0.301	0	6.55485	x
Abunara -- Meski	95	0	0.229	0	5.51056	x
Abunara -- Mlouki Blettech	95	0	0.247	0	12.6344	x
Abunara -- Negral de Préjano	95			1	5.36362
Abunara -- Olivo de Clavijo_1	95			0	9.33974
Abunara -- Olivo de Clavijo_4	95			1	4.91842
Abunara -- Olivo de Ribafrecha-2509	95			1	6.46263
Abunara -- R'Khami	95	0	0.282	0	8.45306	x
Abunara -- Royal	95			1	5.48332
Abunara -- Sinop no 5	95	0	0.305	0	7.10709	x
Abunara -- Souabaa Aljia	95	0	0.261	0
Abunara -- Toffehi Tataouine	95	0	0.213	0	4.70193	x
Abunara -- Verdal de Leza	95			2	4.80683
Acebuche de Autol -- Gordal Sevillana	96	0	0.257	0	5.2069	x
Acebuche de Autol -- Lumiaro	96	0	0.252	0
Acebuche de Autol -- Olivo de Mancha Real	96	0	0.265	0
Acebuche de Caravaca-800 -- Lechín de Granada	96	0	0.286	0	10.5208	x
Acebuchera -- Bouchouika	96			1	6.48116
Acebuchera -- Buidiego	96			1	9.6092
Acebuchera -- Carrasqueño de la Sierra	96			1	5.61053
Acebuchera -- Castellana	96	0	0.348	0	12.9324	x
Acebuchera -- Cordovil de Serpa	96			1	5.81808
Acebuchera -- Lechín de Granada	96	0	0.282	0	7.07351	x
Acebuchera -- Manzanilla Cacereña	96			1	6.50496
Acebuchera -- Ojo de Liebre	96			1	8.38528
Acebuchera -- Pajarera	96			1	4.78211
Acebuchera -- Pavo	96			0	13.499
Acebuchera -- Pico Limón	96			1	6.84972
Acebuchera -- Picudo Blanco de Estepa	96	0	0.319	0	9.54249	x
Acebuchera -- Racimal	96			2	6.50335
Acebuchera -- Tachuno	95			1	6.46511
Acebuchera -- Verdial de Alcaudete	94			1	4.68215
Acebuchina de Frigiliana -- Aimel	94			2	8.89021
Acebuchina de Frigiliana -- Balhi Sig	95			2	12.2922
Acebuchina de Frigiliana -- Desconocido de Alcanadre_1	89			1	6.84071
Acebuchina de Frigiliana -- Desconocido de Alcanadre-2505	94			2	10.4499
Acebuchina de Frigiliana -- Desconocido de Cortija de la Viana	94			2	9.1995
Acebuchina de Frigiliana -- El Chatan	95			2	9.82243
Acebuchina de Frigiliana -- Mignolo Cerretano	95			2	6.9261
Acebuchina de Frigiliana -- Olivo di Mandanici	95			1	13.6276
Acebuchina de Frigiliana -- Olivo Gordo de Benisalte	94			1	14.3892
Aceitunero de Préjano -- Cordobés de Cornago	96	0	0.292	0	7.50072	x
Aceitunero de Préjano -- Gordal de Somontano	96			1	5.79772
Aceitunero de Préjano -- Grossanne	96			1	4.89948
Aceitunero de Préjano -- Longue de Meliana	96			1	7.65035
Aceitunero de Préjano -- Marsaline-1509	96			1	9.56823
Aceitunero de Préjano -- Olivo de Alberite	96			1	7.01683
Aceitunero de Préjano -- Toffehi Tataouine	96	0	0.247	0	10.1997	x
Aceitunero de Préjano -- Verdale de l'Hérault	96	0	0.337	0	12.7721	x
Aceitunero-2249 -- Bolvino	96	0	0.256	0	18.0923	x
Aceitunero-2249 -- Claramunt	96			2	4.69134
Aceitunero-2249 -- Macho de Galilea	96			1	12.4119
Aceitunero-2249 -- Nación	95			1	9.97265
Aceitunero-2249 -- Olivo de Murillo de Río Leza	96			1	4.86672
Aceituno de Alberite -- Cerruda de Liesa	95			1	8.29544
Aceituno de Alberite -- Cordobés de Cornago	96			1	9.71199
Aceituno de Alberite -- Desconocido de Cornago	96			2	6.16434
Aceituno de Alberite -- Desconocido de Ribafrecha-2511	96			1	7.59608
Aceituno de Alberite -- Desconocido de Sojuela_1	96			1	6.34015
Aceituno de Alberite -- Gordal Sevillana	96	0	0.213	0	5.55233	x
Aceituno de Alberite -- Konservolia	96			1	7.29911
Aceituno de Alberite -- Morisca de Mancor	96			1	6.71158
Aceituno de Alberite -- Olivo de Clavijo_2	96			1	5.47321
Aceituno de Alberite -- Olivo de Villamediana	96			1	8.79359
Aceituno de Alberite -- Toffehi Tataouine	96			1	5.24761
Aceituno de Alberite -- Verdal de Leza	96			2	5.00471
Aeleh -- Bottone di Gallo	96			2	18.1564
Aeleh -- Boughenfous	96	0	0.327	0	16.3449	x
Aeleh -- Chemlal de Kabylie	96			1	6.44036
Aeleh -- Desconocido de Alcanadre-2505	95			1	10.7504
Aeleh -- Desconocido de Ibiza_3	95			2	7.03789
Aeleh -- Dhokkar Nafti	96			2	5.17136
Aeleh -- Mignolo Cerretano	96			2	4.80412
Aeleh -- Olivo de l'Albera	96			2	5.03663
Agac no 7 (K. Maras) -- Humaisi	95			2	8.69876
Agac no 7 (K. Maras) -- Killin	95			1	11.1382
Agac no 7 (K. Maras) -- Majhol-1059	95	0	0.203	0	12.4849	x
Agac no 7 (K. Maras) -- Majhol-1122	93			2	6.10331
Agac no 7 (K. Maras) -- Shame	95			1	9.05203
Agac no 7 (K. Maras) -- Zaity	95	0	0.254	0	20.4757	x
Aggizi Akse -- Aggizi Oshime	95	0	0.314	0	28.0923	x
Aggizi Akse -- Aggizi Shame	95	0	0.308	0	24.7472	x
Aggizi Akse -- Baid El Hamam	95			2	12.8462
Aggizi Akse -- Balady	95			2	12.0491
Aggizi Akse -- Toffahi	95			1	15.4005
Aggizi Akse -- Zard	95			1	9.5498
Aggizi Oshime -- Aggizi Shame	96			2	17.7769
Aggizi Oshime -- Balady	96	0	0.239	0	27.6329	x
Aggizi Shame -- Baid El Hamam	96	0	0.271	0	28.3591	x
Aggizi Shame -- Toffahi	96	0	0.306	0	26.9376	x
Aghchren de Titest -- Bidh Hmam	96	0	0.239	0	7.64146	x
Aghchren de Titest -- Gordal Sevillana	96	0	0.217	0	11.099	x
Aghchren de Titest -- Marantelli	96			1	9.15665
Aghchren de Titest -- Meski	96			1	9.46028
Aghchren de Titest -- Moresca	96			2	5.36815
Aghchren de Titest -- Morisca de Mancor	96	0	0.287	0	13.385	x
Aghchren de Titest -- Roalejo de Arnedo	96			2	4.72294
Aglandau -- Arboset	96	0	0.301	0	7.81058	x
Aglandau -- Curnet	95			1	6.4291
Aglandau -- Dopia Verias	96			1	7.90591
Aglandau -- Gordal Sevillana	96	0	0.224	0
Aglandau -- Gorvele	96			1	6.31079
Aglandau -- Kokerrmadh Elbasani	96			1	5.1554
Aglandau -- Konservolia	96			1	4.98366
Aglandau -- Macho de Galilea	96			1	5.08508
Aglandau -- Morisca de Mancor	96			1	4.90487
Aglandau -- Olivo de Murillo de Río Leza	96	0	0.31	0
Aglandau -- Redondilla de Logroño	96			1	5.98815
Aglandau -- Samsun Salamuralik	96			1	9.64135
Agouromanakolia -- Ayvalik	96	0	0.341	0	17.3792	x
Agouromanakolia -- Domat	96			2	8.04984
Agouromanakolia -- Domengues	96			2	9.9866
Agouromanakolia -- Grossal de Bovera	95			2	10.3792
Agouromanakolia -- Kokerrmadh Elbasani	96			1	15.3456
Agouromanakolia -- Kothreiki	96			1	18.5791
Agouromanakolia -- Majhol-1122	94			1	7.22809
Agouromanakolia -- Manzanella del Mezquin	95			2	8.64823
Agouromanakolia -- Memecik	96			1	5.05954
Agouromanakolia -- Memeli	95			2	6.78404
Agouromanakolia -- Moixonenca de Rafels	95			2	10.2343
Agouromanakolia -- Negral de Bierge	96			2	14.3273
Agouromanakolia -- Reixonenca	96			1	13.4703
Agouromanakolia -- Royal de Sabiñán	96			2	8.53345
Agouromanakolia -- Safrawi	96	0	0.303	0	15.9157	x
Agouromanakolia -- Sorani	96			2	5.15017
Agouromanakolia -- Tebabs	96			1	10.1335
Agouromanakolia -- Tefah	96	0	0.227	0
Agouromanakolia -- Tío Blas	96			2	6.4761
Agouromanakolia -- Toffehi Tataouine	96	0	0.286	0	16.6751	x
Aharoune -- Bouchouk Lafayette	95	0	0.309	0	12.5414	x
Aharoune -- Chemlal de Kabylie	95	0	0.273	0	9.90687	x
Aharoune -- Ifiri	94			2	4.96053
Ahia-Ousbaa -- Ampolleta	96			1	5.07595
Ahia-Ousbaa -- Jemri Bouchouka	96	0	0.218	0	9.14515	x
Ahia-Ousbaa -- Khadraia	96	0	0.261	0	15.0841	x
Ahia-Ousbaa -- Meskyet Dawla Gafsa	96			2	5.98107
Ahia-Ousbaa -- Thiaki	96	0	0.254	0
Aimel -- Balhi Sig	95			1	7.71997
Aimel -- Berri Meslal_3	95			1	5.87243
Aimel -- Bouricha	95			1	11.9027
Aimel -- Caninese	95	0	0.346	0	14.9916	x
Aimel -- Chemlal de Kabylie	95			1	6.83949
Aimel -- Chemlali Meliane	95			2	4.70372
Aimel -- Chemlali Zarzis	95			1	11.3294
Aimel -- Desconocido de Alcanadre_1	91	0	0.317	0
Aimel -- Desconocido de Ibiza_3	94			2	5.25177
Aimel -- Dhokkar Nafti	95			1	12.2155
Aimel -- El Chatan	95			1	12.4299
Aimel -- El Kharfi	95			1	11.2023
Aimel -- Empeltre	95	0	0.295	0	6.6678	x
Aimel -- Jeddari Chaal	95			1	9.94783
Aimel -- Jemri Dhokkar-1732	95			1	11.9071
Aimel -- Lianolia Kerkyras	95			2	6.71317
Aimel -- Liguria	95			2	5.28572
Aimel -- Llei del Bessó	95			1	12.6851
Aimel -- Menya	95	0	0.325	0	7.9306	x
Aimel -- Mfartah Blettech	95			2	6.10445
Aimel -- Mignolo Cerretano	95			0	11.4067
Aimel -- Montrroy	94			1	5.35204
Aimel -- Neb Tataouine	95	0	0.351	0	14.524	x
Aimel -- Negret	94			1	8.80447
Aimel -- Olivastra di Populonia	95			1	10.0907
Aimel -- Olivastra Seggianese	95			0	15.3926
Aimel -- Olivo de l'Albera	95			2	8.29843
Aimel -- Olivo di Mandanici	95	0	0.331	0	8.84269	x
Aimel -- Rougette de Pignan	93			1	4.79791
Aimel -- Semni Djebeniana	95			2	9.0854
Aimel -- Takesrit	94			0	13.6556
Aimel -- Thiaki	95			0	8.38284
Aimel -- Ulliri i Bardhe i Tiranes-2499	95			1	11.5827
Aimel -- Zeitoun Boubezzoula	95			1	12.9529
Aitana -- Karydolia	96			2	6.73866
Aitana -- Kokerrmadh Elbasani	96	0	0.222	0	14.8283	x
Aitana -- Negral de Préjano	96			1	6.1386
Aitana -- Nocellara del Belice	96			1	5.61809
Aitana -- Safrawi	96	0	0.261	0	14.5394	x
Aitana -- Ulliri i Bardhe i Tiranes	96			2	4.85248
Aixalà -- Arbequina	96	0	0.337	0	21.6317	x
Aixalà -- Ayvalik	96	0	0.264	0	14.4927	x
Aixalà -- Dolce Agogia	96	0	0.26	0	10.9502	x
Aixalà -- Siurona	95			1	12.3143
Aixalà -- Toffehi Tataouine	96			2	6.64135
Aixalà -- Verdiell	96			1	10.0041
Ak Zeytin -- Dolce Agogia	94			1	7.64108
Ak Zeytin -- Kokerrmadh Elbasani	94			2	9.3398
Ak Zeytin -- Safrawi	94			2	10.7934
Akenane -- Koroneiki	96			1	5.68321
Akerma -- Aloreña	96			1	5.47111
Akerma -- Azeradj	96			2	4.96753
Akerma -- Bodoquera	96			1	4.80299
Akerma -- Desconocido de Alberite	96			1	4.73952
Akerma -- Dopia Verias	96			1	4.89962
Akerma -- Gordal Sevillana	96	0	0.277	0	11.0521	x
Akerma -- Machazo de Ribafrecha	96			1	7.6054
Akerma -- Negrillo de Ausejo	95			1	6.41486
Akerma -- Nocellara Messinese	96	0	0.289	0	12.9142	x
Akerma -- Olivo de Villamediana	96			1	6.06024
Akerma -- Pizz'e Carroga	96			1	5.76469
Alameño Blanco -- Asnal	96	0	0.345	0	12.93	x
Alameño Blanco -- Desconocido de Toledo_2	96			1	6.49456
Alameño Blanco -- Lechín de Granada	96	0	0.252	0	5.99836	x
Alameño Blanco -- Machorrón	96			2	5.13655
Alameño Blanco -- Madural de Mallorca	95			1	5.96688
Alameño Blanco -- Mollar de Cieza	96			1	7.38563
Alameño Blanco -- Racimal	96			2	5.38196
Alameño Blanco -- Salgar Redondo	96			2	5.32818
Alameño Blanco -- Toruno	96	0	0.315	0	9.5355	x
Alameño de Cabra -- Barouni	96	0	0.347	0	7.87756	x
Alameño de Cabra -- Buidiego	96			1	8.08348
Alameño de Cabra -- Cordovil de Serpa	96	0	0.315	0
Alameño de Cabra -- Desconocido de Jabalcuz	96	0	0.303	0
Alameño de Cabra -- Gordal Sevillana	96	0	0.243	0
Alameño de Cabra -- Lechín de Granada	96	0	0.267	0
Alameño de Cabra -- Manzanilla Cacereña	96	0	0.328	0
Alameño de Cabra -- Manzanilla de Alfarnatejo	95			1	5.21522
Alameño de Cabra -- Manzanillo Cordobés de Cabra	96	0	0.353	0	8.49332	x
Alameño de Cabra -- Olivo de Mancha Real	96	0	0.35	0	5.14674	x
Alameño de Cabra -- Olivo de Maura	96			1	4.84742
Alameño de Cabra -- Picudo Blanco de Estepa	96			1	5.41527
Alameño de Montilla -- Barouni	96			1	4.94793
Alameño de Montilla -- Blanquillo fino	94	0	0.309	0	8.05025	x
Alameño de Montilla -- Cordovil de Serpa	96	0	0.331	0
Alameño de Montilla -- Gordal Sevillana	96	0	0.279	0	6.99613	x
Alameño de Montilla -- Lechín de Granada	96	0	0.248	0
Alameño de Montilla -- Llei de Cadaqués	95	0	0.278	0	4.98586	x
Alameño de Montilla -- Manzanil de Piedra Buena-489	96			1	5.19551
Alameño de Montilla -- Morisca	96	0	0.325	0
Alameño de Montilla -- Negrillo Redondo	96			1	8.78499
Alameño de Montilla -- Pajarera	96	0	0.328	0	5.23921	x
Alameño de Montilla -- Redondilla de Logroño	96	0	0.327	0	5.18903	x
Alameño de Montilla -- Santa Martinenga	96	0	0.287	0
Alameño de Montilla -- Varudo	96			1	4.73945
Albacarro -- Cua de cirera	94	0	0.255	0	9.04461	x
Albacarro -- Desconocido de Cornago	95	0	0.244	0	13.7177	x
Albacarro -- Desconocido de Ribafrecha-2511	95	0	0.3	0	8.09063	x
Albacarro -- Desconocido de Toledo_2	95	0	0.302	0	5.63684	x
Albacarro -- Gordal Sevillana	95	0	0.237	0	5.23873	x
Albacarro -- Grosal Vimbodí	95	0	0.223	0	7.14929	x
Albacarro -- Hendero	95			0	10.1796
Albacarro -- Negrillo de Ausejo	94			1	4.83127
Albacarro -- Neral	95			1	7.13436
Albacarro -- Rañinera	95	0	0.307	0	7.26306	x
Albacarro -- Thassitiki	94			1	4.93218
Albacarro -- Verdal de Leza	95			1	8.02611
Albacarro -- Verdal de Ribafrecha	95			1	5.72491
Albareta -- Arroniz	94			1	6.7251
Albareta -- Desconocido de Ribafrecha_1	94	0	0.247	0
Albareta -- Olivo de Clavijo_2	94			1	5.673
Albareta -- Roalejo de Arnedo	94			1	5.72799
Albareta -- Royal de Calatayud	94			1	4.89607
Albas -- Cucca	95			2	4.83057
Albas -- Négrette	95	0	0.255	0
Albas -- Royal de Calatayud	95	0	0.293	0	12.3649	x
Albas -- Verdiell	95	0	0.257	0	8.75422	x
Albatro -- Frantoio	95	0	0.275	0	11.8145	x
Albatro -- Morchiaio	95			1	5.1234
Albatro -- Olivastra Seggianese	95	0	0.298	0	5.08438	x
Alfafara -- Azapa	96	0	0.327	0	11.2857	x
Alfafara -- Brava	96			0	18.4801
Alfafara -- Gordal Sevillana	96	0	0.192	0
Alfafara -- Lechín de Granada	96	0	0.241	0
Alfafara -- Olivo Gordo de Jinegros	96			1	5.27858
Alfafara -- Salgar Redondo	96			1	7.28717
Alfredico -- Carrasqueño de Alcaudete	96			1	6.66568
Alfredico -- Chorrúo de Castro del Río	96			2	4.90062
Alfredico -- Gordal Sevillana	96	0	0.204	0
Alfredico -- Hojiblanca	96			2	6.57976
Alfredico -- Lechín de Granada	96	0	0.225	0
Alfredico -- Negro del Carpio	96	0	0.312	0	9.48752	x
Alfredico -- Verdial de Alcalá la Real	95			1	4.94249
Alía -- Aghchren de Titest	96			2	5.08227
Alía -- Bouteillan	96			1	7.9549
Alía -- Cerruda de Olvena	96			1	4.75971
Alía -- Desconocido de Alberite	96	0	0.348	0	13.9504	x
Alía -- Desconocido de Arnedo	96			1	4.83139
Alía -- Gordal Sevillana	96	0	0.255	0	7.48092	x
Alía -- Grossanne	96	0	0.33	0	8.96502	x
Alía -- Marsaline-1684	96	0	0.274	0
Alía -- Merhavia	96			1	4.68614
Alía -- Morisca de Mancor	96			1	6.40737
Alía -- Olivo de Lagunilla de Jubera	96			1	7.15264
Alía -- Picudillo	96	0	0.311	0	11.6499	x
Alía -- Samsun Salamuralik	96			1	5.08183
Allora -- Moraiolo	96			1	9.68079
Aloreña -- Amygdalolia Nana	96			1	5.02623
Aloreña -- Azeradj	96			1	4.65202
Aloreña -- Gordal de Somontano	96			0	9.48015
Aloreña -- Manzanilla Baquetera	91	0	0.304	0
Aloreña -- Meskyet Dawla Gafsa	96			1	4.93223
Aloreña -- Picudo Mohedano	95	0	0.32	0	14.7869	x
Aloreña -- Toffehi Tataouine	96	0	0.247	0	7.34121	x
Aloreña -- Verdial de Vélez-Málaga	96	0	0.216	0	6.48992	x
Aloreña de Iznalloz -- Lechín de Granada	96	0	0.207	0
Aloreña de Iznalloz -- Nevadillo Negro-2282	96			1	6.23399
Aloreña-829 -- Buga	96			2	9.48667
Aloreña-829 -- Buharica	95			2	9.09625
Aloreña-829 -- Carrasqueño de Elvas	96	0	0.286	0	6.86368	x
Aloreña-829 -- Gordal Sevillana	96	0	0.237	0	10.17	x
Aloreña-829 -- Macho de Vilches	96			1	5.19056
Aloreña-829 -- Mansa	96	0	0.231	0
Aloreña-829 -- Morchiaio	96	0	0.235	0	8.92722	x
Aloreña-829 -- Simjaca	96			2	5.90265
Aloreña-829 -- Velika Lastovka	96			2	5.35119
Aloreña-829 -- Villalonga	96			1	6.69699
Alquecerana -- Claramunt	96			1	8.41947
Alquecerana -- Desconocido de Clavijo_4	96			1	5.21096
Alquecerana -- Neral	96	0	0.321	0	16.9869	x
Alquecerana -- Olivo de Ribafrecha-2509	96			2	5.16806
Alquecerana -- Picudo de Bergasa	96	0	0.247	0	8.90567	x
Alquecerana -- Roieta	96			1	8.6452
Alquecerana -- Royal de Calatayud-47	96			2	5.18891
Amargoso -- Arboset	96	0	0.333	0	9.91086	x
Amargoso -- Bidh Hmam	96			1	5.44304
Amargoso -- Dopia Verias	96			1	7.1445
Amargoso -- Gordal Sevillana	96	0	0.25	0	6.78478	x
Amargoso -- Mançanal d'Arnes	95			1	5.63028
Amargoso -- Moresca	96	0	0.291	0	7.55274	x
Amargoso -- Olivo de Logroño	96			1	6.66778
Amargoso -- Olivo de Villamediana	96			1	6.02025
Amargoso -- Royal	96			1	6.31616
Amargoso -- Semidana	96	0	0.302	0	8.15556	x
Amargoso -- Toffehi Tataouine	96	0	0.219	0	5.5937	x
Americano -- Frantoio	96	0	0.227	0	12.7339	x
Americano -- Grappolo	96	0	0.323	0	19.9538	x
Americano -- Gremignolo di Bolgheri	96	0	0.327	0	14.5467	x
Americano -- Piangente	95	0	0.29	0	13.692	x
Ampolleta -- Farga	96	0	0.267	0	10.8316	x
Ampolleta -- Figueretes	95			2	7.09348
Amygdalolia Nana -- Buža	96	0	0.255	0	7.11626	x
Amygdalolia Nana -- Gordal Sevillana	96	0	0.207	0	5.47405	x
Amygdalolia Nana -- Izmir Sofralik	96			1	7.4795
Amygdalolia Nana -- Karydolia	96	0	0.299	0	14.5054	x
Amygdalolia Nana -- Kolybada	96	0	0.256	0	8.58902	x
Amygdalolia Nana -- Memeli	95			1	9.59934
Amygdalolia Nana -- Mochuto	96	0	0.323	0	11.4847	x
Amygdalolia Nana -- Olivo de Leza	96			1	6.34486
Amygdalolia Nana -- Olivo de Sojuela	96			1	5.22177
Araban -- Grassois	95			1	12.4565
Araban -- Moraiolo	95	0	0.25	0	11.6989	x
Arabi Altafeleh -- Blanqueta	96			1	5.42008
Arabi Altafeleh -- Chemlali Sfax	95	0	0.279	0	8.77133	x
Arbequí Blanc -- Arbequina	96			1	14.204
Arbequí Blanc -- Grosal Vimbodí	96			1	16.9136
Arbequí Blanc -- Verdal del Pallars	95	0	0.184	0	9.99966	x
Arbequina -- Arbosana	96	0	0.288	0	12.8943	x
Arbequina -- Ayvalik	96			1	5.99281
Arbequina -- Blanqueta	96			1	9.16642
Arbequina -- Casas	96	0	0.242	0	11.4353	x
Arbequina -- Chiquitita	96	0	0.202	0	8.46632	x
Arbequina -- Desconocido de Écija	96	0	0.264	0	6.95367	x
Arbequina -- Dolce Agogia	96			1	6.2022
Arbequina -- Grosal Vimbodí	96	0	0.239	0	13.9668	x
Arbequina -- Jemri Dhokkar-1907	96			2	4.96149
Arbequina -- Llei del Bessó	96			1	6.50024
Arbequina -- Martina	87	0	0.24	0	21.33	x
Arbequina -- Miquel Vilaseca	95	0	0.27	0	16.5963	x
Arbequina -- Neb Djemel	96			2	4.96528
Arbequina -- Panseñera	96			1	7.09196
Arbequina -- Perafort	96	0	0.287	0	12.9682	x
Arbequina -- Pidicuddara	96			1	5.66969
Arbequina -- Selection-6	95	0	0.255	0	9.6573	x
Arbequina -- Selection-7	93	0	0.278	0	11.8155	x
Arbequina -- Sikitita_2	96	0	0.232	0	9.92442
Arbequina -- Siurona	95	0	0.301	0	16.3606	x
Arbequina -- Toffehi Tataouine	96			1	5.27017
Arbequina -- Unknown OT2	96			2	7.037
Arbequina -- Vinyols	95	0	0.262	0	9.24458	x
Arbequina -- Zeitoun Boubezzoula	96			2	4.80794
Arbosana -- Cástula	96	0	0.289	0	20.2303	x
Arbosana -- Neb Tataouine	96			1	6.57503
Arbosana -- Negret	95			1	4.97896
Arbosana -- Royeta de Asque	96			1	5.01123
Arbosana -- Selection-5	95			1	10.2823
Arbosana -- Selection-8	90	0	0.279	0	16.6544	x
Arbosana -- Urgavona	96	0	0.305	0	21.7071	x
Arbosana -- Vaneta	96			1	12.051
Arboset -- Desconocido de Alberite	96	0	0.253	0
Arboset -- Dopia Verias	96			1	10.0828
Arboset -- Gemlik	96	0	0.319	0	13.0712	x
Arboset -- Gordal Sevillana	96	0	0.258	0	7.7789	x
Arboset -- Hendero	96	0	0.308	0
Arboset -- Itrana	96	0	0.278	0
Arboset -- Machazo de Ribafrecha	96			1	5.93107
Arboset -- Manzanilla Baquetera	91	0	0.259	0
Arboset -- Mollar Basto	96	0	0.264	0
Arboset -- Olivo de Logroño	96			1	8.36897
Arboset -- Olivo de Villamediana	96	0	0.3	0	8.54368	x
Arboset -- Samanli	95	0	0.25	0	10.5935	x
Arboset -- Samsun Salamuralik	96	0	0.307	0	8.67942	x
Arboset -- Sati	96			2	5.04966
Arboset -- Sevillano de Jumilla	96	0	0.282	0
Arboset -- Sinop no 6	96			1	6.49716
Argudell -- Gordal Sevillana	94	0	0.253	0	5.49205	x
Argudell -- Olivo de Mancha Real	94	0	0.267	0
Argudell -- Ombligón	94	0	0.312	0	6.72462	x
Argudell -- Picuda de Luis	94	0	0.267	0	5.9186	x
Argudell -- Vinyols	93	0	0.294	0	5.82932	x
Arracada d'Aldover -- Farga	96			0	9.72722
Arroniz -- Chalkidikis	96	0	0.265	0
Arroniz -- Desconocido de Alberite	96			1	4.72341
Arroniz -- Desconocido de Tudelilla	96	0	0.292	0	15.5043	x
Arroniz -- Desconocido de Villamediana_2	96	0	0.302	0	10.6484	x
Arroniz -- Gordal Sevillana	96	0	0.229	0	5.21706	x
Arroniz -- Bigarude	96	0	0.283	0
Arroniz -- Hendero	96			0	9.52873
Arroniz -- Macho de Galilea	96	0	0.319	0	14.3448	x
Arroniz -- Olivo de Clavijo_2	96	0	0.291	0	6.21313	x
Arroniz -- Olivo de Clavijo_4	96	0	0.316	0	9.94191	x
Arroniz -- Olivo de Ribafrecha-2512	96			1	6.37284
Arroniz -- Olivo de Santa Engracia	96	0	0.282	0
Arroniz -- Toffehi Tataouine	96	0	0.228	0	6.70177	x
Arroniz -- Velika Lastovka	96	0	0.255	0	7.31708	x
Ascolana Huasco -- Azapa	96	0	0.245	0	13.3982	x
Ascolana Huasco -- Empeltre	96	0	0.24	0	12.2461	x
Ascolana Huasco -- Gordal de Vélez Rubio	96			1	10.0286
Ascolana Tenera -- Bouteillan	96			1	5.16686
Ascolana Tenera -- Datilero	96			1	5.83443
Ascolana Tenera -- Favolosa	95	0	0.222	0	18.1476	x
Ascolana Tenera -- Gordal Sevillana	96	0	0.211	0	6.3448	x
Ascolana Tenera -- Iliturgitana	96	0	0.248	0	11.201	x
Ascolana Tenera -- Morchiaio	96	0	0.269	0	11.7717	x
Ascolana Tenera -- Olivo del Mulino	96			2	7.04244
Ascolana Tenera -- Polinizador	96	0	0.26	0	12.5778	x
Asnal -- Barouni	96			2	4.9084
Asnal -- Gordal Sevillana	96	0	0.204	0
Asnal -- Lechín de Granada	96	0	0.259	0	4.86347	x
Asnal -- Mollar de Cieza	96	0	0.321	0	10.1707	x
Ayrouni-1599 -- Janude_1	96			2	9.33942
Ayrouni-1599 -- Majhol-1059	96			2	7.41795
Ayrouni-1599 -- Majhol-1122	94			2	5.34434
Ayrouni-1599 -- Megaron	96			1	8.18911
Ayrouni-1599 -- Negral de Préjano	96			1	6.54541
Ayrouni-1599 -- Tebabs	96			2	9.00579
Ayrouni-1599 -- Toffahi-SYR	96	0	0.322	0	17.6748	x
Ayrouni-1599 -- Zaity	96			2	9.88546
Ayvalik -- Fossenca	93	0	0.255	0
Ayvalik -- Fram	96			2	8.43863
Ayvalik -- Grossal de Bovera	95			1	14.0511
Ayvalik -- Jeddari Chaal	96	0	0.222	0
Ayvalik -- Kokerrmadh Elbasani	96	0	0.258	0	12.5563	x
Ayvalik -- Koroneiki	96	0	0.24	0	8.133	x
Ayvalik -- Kothreiki	96			1	16.2676
Ayvalik -- Koutsourelia	96	0	0.266	0	12.8454	x
Ayvalik -- Leccio Maremmano	95			1	7.15779
Ayvalik -- Lianolia Kerkyras	96	0	0.226	0
Ayvalik -- Llei de Cadaqués	95	0	0.26	0	6.15088	x
Ayvalik -- Managjel	96	0	0.245	0	8.44414	x
Ayvalik -- Manzanella del Mezquin	95			1	14.3076
Ayvalik -- Mastoidis	96			1	10.4314
Ayvalik -- Memeli	95	0	0.203	0	11.9842	x
Ayvalik -- Moraiolo	96	0	0.304	0	11.1289	x
Ayvalik -- Muixonenca de Torre d' Arques	96	0	0.352	0	18.753	x
Ayvalik -- Neb Djemel	96	0	0.26	0	6.40838	x
Ayvalik -- Negral de Bierge	96			2	8.65899
Ayvalik -- Ogliarola del Vulture	96			1	8.06507
Ayvalik -- Morisca Picuilla	96	0	0.262	0	6.30099	x
Ayvalik -- Olivo de Sojuela	96	0	0.26	0
Ayvalik -- Panseñera	96			1	12.7196
Ayvalik -- Reixonenca	96			1	10.5618
Ayvalik -- Rosciola	96	0	0.235	0	8.34637	x
Ayvalik -- Rossellino	96			1	4.81053
Ayvalik -- Royal de Calatayud-47	96			0	20.1963
Ayvalik -- Royal de Sabiñán	96	0	0.308	0	16.4594	x
Ayvalik -- Safrawi	96	0	0.302	0	13.3066	x
Ayvalik -- Semni Djebeniana	96	0	0.204	0
Ayvalik -- Siurona	95			1	8.02788
Ayvalik -- Smertolia	95	0	0.185	0	6.73662	x
Ayvalik -- Souidi	96	0	0.21	0
Ayvalik -- Thiaki	96	0	0.296	0
Ayvalik -- Toffehi Tataouine	96			1	13.633
Ayvalik -- Ulliri i Bardhe i Tiranes	96			1	11.3468
Ayvalik -- Verdal de Figols	96			1	11.8819
Ayvalik -- Zuzorka	96	0	0.232	0	5.23499	x
Azapa -- Carrasqueña de Cañada	96	0	0.327	0	6.89695	x
Azapa -- Carrasqueña Huasco	96	0	0.343	0	13.8872	x
Azapa -- Desconocido del cortijo de Don Pedro	96			1	4.89279
Azapa -- Gordal Sevillana	96	0	0.23	0	4.84542	x
Azapa -- Habichuelero de Baena	96			1	5.5966
Azapa -- Jaropo	96			1	4.94284
Azapa -- Lechín de Granada	96	0	0.248	0
Azapa -- Macho de Vilches	96			1	6.85403
Azapa -- Manzanilla de Agua	96	0	0.325	0	9.00205	x
Azapa -- Nevado Rizado	96			1	7.43875
Azapa -- Olivo de Mallorca_1	96			1	9.26338
Azapa -- Rara de Cabra	96			2	7.42909
Azapa -- S:27_4	95	0	0.25	0	6.75546	x
Azeboudi de Kirane-1549 -- Blanqueta	96			1	4.82831
Azeboudi de Kirane-1549 -- Jeddari Chaal	96			1	5.97436
Azeboudi de Kirane-1549 -- Jemri Bouchouka	96	0	0.193	0	8.35768	x
Azeboudi de Kirane-1549 -- Meskyet Dawla Gafsa	96			1	7.28877
Azeboudi de Kirane-1549 -- Zuzorka	96			1	5.15072
Azeboudi de Kirane-1659 -- Khadraia	95			2	4.80807
Azul -- Buidiego	96			2	5.78918
Azul -- Chorrúo	96	0	0.296	0	4.71373	x
Azul -- Chorrúo de Castro del Río	96			1	7.55236
Azul -- Cobrancosa	96			1	6.27021
Azul -- Desconocida de Fuente Santa	96			1	8.76401
Azul -- Desconocido de Santa Fe	96			1	6.94372
Azul -- Desconocido de Toledo_2	96			0	13.3546
Azul -- Gordal Sevillana	96	0	0.228	0	5.38638	x
Azul -- Habichuelero de Grazalema	96			1	4.78099
Azul -- Lechín de Granada	96	0	0.254	0
Azul -- Llorón de Atarfe	96			1	6.0137
Azul -- Manzanilla de Alfarnatejo	95			1	6.53803
Azul -- Manzanilla del Piquito	96			1	6.75393
Azul -- Mollar de Cieza	96			1	5.77679
Azul -- Nevadillo de Santisteban Pto	96			1	6.1511
Azul -- Nevadillo Negro	96			1	7.21378
Azul -- Nevado Rizado	96			2	5.63946
Azul -- Ocal de Alburquerque	96			1	5.71797
Azul -- Racimal	96			1	9.17643
Azul -- Tachuno	95			2	7.42854
Baid El Hamam -- Toffahi	96			2	18.3488
Baladi -- Baladi Remadieh-2082	96	0	0.293	0	19.8085	x
Baladi -- Bathni	96			2	10.7277
Baladi -- Bed al Igel	96	0	0.294	0	20.5489	x
Baladi -- Humaisi	96			2	11.2674
Baladi -- Karamani	96			1	18.5704
Baladi -- Karamani-1564	96			1	17.7178
Baladi -- Kato Drys	96	0	0.333	0	28.5608	x
Baladi -- Kerdi	96			1	17.1806
Baladi -- Kfarzeta-2501	96	0	0.267	0	18.4263	x
Baladi -- Khalkhali	96			1	18.3152
Baladi -- Khalkhali-1595	96			2	12.4731
Baladi -- Maarri	96			1	14.0209
Baladi -- Majhol-1059	96	0	0.322	0	21.2291	x
Baladi -- Manakiri	92			1	8.28394
Baladi -- Safrawi	96	0	0.231	0	13.1654	x
Baladi -- Sorani	96	0	0.25	0	15.0095	x
Baladi -- Tarabelsi	96	0	0.286	0	25.0211	x
Baladi Hermel-2074 -- Gordal de Somontano	95	0	0.267	0	5.47555	x
Baladi Hermel-2074 -- Idleb	95			1	6.21386
Baladi Hermel-2074 -- Janude_1	95			1	7.63095
Baladi Hermel-2074 -- Maarri	95			1	10.4627
Baladi Hermel-2074 -- Majhol-1122	93			2	4.67987
Baladi Hermel-2074 -- Shame	95			1	7.30037
Baladi Hermel-2074 -- Shami	93			2	7.02706
Baladi Hermel-2074 -- Shami Modabl	95			1	10.9365
Baladi Hermel-2074 -- Zada	94			2	9.88329
Baladi Hermel-2074 -- Zael Almuhra	95			2	8.37858
Baladi Hermel-2074 -- Zaity	95			2	8.58032
Baladi Remadieh-2082 -- Bathni	96			2	5.00746
Baladi Remadieh-2082 -- Kato Drys	96			2	11.0063
Baladi Remadieh-2082 -- Majhol-1059	96			1	11.8803
Baladi Remadieh-2082 -- Safrawi	96			2	4.88706
Baladi Remadieh-2082 -- Tarabelsi	96			1	14.2476
Balady -- Barnea	95	0	0.193	0	12.6021	x
Balady -- Bez el Anza	96			1	8.08426
Balady -- D. de Egipto	96	0	0.226	0	11.7797	x
Balady -- Dolce	95	0	0.221	0	8.87035	x
Balady -- Sinawy	96			1	7.37627
Balady -- Toffahi	96			1	24.7421
Balady -- Wardan	96			1	8.90885
Balhi Sig -- Bottone di Gallo	96			0	23.2388
Balhi Sig -- Chemlali Ghraiba	95			2	6.64104
Balhi Sig -- Desconocido de El Patriarca_3	95			1	13.6248
Balhi Sig -- Desconocido de Ibiza_3	95			2	8.13991
Balhi Sig -- Jemri Dhokkar-1732	96			2	7.23764
Balhi Sig -- Mignolo	96	0	0.289	0	7.28925	x
Balhi Sig -- Olivo Gordo de Benisalte	95			1	9.6169
Balhi Sig -- Safrawi	96	0	0.185	0
Balhi Sig -- Takesrit	95			1	6.18059
Balhi Sig -- Unknown OT2	96			2	5.99573
Balhi Sig -- VS6	96			1	12.7156
Barnea -- Chemlali Sfax	94	0	0.25	0	9.85656	x
Barnea -- Sinawy	95			2	9.25979
Barouni -- Carrasqueño de la Sierra	96			1	6.77865
Barouni -- Cordovil de Serpa	96	0	0.325	0
Barouni -- Escarabajuelo de Posadas	96	0	0.336	0
Barouni -- Gordal Sevillana	96	0	0.243	0
Barouni -- Khuokhe	95	0	0.196	0
Barouni -- Lechín de Granada	96	0	0.267	0
Barouni -- Rara de Cabra	96			1	8.06714
Barouni -- Verdial de Alcalá la Real	95	0	0.339	0	6.63445	x
Barouni -- Vidrillo	95			1	5.08613
Barri -- Majhol-1122	94			2	4.66109
Barri -- Toffahi-SYR	96			1	7.82853
Bassiols -- Cornicabra	95	0	0.216	0	9.16584	x
Bassiols -- Desconocido de Clavijo_1	95	0	0.216	0	8.64071	x
Bassiols -- Memeli	94			2	11.3281
Bassiols -- Toffehi Tataouine	95			1	7.28198
Bathni -- Bent al Kadi	96			1	7.73997
Bathni -- Elmacik	96			2	5.1258
Bathni -- Jlot	96			1	12.6142
Bathni -- Karamani-1564	96			1	9.68388
Bathni -- Kerdi	96			2	8.58836
Bathni -- Khalkhali	96			2	11.3925
Bathni -- Maarri	96			2	7.83969
Bathni -- Majhol-1059	96	0	0.27	0	15.2401	x
Bathni -- Majhol-1122	94			2	6.57846
Bathni -- Mawi	96			1	12.7911
Bathni -- Rosai-2254	96	0	0.277	0	18.6388	x
Bathni -- Sari Ulak	94			2	5.23006
Bathni -- Sorani	96			1	6.64952
Bathni -- Toffahi-SYR	96	0	0.22	0	10.2303	x
Becarut -- Verdal de Manresa	94	0	0.273	0	9.24476	x
Béchude -- Rougette de l'Ardèche	94	0	0.295	0	19.9032	x
Bed al Igel -- Kato Drys	96			1	16.1546
Bed al Igel -- Majhol-1059	96			2	6.99068
Bed al Igel -- Safrawi	96			2	7.33413
Bed al Igel -- Sorani	96			1	13.352
Bed al Igel -- Tarabelsi	96			2	12.0607
Belluti -- Kan Celebi	95			2	8.52454
Belluti -- Safrawi	96			1	11.5563
Belluti -- Yag Celebi (Tatayn)	96	0	0.272	0	20.2554	x
Bent al Kadi -- Jlot	96	0	0.268	0	18.1868	x
Bent al Kadi -- Jlot-841	96			2	10.5669
Bent al Kadi -- Khuokhe	95	0	0.235	0	12.963	x
Bent al Kadi -- Majhol-1122	94			1	7.10121
Bent al Kadi -- Yaglik Celebi	95			2	10.2799
Berri Meslal_3 -- Chemlal de Kabylie	96			1	11.0073
Berri Meslal_3 -- Desconocido de Casarias	96			2	18.9642
Berri Meslal_3 -- Desconocido de la Albaida	96			2	6.33348
Berri Meslal_3 -- Dokkar	96			2	15.5863
Berri Meslal_3 -- Mrčakinja	96			1	11.1941
Berri Meslal_3 -- Negrilla de Cortijo Fraile	95			1	9.74451
Berri Meslal_3 -- Picholine Marocaine	96	0	0.252	0	12.7549	x
Berri Meslal_3 -- Unknown OZ1	96			2	13.3263
Berri Meslal_3 -- VS6	96			1	20.1628
Bez el Anza -- Chemlali Sfax	95	0	0.269	0	6.12092	x
Bez el Anza -- D. de Egipto	96			1	5.19624
Bez el Anza -- Desconocido de Ribafrecha_1	96	0	0.271	0
Bez el Anza -- Sinawy	96			1	5.3098
Bez el Anza -- Wardan	96			2	6.04547
Bianchera -- Ogliarola del Vulture	96	0	0.198	0	11.021	x
Biancolilla-1814 -- De Sal	95	0	0.24	0
Biancolilla-1814 -- Passulunara	96	0	0.299	0	13.9617	x
Bical -- Lechín de Granada	96	0	0.248	0
Bical -- Lentisca	96	0	0.239	0	12.6196	x
Bical -- Ocal de Alburquerque	96			1	5.08859
Bical -- Redondilla de Grazalema	96	0	0.316	0	5.61185	x
Bidh Hmam -- Gordal Sevillana	96	0	0.227	0
Bidh Hmam -- Grossanne	96			1	6.44371
Bidh Hmam -- Longue de Meliana	96			1	5.55342
Bidh Hmam -- Morisca de Mancor	96			1	5.4756
Bidh Hmam -- Picudillo	96			1	8.60519
Bidh Hmam -- Redondilla de Logroño	96			1	6.03969
Bidh Hmam -- Samsun Salamuralik	96	0	0.307	0	7.68091	x
Bidh Hmam -- Toffehi Tataouine	96			1	5.77786
Bidh Hmam -- Tonda Iblea	96	0	0.273	0	5.82167	x
Bidh Hmam -- Verdal del Pallars	95	0	0.3	0	7.32671	x
Biequeruda -- Escarabajo	96			1	5.83677
Biequeruda -- Gordal Sevillana	96	0	0.218	0	9.65874	x
Blanc -- Itrana	96			1	5.27373
Blanc -- Verdiell	96	0	0.266	0	9.80385	x
Blanqueta -- El Kharfi	96			1	6.32576
Blanqueta -- El Salam	96	0	0.262	0
Blanqueta -- Moncita	96	0	0.228	0	10.6277	x
Blanqueta -- Siurona	95			1	8.48663
Blanqueta -- Sollana	96			1	5.39635
Blanqueta -- Souidi	96			1	7.21325
Blanqueta -- Toffehi Tataouine	96			1	4.78839
Blanqueta -- Unknown OT2	96	0	0.241	0	16.8608	x
Blanquillo de Setenil -- Desconocido del cortijo de Don Pedro	96			1	8.27091
Blanquillo de Setenil -- Gordal de Granada	96			1	5.98479
Blanquillo de Setenil -- Gordal Sevillana	96	0	0.225	0
Blanquillo de Setenil -- Lechín de Granada	96	0	0.243	0
Blanquillo de Setenil -- Negrillo de Arjona	96			1	4.87195
Blanquillo de Setenil -- Racimal de Jaén	96	0	0.321	0	6.65368	x
Blanquillo de Setenil -- Redondilla de Grazalema	96			1	6.23883
Blanquillo fino -- Calatina	94			1	5.33564
Blanquillo fino -- Escarabajillo	93			1	5.00391
Blanquillo fino -- Lechín de Granada	94	0	0.239	0
Blanquillo fino -- Negrillo de la Carlota	94	0	0.307	0	6.17149	x
Blanquillo fino -- Racimal	94			1	7.3682
Blanquillo fino -- Rotondella di Melfi	94	0	0.333	0	10.9323	x
Bodoquera -- Desconocido de Clavijo_3	96			1	4.99575
Bodoquera -- Desconocido de Toledo_2	96			1	4.71508
Bodoquera -- Gordal Sevillana	96	0	0.231	0	8.1695	x
Bodoquera -- Marsaline-1684	96	0	0.282	0
Bodoquera -- Negrillo de Ausejo	95	0	0.253	0	13.3697	x
Bodoquera -- Nocellara del Belice	96	0	0.319	0	12.5701	x
Bodoquera -- Olivo de Alberite	96	0	0.326	0	13.554	x
Bodoquera -- Olivo de Santa Engracia	96			1	5.96567
Bodoquera -- Picudo de Labata	94	0	0.317	0	8.05853	x
Bodoquera -- Redondilla de Logroño	96			1	8.74642
Bodoquera -- Sinop no 6	96			1	5.25324
Bodoquera -- Valanolia	96	0	0.25	0	10.2016	x
Bodoquera -- Verdal de Ribafrecha	96			2	4.73351
Bolvino -- Colomar	95	0	0.321	0	19.259	x
Bolvino -- Gerboui	96			1	9.74389
Bolvino -- Hijarol de Bergasa	96			1	11.3507
Bolvino -- Kallmet	96			1	6.53752
Bolvino -- Kokerrmadh Elbasani	96			2	11.0277
Bolvino -- Macho de Galilea	96	0	0.259	0	16.9991	x
Bolvino -- Majhol-1122	94	0	0.185	0	8.52243	x
Bolvino -- Managjel	96			1	5.62983
Bolvino -- Marantelli	96	0	0.218	0	9.11241	x
Bolvino -- Negral de Bierge	96	0	0.28	0	20.5496	x
Bolvino -- Piñonera	96	0	0.222	0	8.41234	x
Bolvino -- Reixonenca	96			2	8.39303
Bolvino -- Rogeta	96			1	5.29856
Bolvino -- Royal de Calatayud-47	96			2	7.72092
Bolvino -- Royeta de Abizanda	96	0	0.226	0	12.4905	x
Bolvino -- Safrawi	96	0	0.31	0	17.3394	x
Bolvino -- Salonenque	96			1	7.09696
Bolvino -- Sauzen Vert-2218	95			2	5.64817
Bolvino -- Sinop no 1	96			2	5.90843
Bolvino -- Tebabs	96			2	4.66472
Bolvino -- Toffehi Tataouine	96			1	8.50347
Bolvino -- Ulliri i Bardhe i Tiranes	96			2	7.77215
Borriolenca -- Farga	96	0	0.253	0	10.2843	x
Bosana -- Domengues	96	0	0.218	0	11.0925	x
Bosana -- Semidana	96	0	0.222	0	5.62399	x
Bosana -- Toffehi Tataouine	96	0	0.225	0	9.75429	x
Bottone di Gallo -- Desconocido de Ibiza_1	96			2	43.4562
Bottone di Gallo -- Dokkar	96			2	31.1123
Bottone di Gallo -- Jemri Dhokkar-1732	96			2	19.3332
Bottone di Gallo -- Mignolo Cerretano	96			2	13.8388
Bottone di Gallo -- Olivo Gordo de Benisalte	95			2	16.7131
Bottone di Gallo -- Sivigliana da Olio	96			2	13.2418
Bottone di Gallo -- Takesrit	95			1	19.1506
Bottone di Gallo -- VS6	96			2	24.3789
Bouchouika -- Cekiste	95			1	4.76265
Bouchouika -- Cordovil de Serpa	96	0	0.317	0
Bouchouika -- Gordal Sevillana	96	0	0.194	0
Bouchouika -- Lechín de Granada	96	0	0.276	0	6.4127	x
Bouchouika -- Manzanilla Cacereña	96			1	6.50027
Bouchouika -- Picudo de la Axarquía	96			1	7.32422
Bouchouika -- Racimal	96			1	9.18269
Bouchouk Lafayette -- Gerboui	96			1	6.40766
Bouchouk Lafayette -- Gordal Sevillana	96	0	0.211	0
Bouchouk Lafayette -- Bigarude	96	0	0.267	0
Bouchouk Lafayette -- Hendero	96	0	0.286	0
Bouchouk Lafayette -- Ifiri	94			1	4.83113
Bouchouk Lafayette -- Mesyaf_2	95	0	0.217	0	5.84015	x
Bouchouk Lafayette -- Olivo de Clavijo_1	96	0	0.295	0
Bouchouk Lafayette -- Olivo de Ibiza_2	96			2	5.67249
Bouchouk Lafayette -- Pizz'e Carroga	96	0	0.284	0	7.3186	x
Boughenfous -- Mignolo Cerretano	96			1	9.38426
Boughenfous -- Patrón de Cabús	96			2	6.7397
Boughenfous -- VS6	96			2	6.06696
Bouricha -- Ayvalik	96	0	0.215	0
Bouricha -- Chemlal de Kabylie	96			2	4.89312
Bouricha -- Chemlali Ghraiba	95			1	12.0356
Bouricha -- Chemlali Ontha Tataouine	96			2	11.4091
Bouricha -- Chemlali Zarzis	96			1	13.0215
Bouricha -- Cima di Melfi	96			1	7.9143
Bouricha -- Derdi	96	0	0.278	0	8.05552	x
Bouricha -- Desconocido de Alcanadre_1	90	0	0.306	0
Bouricha -- Desconocido de Cortija de la Viana	95			2	6.38205
Bouricha -- Desconocido de Zute	95			2	5.09032
Bouricha -- Dokkar	96			1	15.9967
Bouricha -- El Chatan	96			1	11.1897
Bouricha -- El Kharfi	96			1	11.0204
Bouricha -- Jeddari Chaal	96			1	11.5768
Bouricha -- Klon_14-1812	96			2	7.22645
Bouricha -- Koroneiki	96			2	6.86035
Bouricha -- Leucocarpa	96			2	11.1623
Bouricha -- Lianolia Kerkyras	96			2	8.82376
Bouricha -- Llei del Bessó	96			2	8.81423
Bouricha -- Matolia	95	0	0.296	0	7.38797	x
Bouricha -- Mfartah Blettech	96			1	10.9027
Bouricha -- Morrut de la Faldeta	94	0	0.268	0	8.91552	x
Bouricha -- Neb Tataouine	96			2	7.97911
Bouricha -- Olivastra di Populonia	96			2	7.58321
Bouricha -- Olivastra Seggianese	96			1	9.5336
Bouricha -- Olivo de l'Albera	96			1	12.6769
Bouricha -- Olivo Gordo de Benisalte	95			2	5.86952
Bouricha -- Rossellino	96			1	8.72322
Bouricha -- Rougette de Metidja-2500	96			2	11.1386
Bouricha -- Selvatico	96			1	9.55057
Bouricha -- Semni Djebeniana	96			2	10.5021
Bouricha -- Takesrit	95			1	8.82508
Bouricha -- Ulliri i Bardhe i Tiranes-2499	96			2	9.13837
Bouteillan -- Buyuk Topak Ulak	96			1	4.88629
Bouteillan -- Chalkidikis	96	0	0.241	0	8.1048	x
Bouteillan -- Gordal Sevillana	96	0	0.185	0	8.49991	x
Bouteillan -- Grossanne	96			1	4.79539
Bouteillan -- Limli	96			1	7.61066
Bouteillan -- Marantelli	96			1	9.06546
Bouteillan -- Morisca de Mancor	96			1	6.18447
Bouteillan -- Passulunara	96			2	4.79561
Bouteillan -- Redondilla de Logroño	96	0	0.233	0	6.56988	x
Bouteillan -- Tonda Iblea	96			1	5.3619
Brandofino -- Carolea	95	0	0.309	0	12.3533	x
Brandofino -- Dopia Verias	95			2	8.22846
Brandofino -- Galatistas	95	0	0.272	0	9.17331	x
Brandofino -- Gordal Sevillana	95	0	0.239	0	9.34824	x
Brandofino -- Mesyaf_2	94			1	5.82434
Brandofino -- Samanli	94			1	5.78661
Brava -- Carrasquillo	96			2	4.74302
Brava -- Lechín de Granada	96	0	0.241	0	5.57545	x
Brava -- Royeta de Abizanda	96			1	5.78198
Brava -- Verdala	96			1	5.22488
Buga -- Carolea	96	0	0.296	0	11.5606	x
Buga -- Gordal Sevillana	96	0	0.228	0	8.90852	x
Buga -- Groginja	95			1	6.44503
Buga -- Habichuelero de Baena	96	0	0.262	0	5.47139	x
Buga -- Morchiaio	96	0	0.218	0	6.34863	x
Buga -- Nevado Basto	96	0	0.231	0
Buharica -- Gordal Sevillana	95	0	0.242	0	10.2337	x
Buharica -- Morchiaio	95	0	0.222	0	6.60462	x
Buharica -- Olivo de Alberite	95			1	6.02231
Buidiego -- Gordal Sevillana	96	0	0.22	0	5.53777	x
Buidiego -- Lechín de Granada	96	0	0.221	0
Buidiego -- Manzanilla del Piquito	96			1	6.25163
Buidiego -- Manzanillo Cordobés de Cabra	96			1	5.42953
Buidiego -- Picudo Blanco de Estepa	96			2	5.31735
Buidiego -- Tachuno	95			2	5.39132
Buidiego -- Toruno	96			1	6.80742
Butko -- Cekiste	95			2	7.06272
Butko -- Gordal Sevillana	96			2	4.72362
Buyuk Topak Ulak -- Chalkidikis	96	0	0.318	0	6.83934	x
Buyuk Topak Ulak -- Desconocido de Ausejo	96	0	0.303	0
Buyuk Topak Ulak -- Olivo de Ibiza_2	96			2	7.9064
Buyuk Topak Ulak -- Verdal del Pallars	95	0	0.298	0	5.54273	x
Buža -- Datilero	96	0	0.307	0	5.57952	x
Buža -- Gordal Sevillana	96	0	0.245	0	7.30767	x
Buža -- Morchiaio	96	0	0.243	0	6.81198	x
Buža -- Picholine du Languedoc	96			1	5.17212
Buža -- Royal de Cazorla	96	0	0.278	0
Buža -- Štorta	96			1	9.94835
Caballo -- Callosina	96			1	5.55472
Caballo -- Lechín de Granada	96	0	0.248	0
Caballo -- Pico Limón	96			1	8.1259
Caballo -- Rechino	96	0	0.345	0	8.97141	x
Caballo -- Sevillana de Abla	96			2	4.71858
Cairo_7 -- Chemlali Sfax	95			1	8.15111
Cairo_7 -- Cordovil de Serpa	96	0	0.275	0	10.562	x
Cairo_7 -- Dulzal de Carmona	96			2	4.78187
Cairo_7 -- Hojiblanca	96			1	12.3595
Cairo_7 -- Kosiem	96			2	7.26445
Cairo_7 -- Manzanilla de Agua	96			1	4.80686
Cairo_7 -- Manzanilla de Sevilla	96	0	0.235	0	12.5858	x
Cairo_7 -- Manzanillo Cordobés de Cabra	96			1	5.06465
Cairo_7 -- Pico Limón de Grazalema	96			1	11.2635
Calatina -- Nevado Rizado	96			1	6.49572
Calian -- Gordal Sevillana	95	0	0.211	0	6.26763	x
Calles_1 -- Jeddari Chaal	95	0	0.283	0	9.44069	x
Calles_1 -- Morruda de Segorbe	95	0	0.324	0	13.0258	x
Calles_1 -- Pito	94			1	8.76383
Calles_1 -- Sollana	95	0	0.26	0	8.22285	x
Callosina -- Cobrancosa	96	0	0.325	0	8.66572	x
Callosina -- Lechín de Granada	96	0	0.264	0
Callosina -- Lemeño	96	0	0.296	0	4.86835	x
Callosina -- Manzanilla Cacereña	96	0	0.342	0	8.34781	x
Callosina -- Negro del Carpio	96			1	5.19967
Callosina -- Nevadillo Negro	96			1	7.31061
Callosina -- Olivo de Ibiza_1	96	0	0.274	0	9.37678	x
Callosina -- Picoso	96	0	0.297	0
Callosina -- Rechino	96	0	0.309	0
Canetera -- Farga	96	0	0.266	0	13.6777	x
Canetera -- Ombligón	96			1	5.63794
Caninese -- Chemlali Meliane	96			2	7.24713
Caninese -- Chemlali Sfax	95			2	6.93423
Caninese -- Desconocido de Alcanadre_1	90	0	0.298	0	6.39775	x
Caninese -- El Chatan	96			2	9.84371
Caninese -- Jeddari Chaal	96			2	9.86235
Caninese -- Joanenca	96	0	0.308	0	16.065	x
Caninese -- Lianolia Kerkyras	96			1	16.3357
Caninese -- Liguria	96			1	16.0869
Caninese -- Llei del Bessó	96			2	9.18963
Caninese -- Mfartah Blettech	96			1	14.8688
Caninese -- Neb Djemel	96			2	7.41244
Caninese -- Neb Tataouine	96			2	6.71009
Caninese -- Negret	95	0	0.321	0	13.4387	x
Caninese -- Olivastra Seggianese	96			1	9.26816
Caninese -- Olivo de la Albaida	96			1	5.97802
Caninese -- Souabaa Aljia	96			1	7.22517
Caninese -- Takesrit	95			1	9.49867
Caninese -- Thiaki	96	0	0.316	0	7.3656	x
Caninese -- Toffehi Tataouine	96	0	0.194	0	6.93376	x
Caninese -- Zeitoun Boubezzoula	96			1	16.7876
Cañivano Negro -- Chorreao de Montefrio	96			1	5.08558
Cañivano Negro -- Desconocido de Toledo_1	96			0	10.7817
Cañivano Negro -- Gordal Sevillana	96	0	0.231	0
Cañivano Negro -- Lechín de Granada	96	0	0.281	0
Cañivano Negro -- Ojo de Liebre	96	0	0.35	0	10.61	x
Cañivano Negro -- Picudo Blanco de Estepa	96			1	6.4382
Cañivano Negro -- Real Sevillana	96			0	10.7616
Cañivano Negro-55 -- Gordal Sevillana	96	0	0.19	0
Cañivano Negro-55 -- Lechín de Granada	96	0	0.239	0
Cañivano Negro-55 -- Picudo Blanco de Estepa	96			1	7.68905
Cañivano Negro-55 -- Verdial de Cádiz	96			1	9.1957
Carolea -- Gordal Sevillana	96	0	0.245	0	5.93589	x
Carolea -- Marantelli	96			1	5.84524
Carolea -- Morisca de Mancor	96	0	0.294	0	8.09757	x
Carolea -- Olivo de Lagunilla de Jubera	96			1	5.16561
Carolea -- Samsun Salamuralik	96	0	0.284	0	7.70499	x
Carolea -- Samsun Tuzlamalik	95			1	5.21175
Carolea -- Sauzen Vert-2218	95			1	5.69658
Carolea -- Uovo di Piccione	96			1	6.1247
Carrasco -- Cuquello de la Jana	96	0	0.252	0	10.008	x
Carrasco -- Morruda de Segorbe	95	0	0.288	0	10.4878	x
Carrasqueña de Cañada -- Cobrancosa	96			1	5.1668
Carrasqueña de Cañada -- Corralones de Andújar	96			1	7.30302
Carrasqueña de Cañada -- Desconocido de Barranco Gracia	96			1	7.34715
Carrasqueña de Cañada -- Desconocido de Tramaya	96			1	4.90473
Carrasqueña de Cañada -- Dwarf D	96	0	0.279	0	5.86862	x
Carrasqueña de Cañada -- Gordal Sevillana	96	0	0.248	0
Carrasqueña de Cañada -- Lechín de Granada	96	0	0.254	0
Carrasqueña de Cañada -- Macho de Vilches	96	0	0.324	0	7.73663	x
Carrasqueña Huasco -- Leccino	96	0	0.24	0	7.81378	x
Carrasqueña Huasco -- Macho de Jaén	96			1	5.7266
Carrasqueña Huasco -- Morisca	96	0	0.328	0	7.31978	x
Carrasqueño de Alcaudete -- Gordal Sevillana	96	0	0.229	0
Carrasqueño de Alcaudete -- Lechín de Granada	96	0	0.254	0
Carrasqueño de Alcaudete -- Macho de Vilches	96			1	5.03375
Carrasqueño de Alcaudete -- Pico Limón	96			1	7.42653
Carrasqueño de Alcaudete -- Picudo	96			1	5.17285
Carrasqueño de Alcaudete -- Sevillano de Jumilla	96			1	4.80007
Carrasqueño de Elvas -- Carrasqueño de la Sierra	96			1	4.752
Carrasqueño de Elvas -- Cordovil de Serpa	96			0	6.53242
Carrasqueño de Elvas -- Desconocido del cortijo de Don Pedro	96	0	0.32	0	9.23421	x
Carrasqueño de Elvas -- Escarabajuelo de Posadas	96			1	5.96801
Carrasqueño de Elvas -- Gordal Sevillana	96	0	0.252	0
Carrasqueño de Elvas -- Habichuelero de Baena	96	0	0.333	0
Carrasqueño de Elvas -- Lechín de Granada	96	0	0.274	0
Carrasqueño de Elvas -- Macho de Vilches	96	0	0.325	0	7.16924	x
Carrasqueño de Elvas -- Manzanilla de Montefrío	96			0	10.8159
Carrasqueño de Elvas -- Olivos de El Barranco del Lobo	96			1	5.88538
Carrasqueño de Elvas -- Pico Limón	96			0	9.38518
Carrasqueño de Elvas -- Rechino	96	0	0.333	0
Carrasqueño de Elvas -- Salgar Redondo	96			1	6.43
Carrasqueño de Elvas -- Tempranillo de Lucena	96			1	9.44833
Carrasqueño de Elvas -- Temprano	96			1	5.03632
Carrasqueño de Elvas -- Verdala	96			1	7.12105
Carrasqueño de Elvas -- Verdial de Huévar	96			1	6.77534
Carrasqueño de Jumilla -- Celeiriña	96	0	0.32	0	9.25774	x
Carrasqueño de Jumilla -- Gordal Sevillana	96	0	0.216	0
Carrasqueño de Jumilla -- Lechín de Granada	96	0	0.261	0
Carrasqueño de Jumilla -- Manzanilla de Hellín	96	0	0.331	0	5.77591	x
Carrasqueño de Jumilla -- Olivo Gordo de Jinegros	96			2	6.88055
Carrasqueño de Jumilla -- Royal de Cazorla	96			1	4.73964
Carrasqueño de la Sierra -- Cobrancosa	96			1	5.00002
Carrasqueño de la Sierra -- Cordovil de Serpa	96	0	0.32	0
Carrasqueño de la Sierra -- De Sal	95	0	0.331	0	7.71114	x
Carrasqueño de la Sierra -- Desconocido del cortijo de Don Pedro	96			1	5.96861
Carrasqueño de la Sierra -- Escarabajuelo de Posadas	96			1	4.81242
Carrasqueño de la Sierra -- Gordal Sevillana	96	0	0.238	0
Carrasqueño de la Sierra -- Lechín de Granada	96	0	0.271	0	5.06173	x
Carrasqueño de la Sierra -- Machorrón	96			2	4.89657
Carrasqueño de la Sierra -- Manzanilla del Piquito	96			1	8.09563
Carrasqueño de la Sierra -- Mollar de Cieza	96	0	0.297	0	6.12975	x
Carrasqueño de la Sierra -- Pavo	96			1	7.05573
Carrasqueño de la Sierra -- Rara de Cabra	96			0	13.3272
Carrasqueño de Porcuna -- Lechín de Granada	96	0	0.248	0	5.7425	x
Carrasqueño de Porcuna -- Negro del Carpio	96			1	6.42839
Carrasqueño de Porcuna -- Nevadillo Negro-2282	96	0	0.214	0	8.462	x
Carrasqueta de Ayora -- Desconocida de Fuente Santa	96			2	5.35519
Carrasqueta de Ayora -- Gordilla de Cabo de Gata	95	0	0.305	0	8.5923	x
Carrasqueta de Ayora -- Lechín de Granada	96	0	0.215	0
Carrasquillo -- Gordal Sevillana	96	0	0.194	0
Carrasquillo -- Lechín de Granada	96	0	0.276	0	7.67454	x
Carrasquillo -- Negrillo de la Carlota	96			1	8.81042
Carrasquillo -- Picual	96			1	5.5849
Carrasquillo -- Rara de Cabra	96			1	10.0144
Carrasquillo -- Torcío	96	0	0.328	0	10.2064	x
Carrasquillo -- Vidrillo	95	0	0.33	0	9.05091	x
Carrelluda -- Claramunt	96	0	0.298	0	17.733	x
Carrelluda -- Colomar	95	0	0.241	0	13.2766	x
Carrelluda -- Fontllonga	96	0	0.284	0	13.03	x
Carrelluda -- Grossal de Bovera	95			2	9.31951
Carrelluda -- Kokerrmadh Elbasani	96			2	4.68048
Carrelluda -- Manzanella del Mezquin	95			1	10.6223
Carrelluda -- Olivera d'Aransis	96			1	13.1982
Carrelluda -- Rogeta	96			1	11.5266
Carrelluda -- Safrawi	96			1	9.46826
Carrelluda -- Sarrut	96			1	11.4394
Carrelluda -- Verdal de Barcedana	96			2	7.17798
Carrelluda -- Verdal del Pallars	95	0	0.297	0	12.8933	x
Casas -- Grossanne	96	0	0.229	0	5.35416	x
Caspolina -- Desconocido de Arnedo	96			1	7.84069
Caspolina -- Empeltre	96	0	0.302	0	13.881	x
Castellana -- Gordal Sevillana	96	0	0.21	0
Castellana -- Lechín de Granada	96	0	0.257	0	5.29502	x
Castellana -- Ojo de Liebre	96			1	5.22236
Castellana -- Pavo	96	0	0.352	0	14.387	x
Castellana -- Tachuno	95			1	4.96664
Castellana -- Verdial de Alcalá la Real	95	0	0.33	0	7.18287	x
Castriciana Rapparina -- Manzanilla Aceitera	96	0	0.255	0	14.9938	x
Cavalieri -- Crastu	94			1	9.16586
Cavalieri -- Passulunara	95	0	0.218	0	8.99393	x
Cayet Noir -- Gordal Sevillana	96			1	7.33228
Cayet Noir -- Semidana	96			1	8.22653
Cekiste -- Marsaline-1684	95	0	0.295	0
Cekiste -- Roalejo de Arnedo	95			1	5.02752
Cekiste -- Samsun Salamuralik	95	0	0.299	0	9.59858	x
Cekiste -- Tonda Iblea	95			1	4.90847
Celebi (Iznik) -- Safrawi	96	0	0.271	0	10.1528	x
Celebi (Iznik) -- Salonenque	96			1	4.688
Celebi (Iznik) -- Sam (Iznik)	94			1	8.19601
Celeiriña -- De Sal	95			1	5.38183
Celeiriña -- Gordal Sevillana	96	0	0.183	0
Celeiriña -- Lechín de Granada	96	0	0.226	0
Celeiriña -- Madural de Mallorca	95			1	4.72452
Celeiriña -- Manzanilla de Alfarnatejo	95			1	7.88715
Cerezuela -- Rotondella di Melfi	96			1	5.55593
Cerruda de Liesa -- Desconocido de Clavijo_4	95	0	0.337	0	8.93949	x
Cerruda de Liesa -- Desconocido de Sojuela_1	95	0	0.313	0	9.83287	x
Cerruda de Liesa -- Desconocido de Toledo_2	95	0	0.295	0	6.00145	x
Cerruda de Liesa -- Desconocido de Villamediana_1	95			1	8.44778
Cerruda de Liesa -- Gordal Sevillana	95	0	0.26	0	8.23287	x
Cerruda de Liesa -- Habichuelero de Baena	95	0	0.288	0
Cerruda de Liesa -- Merhavia	95			1	6.5244
Cerruda de Liesa -- Meskyet Dawla Gafsa	95	0	0.209	0	8.1679	x
Cerruda de Liesa -- Olivo de Alberite	95			1	6.54671
Cerruda de Liesa -- Olivo de Clavijo_2	95			1	5.89589
Cerruda de Liesa -- Olivo de Leza	95			1	5.17036
Cerruda de Liesa -- Olivo de Ribafrecha-2512	95			1	5.93583
Cerruda de Liesa -- Picudo de Labata	93	0	0.311	0	6.32436	x
Cerruda de Liesa -- Samsun Salamuralik	95			1	4.90254
Cerruda de Liesa -- Toffehi Tataouine	95	0	0.207	0
Cerruda de Liesa -- Verdal de Ribafrecha	95			1	4.75739
Cerruda de Olvena -- Desconocido de Alberite	96	0	0.284	0	8.65639	x
Cerruda de Olvena -- Desconocido de Ausejo	96	0	0.333	0	8.1084	x
Cerruda de Olvena -- Desconocido de Sojuela_1	96	0	0.297	0	6.61372	x
Cerruda de Olvena -- Gordal Sevillana	96	0	0.247	0	6.6057	x
Cerruda de Olvena -- Hendero	96			1	5.7513
Cerruda de Olvena -- Itrana	96	0	0.306	0	4.77277	x
Cerruda de Olvena -- Negral de Préjano	96			0	14.0485
Cerruda de Olvena -- Ocal Cordobesa	96			2	5.03819
Cerruda de Olvena -- Olivo de Murillo de Río Leza	96	0	0.348	0	7.95498	x
Cerruda de Olvena -- Picudo de Labata	94	0	0.33	0	6.05634	x
Cerruda de Olvena -- Roalejo de Arnedo	96			2	4.72772
Cerruda de Olvena -- Sacakli otur	95			1	6.65265
Cerruda de Olvena -- Samsun Salamuralik	96	0	0.277	0	5.48954	x
Cerruda de Olvena -- Toffehi Tataouine	96	0	0.204	0
Chalkidikis -- Escarabajuelo de Posadas	96	0	0.282	0
Chalkidikis -- Gerboui	96			1	5.17997
Chalkidikis -- Nevadillo Negro	96	0	0.276	0	5.10711	x
Chalkidikis -- Olivo de Clavijo_1	96	0	0.278	0
Chalkidikis -- Sarrut	96			2	4.69246
Changlot Real -- Genovesa	96	0	0.266	0	5.65172	x
Changlot Real -- Lechín de Granada	96	0	0.273	0	9.92799	x
Chemlal de Kabylie -- Cima di Melfi	96			1	7.46354
Chemlal de Kabylie -- Coratina	96			1	7.59802
Chemlal de Kabylie -- Derdi	96			1	7.15676
Chemlal de Kabylie -- Desconocido de Alcanadre-2505	95			2	7.10872
Chemlal de Kabylie -- Desconocido de Ibiza_3	95	0	0.22	0	15.9093	x
Chemlal de Kabylie -- Dokkar	96			2	9.57032
Chemlal de Kabylie -- Ifiri	94	0	0.292	0	16.462	x
Chemlal de Kabylie -- Menya	96	0	0.274	0	5.62671	x
Chemlal de Kabylie -- Mrčakinja	96			2	6.19946
Chemlal de Kabylie -- Neb Tataouine	96	0	0.295	0	12.064	x
Chemlal de Kabylie -- Olivo di Mandanici	96	0	0.316	0	9.64167	x
Chemlal de Kabylie -- Picudo de Labata	94	0	0.252	0
Chemlal de Kabylie -- Souidi	96			1	6.00861
Chemlal de Kabylie -- Takesrit	95	0	0.307	0	10.7597	x
Chemlal de Kabylie -- Ulliri i Bardhe i Tiranes-2499	96			1	6.50051
Chemlali Balhi -- Chemlali Sfax	95			1	16.5161
Chemlali Balhi -- El Chatan	96			2	9.70052
Chemlali Balhi -- El Kharfi	96			2	5.32412
Chemlali Balhi -- Jeddari Chaal	96			2	11.4926
Chemlali Balhi -- Lianolia Kerkyras	96			2	13.4727
Chemlali Balhi -- Rougette de Metidja-2500	96			2	9.51202
Chemlali Ghraiba -- Chemlali Sfax	94	0	0.316	0	19.6795	x
Chemlali Ghraiba -- El Chatan	95			1	15.1022
Chemlali Ghraiba -- Jeddari Chaal	95			2	10.3902
Chemlali Ghraiba -- Jemri Dhokkar-1732	95			1	13.8296
Chemlali Ghraiba -- Mfartah Blettech	95			2	9.50297
Chemlali Ghraiba -- Neb Tataouine	95	0	0.24	0	14.7966	x
Chemlali Ghraiba -- Olivastra di Populonia	95			2	9.76755
Chemlali Meliane -- Chemlali Sfax	95	0	0.28	0	16.4648	x
Chemlali Meliane -- Chemlali Zarzis	96	0	0.301	0	19.6755	x
Chemlali Meliane -- El Chatan	96	0	0.253	0	17.0411	x
Chemlali Meliane -- El Kharfi	96			1	12.765
Chemlali Meliane -- Jeddari Chaal	96			2	6.58656
Chemlali Meliane -- Jemri Dhokkar-1732	96	0	0.233	0	16.5739	x
Chemlali Meliane -- Jemri Dhokkar-1907	96			2	5.85367
Chemlali Meliane -- Mfartah Blettech	96			1	10.6341
Chemlali Meliane -- Neb Djemel	96	0	0.242	0	14.9427	x
Chemlali Meliane -- Negret	95			2	5.99647
Chemlali Meliane -- Olivastra Seggianese	96			2	7.18342
Chemlali Meliane -- Souidi	96			1	9.18496
Chemlali Meliane -- Zeitoun Boubezzoula	96			2	10.5157
Chemlali Ontha Tataouine -- Chemlali Sfax	95			0	22.161
Chemlali Ontha Tataouine -- Chemlali Zarzis	96			0	24.3279
Chemlali Ontha Tataouine -- El Chatan	96			2	10.8009
Chemlali Ontha Tataouine -- Jeddari Chaal	96			2	12.7062
Chemlali Ontha Tataouine -- Jemri Dhokkar-1732	96			2	11.7044
Chemlali Ontha Tataouine -- Mfartah Blettech	96			2	12.6283
Chemlali Ontha Tataouine -- Neb Djemel	96			1	14.7698
Chemlali Ontha Tataouine -- Negret	95			1	12.8708
Chemlali Ontha Tataouine -- Souidi	96			1	14.2111
Chemlali Ontha Tataouine -- Takesrit	95			1	9.13028
Chemlali Ouled Msallem -- Chemlali Sfax	95	0	0.327	0	13.0996	x
Chemlali Ouled Msallem -- Lucio	96			1	5.4326
Chemlali Ouled Msallem -- Negrilla de Cortijo Fraile	95			1	6.69442
Chemlali Ouled Msallem -- Olivo de Sortes	95			2	6.20524
Chemlali Sfax -- Ayvalik	95	0	0.217	0
Chemlali Sfax -- D. de Egipto	95	0	0.304	0	10.0836	x
Chemlali Sfax -- Desconocido de Zute	94			2	5.88704
Chemlali Sfax -- Dolce	94	0	0.304	0	7.30828	x
Chemlali Sfax -- El Chatan	95			1	12.6854
Chemlali Sfax -- El Salam	95	0	0.287	0	6.58778	x
Chemlali Sfax -- Injassi Hchichina	95			1	19.536
Chemlali Sfax -- Jeddari Chaal	95			1	15.4259
Chemlali Sfax -- Joanenca	95			1	8.18355
Chemlali Sfax -- Kosiem	95			1	5.15291
Chemlali Sfax -- Lianolia Kerkyras	95			2	9.54562
Chemlali Sfax -- Llei del Bessó	95			2	6.05722
Chemlali Sfax -- Mfartah Blettech	95			1	11.4568
Chemlali Sfax -- Mlouki Blettech	95	0	0.268	0	13.1136	x
Chemlali Sfax -- Neb Djemel	95			1	12.1689
Chemlali Sfax -- Neb Tataouine	95			2	5.03076
Chemlali Sfax -- Negret	95	0	0.354	0	14.4911	x
Chemlali Sfax -- Pidicuddara	95	0	0.265	0	8.51751	x
Chemlali Sfax -- R'Khami	95	0	0.306	0	12.8591	x
Chemlali Sfax -- Rougette de Pignan	94			1	6.28821
Chemlali Sfax -- Sennara	93	0	0.259	0	6.16125	x
Chemlali Sfax -- Sinawy	95	0	0.272	0	8.29188	x
Chemlali Sfax -- Souidi	95			2	9.13369
Chemlali Sfax -- Toffehi Tataouine	95	0	0.232	0	4.85203	x
Chemlali Sfax -- Unknown OT2	95			1	9.17409
Chemlali Sfax -- Wardan	95	0	0.24	0	8.66534	x
Chemlali Sfax -- Zarbout Louzir	95			2	12.5619
Chemlali Sig -- Chemlali Zarzis	96			1	4.81493
Chemlali Sig -- Desconocido de Ibiza_3	95			2	6.9567
Chemlali Sig -- Desconocido de Zute	95			1	4.87398
Chemlali Sig -- Dolce Agogia	96	0	0.331	0	5.30753	x
Chemlali Sig -- Hemblasi	96			1	6.23312
Chemlali Sig -- Jemri Bouchouka	96	0	0.248	0
Chemlali Sig -- Martina	87	0	0.259	0
Chemlali Sig -- Menya	96			0	8.64522
Chemlali Sig -- Mignolo Cerretano	96			0	10.1992
Chemlali Sig -- Mrčakinja	96			1	9.13808
Chemlali Sig -- Safrawi	96	0	0.229	0
Chemlali Sig -- Sollana	96	0	0.283	0
Chemlali Sig -- Ulliri i Bardhe i Tiranes-2499	96			0	15.907
Chemlali Sig -- Verdal d'Algars	96	0	0.246	0
Chemlali Zarzis -- Desconocido de El Patriarca_5	95			2	6.9397
Chemlali Zarzis -- Dokkar	96	0	0.309	0	26.1012	x
Chemlali Zarzis -- Dolce Agogia	96			1	6.4299
Chemlali Zarzis -- El Chatan	96			1	13.2558
Chemlali Zarzis -- El Kharfi	96			1	10.9189
Chemlali Zarzis -- Frantoio	96			1	12.8133
Chemlali Zarzis -- Gremignolo di Bolgheri	96	0	0.283	0	6.46711	x
Chemlali Zarzis -- Jemri Dhokkar-1732	96	0	0.351	0	18.0421	x
Chemlali Zarzis -- Jemri Dhokkar-1907	96	0	0.308	0	13.0168	x
Chemlali Zarzis -- Joanenca	96			1	6.33241
Chemlali Zarzis -- Llei del Bessó	96			2	6.93241
Chemlali Zarzis -- Mignolo Cerretano	96	0	0.35	0	13.3	x
Chemlali Zarzis -- Neb Djemel	96			1	10.0258
Chemlali Zarzis -- Negret	95			2	6.02435
Chemlali Zarzis -- Ogliarola del Vulture	96			1	5.07779
Chemlali Zarzis -- Olivastra Seggianese	96			1	9.48083
Chemlali Zarzis -- Olivo di Mandanici	96			1	7.18294
Chemlali Zarzis -- Rossellino	96			1	7.76937
Chemlali Zarzis -- Rougette de Pignan	94			1	5.43627
Chemlali Zarzis -- Selvatico	96			2	8.46772
Chemlali Zarzis -- Souidi	96			2	4.7244
Chemlali Zarzis -- Takesrit	95	0	0.345	0	11.6205	x
Chemlali Zarzis -- Toffehi Tataouine	96	0	0.222	0	6.21609	x
Chemlali Zarzis -- Ulliri i Bardhe i Tiranes-2499	96			0	18.6927
Chemlali Zarzis -- Zeitoun Boubezzoula	96			2	8.02264
Chemlali Zarzis -- Zuzorka	96			1	6.73427
Chiquitita -- Picual	96	0	0.282	0	11.1504	x
Chiquitita -- Selection-5	95	0	0.274	0	14.9463	x
Chiquitita -- Selection-8	90	0	0.187	0	14.671	x
Chondrolia -- Kalinjot	96	0	0.29	0	12.0605	x
Chondrolia -- Klon_14-1812	96			1	7.58851
Chondrolia -- Kokerrmadh Elbasani	96	0	0.247	0	11.9592	x
Chondrolia -- Thiaki	96	0	0.252	0
Chondrolia -- Ulliri i Kuq	95			1	6.08028
Chorreao de Montefrio -- Gordal Sevillana	96	0	0.23	0	6.22915	x
Chorrúo -- De Sal	95			0	10.6994
Chorrúo -- Desconocido de Toledo_2	96			1	5.3862
Chorrúo -- Gordal Sevillana	96	0	0.236	0
Chorrúo -- Lechín de Granada	96	0	0.269	0
Chorrúo -- Megaron	96	0	0.306	0	5.59517	x
Chorrúo -- Racimal	96			1	5.01196
Chorrúo -- Royal de Cazorla	96			1	5.11624
Chorrúo -- Varudo	96	0	0.347	0	8.11263	x
Chorrúo de Castro del Río -- Corralones de Andújar	96			1	6.63648
Chorrúo de Castro del Río -- Desconocido de Toledo_2	96	0	0.315	0	7.2396	x
Chorrúo de Castro del Río -- Gordal Sevillana	96	0	0.222	0	5.15651	x
Chorrúo de Castro del Río -- Lechín de Granada	96	0	0.241	0
Chorrúo de Castro del Río -- Manzanillo Cordobés de Cabra	96			1	5.75429
Chorrúo de Castro del Río -- Morona	96	0	0.327	0	9.40297	x
Chorrúo de Castro del Río -- Nevadillo Negro	96	0	0.321	0	9.98723	x
Chorrúo de Castro del Río -- Olivo de Alberite	96	0	0.31	0	9.8305	x
Chorrúo de Castro del Río -- Pico Limón	96			1	8.05318
Chorrúo de Castro del Río -- Sevillano de Jumilla	96			1	7.35003
Chorrúo de Castro del Río -- Verdial de Alcaudete	94			2	5.91646
Cima di Melfi -- Coratina	96			2	7.07965
Cima di Melfi -- Frantoio	96	0	0.295	0	15.3899	x
Cima di Melfi -- Jemri Dhokkar-1732	96			2	5.37251
Cima di Melfi -- Klon_14-1812	96			1	10.2638
Cima di Melfi -- Semni Djebeniana	96			2	4.75155
Cipresino -- Santa Martinenga	96	0	0.305	0	12.827	x
Cirujal de Préjano -- Desconocido de Clavijo_3	96	0	0.309	0
Cirujal de Préjano -- Gordal Sevillana	96	0	0.228	0
Cirujal de Préjano -- Kalamon	96	0	0.306	0	5.8243	x
Cirujal de Préjano -- Mançanal d'Arnes	95			1	4.78428
Cirujal de Préjano -- Memecik	96	0	0.282	0	5.2173	x
Cirujal de Préjano -- Olivo de Clavijo_1	96			1	5.58357
Cirujal de Préjano -- Olivo de Santa Engracia	96	0	0.278	0
Cirujal de Préjano -- Picudo de Labata	94			1	5.78588
Cirujal de Préjano -- Royal	96	0	0.327	0	6.82672	x
Cirujal de Préjano -- Samsun Salamuralik	96	0	0.295	0	5.98706	x
Claramunt -- Ayvalik	96			2	9.08323
Claramunt -- Domengues	96			1	16.693
Claramunt -- Fontllonga	96	0	0.263	0	10.2248	x
Claramunt -- Fram	96			1	17.4111
Claramunt -- Manzanella del Mezquin	95			2	11.6517
Claramunt -- Moixonenca de Rafels	95			2	13.7311
Claramunt -- Olivera d'Aransis	96	0	0.221	0	15.8571	x
Claramunt -- Reixonenca	96			2	10.2746
Claramunt -- Rogeta	96	0	0.278	0	12.7049	x
Claramunt -- Roieta	96	0	0.307	0	15.8786	x
Claramunt -- Royal de Calatayud-47	96			1	13.7079
Claramunt -- Royal de Sabiñán	96			1	14.7679
Claramunt -- Safrawi	96	0	0.292	0	14.7126	x
Claramunt -- Sarrut	96	0	0.183	0	10.3324	x
Claramunt -- Toffehi Tataouine	96	0	0.298	0	17.2259	x
Claramunt -- Tounsi Gafsa	96	0	0.2	0	12.2156	x
Claramunt -- Ulliri i Bardhe i Tiranes	96			1	12.09
Claramunt -- Vera	96			1	4.976
Claramunt -- Verdal de Barcedana	96	0	0.241	0	16.8892	x
Claramunt -- Verdal de Figols	96			1	14.2996
Clota -- Empeltre	93	0	0.262	0
Cobrancosa -- De Sal	95			1	6.60688
Cobrancosa -- Desconocido de Santa Fe	96			1	7.47673
Cobrancosa -- Desconocido del cortijo de Don Pedro	96			1	6.9823
Cobrancosa -- Gordal Sevillana	96	0	0.204	0
Cobrancosa -- Lechín de Granada	96	0	0.216	0
Cobrancosa -- Negro del Carpio	96			1	4.87376
Colomar -- Majhol-1122	94			1	5.09975
Colomar -- Negral de Bierge	95			2	6.52524
Colomar -- Roieta	95	0	0.23	0	9.69574	x
Colomar -- Safrawi	95			1	7.90629
Colomar -- Verdal del Pallars	95	0	0.267	0	10.5952	x
Coratina -- Frantoio	96	0	0.243	0	11.702	x
Coratina -- Leccino	96			2	5.15065
Coratina -- Levantinka	96			1	11.4635
Coratina -- Menya	96	0	0.276	0	4.79552	x
Coratina -- Nociara	96			1	6.78618
Coratina -- Stara Maslina-2005	96			1	5.20738
Corbella -- Farga	96	0	0.26	0
Corbella -- Habichuelero de Baena	96	0	0.248	0
Corbella -- Olivastra Seggianese	96			1	4.84677
Corberana -- Verdal de Manresa	95	0	0.286	0	10.6681	x
Cordobés de Cornago -- Desconocido de Ausejo	96	0	0.35	0	11.4273	x
Cordobés de Cornago -- Desconocido de Clavijo_4	96			1	5.47472
Cordobés de Cornago -- Grossanne	96			1	6.96085
Cordobés de Cornago -- Morisca de Mancor	96			1	7.92565
Cordobés de Cornago -- Olivastra Seggianese	96	0	0.246	0
Cordobés de Cornago -- Olivo de Alberite	96			1	6.40212
Cordobés de Cornago -- Olivo de Lagunilla de Jubera	96			2	5.47862
Cordobés de Cornago -- Rañinera	96			1	10.0486
Cordobés de Cornago -- Royal	96			2	5.14508
Cordobés de Cornago -- Toffehi Tataouine	96	0	0.253	0	10.071	x
Cordobés de Cornago -- Verdale de l'Hérault	96			1	4.85877
Cordovil de Serpa -- Manzanilla Cacereña	96			1	4.83955
Cordovil de Serpa -- Manzanilla de Agua	96			0	7.34259
Cordovil de Serpa -- Manzanilla de Almería	96	0	0.35	0	8.19038	x
Cordovil de Serpa -- Manzanilla de Montefrío	96			0	10.1306
Cordovil de Serpa -- Manzanilla del Piquito	96			1	5.29336
Cordovil de Serpa -- Manzanilla Prieta	96	0	0.331	0
Cordovil de Serpa -- Morisca	96	0	0.352	0
Cordovil de Serpa -- Morona	96			0	9.64275
Cordovil de Serpa -- Nevadillo Negro	96	0	0.336	0	7.58117	x
Cordovil de Serpa -- Olivo de Mallorca_1	96	0	0.349	0	9.01995	x
Cordovil de Serpa -- Olivos de El Barranco del Lobo	96			1	8.60787
Cordovil de Serpa -- Pajarera	96			1	6.75726
Cordovil de Serpa -- Pajarero	96			1	5.87228
Cordovil de Serpa -- Pico Limón	96			1	6.83216
Cordovil de Serpa -- Pico Limón de Grazalema	96	0	0.345	0	10.9129	x
Cordovil de Serpa -- Picudo	96			0	6.14984
Cordovil de Serpa -- Picudo de la Axarquía	96	0	0.345	0	9.98236	x
Cordovil de Serpa -- Racimal	96	0	0.328	0	8.54902	x
Cordovil de Serpa -- Rechino	96			0	8.39302
Cordovil de Serpa -- Redondilla de Grazalema	96	0	0.341	0
Cordovil de Serpa -- Sevillano de Jumilla	96	0	0.344	0	7.45875	x
Cordovil de Serpa -- Tachuno	95			1	5.63266
Cordovil de Serpa -- Tempranillo de Lucena	96	0	0.286	0
Cordovil de Serpa -- Torcío	96	0	0.32	0
Cordovil de Serpa -- Verde Verdelho	96	0	0.277	0
Cordovil de Serpa -- Verdial de Alcalá la Real	95			0	7.38224
Cordovil de Serpa -- Verdial de Alcaudete	94	0	0.321	0	6.99265	x
Cordovil de Serpa -- Verdial de Huévar	96	0	0.32	0
Cordovil de Serpa -- Vidrillo	95	0	0.314	0
Cordovil de Serpa -- Zorzaleño de Setenil	96			0	6.61209
Cornezuelo de Jaén -- Genovesa	96	0	0.321	0	8.17389	x
Cornezuelo de Jaén -- Gordal Sevillana	96	0	0.247	0	7.34903	x
Cornezuelo de Jaén -- Memecik	96			1	5.5672
Cornezuelo de Jaén -- Sepoka	96	0	0.282	0	8.59965	x
Cornezuelo de Jaén -- Verdial de Vélez-Málaga-51	96	0	0.295	0	14.4599	x
Cornicabra -- Desconocido de Sojuela_2	94	0	0.301	0	13.2764	x
Cornicabra -- Gordal Sevillana	96	0	0.235	0	5.02621	x
Cornicabra -- Lechín de Granada	96	0	0.234	0
Cornicabra -- Marsaline-1684	96	0	0.282	0
Cornicabra -- Ojo de Liebre	96			1	8.22838
Cornicabra -- Tachuno	95			1	7.70495
Cornicabra de Jerez Caballeros -- Desconocido del cortijo de Don Pedro	96			1	6.71487
Cornicabra de Jerez Caballeros -- Genovesa	96	0	0.263	0
Cornicabra de Jerez Caballeros -- Gordal Sevillana	96	0	0.217	0
Cornicabra de Jerez Caballeros -- Imperial de Jaén	96			1	5.53056
Cornicabra de Jerez Caballeros -- Lechín de Granada	96	0	0.261	0	4.82216	x
Cornicabra de Jerez Caballeros -- Lucio	96			1	6.18922
Cornicabra de Jerez Caballeros -- Pico Limón	96			2	5.38577
Cornicabra de Mérida -- Galega Vulgar	96	0	0.266	0	17.3638	x
Cornicabra de Mérida -- Verdial de Badajoz	96	0	0.298	0	16.1682	x
Corralones de Andújar -- Dwarf D	96	0	0.276	0	9.45899	x
Corralones de Andújar -- Gordal de Vélez Rubio	96	0	0.268	0
Corralones de Andújar -- Gordal Sevillana	96	0	0.192	0
Corralones de Andújar -- Lechín de Granada	96	0	0.241	0
Corralones de Andújar -- Morisca	96			1	7.60307
Crastu -- Passulunara	95	0	0.209	0	7.47097	x
Crnica -- Frantoio	96	0	0.286	0	14.6705	x
Crnica -- Mignolo	96			1	4.71752
Crnica -- Ornellaia	96			2	7.6965
Crnica -- Štorta	96	0	0.291	0	18.3141	x
Cucca -- Frantoio	96	0	0.267	0	12.4503	x
Cucca -- Grappolo	96			1	5.21006
Cucca -- Leccino	96			1	10.2157
Cucca -- Mignolo	96			1	8.26069
Cucca -- Olivo di San Lorenzo	96			1	13.1468
Cuoricino -- Ayvalik	96	0	0.281	0	11.7431	x
Cuoricino -- Domengues	96			2	4.68626
Cuoricino -- Kothreiki	96			2	8.19644
Cuoricino -- Rowghani	96			2	4.91216
Cuoricino -- Royal de Sabiñán	96	0	0.236	0	12.3917	x
Cuoricino -- Safrawi	96	0	0.287	0	13.9748	x
Cuquello de la Jana -- Farga	96	0	0.286	0	10.8891	x
Cuquello de la Jana -- Manzanilla Cacereña	96	0	0.29	0	9.69835	x
Cuquello_1 -- Desconocido de Alcanadre_1	90	0	0.327	0	9.45427	x
Curivell -- Desconocido de Ibiza_3	94			2	6.21774
Curivell -- Vaddarica	95			1	7.42809
D. de Egipto -- Dolce	95			1	5.67727
Dahgan -- Labeed	93	0	0.262	0	21.1968	x
Datilera de Caudiel -- Manzanilla Aceitera	96			1	6.96725
Datilera de Caudiel -- Manzanilla de Caudiel	95	0	0.274	0	14.9564	x
Datilera de Caudiel -- Morruda de Segorbe	95	0	0.315	0	14.7813	x
Datilero -- Gordal de Granada	96	0	0.32	0
Datilero -- Gordal Sevillana	96	0	0.269	0
Datilero -- Hendero	96	0	0.305	0
Datilero -- Lechín de Granada	96	0	0.273	0
Datilero -- Olivos de Cotillas	96	0	0.275	0	6.15715	x
Datilero -- Picudo	96			0	5.67074
Datilero -- Redondilla de Grazalema	96	0	0.344	0	5.76926	x
Datilero -- Royal de Cazorla	96	0	0.352	0
Datilero -- Verdala	96	0	0.352	0	7.64372	x
Datilero -- Verdial de Badajoz	96			0	9.68761
De Sal -- Desconocida-1481	95	0	0.34	0	9.913	x
De Sal -- Desconocido de Barranco Gracia	95			1	4.66492
De Sal -- Gordal Sevillana	95	0	0.24	0
De Sal -- Hendero	95	0	0.307	0
De Sal -- Lechín de Granada	95	0	0.28	0
De Sal -- Macho de Vilches	95			1	5.44035
De Sal -- Manzanilla Cacereña	95			1	5.04798
De Sal -- Manzanilla de Alfarnatejo	94	0	0.31	0	5.21696	x
De Sal -- Manzanilla del Piquito	95			1	5.23122
De Sal -- Megaron	95	0	0.3	0
De Sal -- Ocal Cordobesa	95	0	0.296	0
De Sal -- Rechino	95			0	7.05268
De Sal -- Varudo	95	0	0.328	0	5.60599	x
Delle -- Janude_1	95			2	13.6042
Delle -- Majhol-1122	94			1	8.85955
Delle -- Yag Celebi (Tatayn)	95			2	5.77672
Delle -- Zaity	95	0	0.179	0	17.9319	x
Derdi -- Gordal Sevillana	96	0	0.233	0	5.60326	x
Derdi -- Manzanilla de Hellín	96	0	0.303	0	4.93413	x
Desconocida de Fuente Santa -- Desconocido de Santa Fe	96			2	5.63975
Desconocida de Fuente Santa -- Macho de Jaén	96			1	7.04231
Desconocida de Fuente Santa -- Madural de Mallorca	95			1	6.00652
Desconocida de Fuente Santa -- Manzanilla Cacereña	96			2	6.51326
Desconocida de Fuente Santa -- Mollar de Cieza	96			2	5.16111
Desconocida de Fuente Santa -- Morrut-607	96			2	7.91334
Desconocida de Fuente Santa -- Negro del Carpio	96			2	5.49582
Desconocida de Fuente Santa -- Olivo de Mallorca_1	96			1	4.94618
Desconocida de Fuente Santa -- Picual	96	0	0.271	0	15.7536	x
Desconocida de Fuente Santa -- Rara de Cabra	96			1	6.49786
Desconocida de Fuente Santa -- Verdial de Alcalá la Real	95			1	6.99459
Desconocida-1481 -- Gordal Sevillana	96	0	0.223	0	8.41026	x
Desconocida-1481 -- Habichuelero de Baena	96			1	5.36594
Desconocida-1481 -- Lechín de Granada	96	0	0.196	0
Desconocida-1481 -- Morrut-607	96			1	7.91921
Desconocida-1481 -- Nevadillo Negro	96			1	7.31284
Desconocida-1481 -- Ocal	96			2	4.70901
Desconocida-1481 -- Salgar Redondo	96			1	5.42026
Desconocido de Alberite -- Dopia Verias	96			1	5.14903
Desconocido de Alberite -- Gordal Sevillana	96	0	0.233	0	8.47029	x
Desconocido de Alberite -- Memecik	96			1	6.40691
Desconocido de Alberite -- Olivo de Villamediana	96			1	6.42869
Desconocido de Alberite -- Picudillo	96			1	5.45759
Desconocido de Alberite -- Roalejo de Arnedo	96			1	7.23416
Desconocido de Alcanadre_1 -- Desconocido de Alcanadre-2505	89			1	6.0041
Desconocido de Alcanadre_1 -- Desconocido de El Patriarca_5	89	0	0.339	0	8.16193	x
Desconocido de Alcanadre_1 -- Desconocido de El Patriarca_6	88	0	0.325	0	7.56865	x
Desconocido de Alcanadre_1 -- Dokkar	90			1	6.86653
Desconocido de Alcanadre_1 -- Mavreya	90	0	0.272	0	4.8699	x
Desconocido de Alcanadre_1 -- Olivo de Clavijo_1	90	0	0.289	0
Desconocido de Alcanadre_1 -- Picudo de Labata	92	0	0.314	0
Desconocido de Alcanadre_1 -- Sevillenca	90	0	0.248	0
Desconocido de Alcanadre_1 -- Verdial de Alcalá la Real	91	0	0.311	0
Desconocido de Alcanadre-2505 -- Galega Vulgar	95			1	12.423
Desconocido de Alcanadre-2505 -- Olivo de la Albaida	95			2	5.28826
Desconocido de Alcanadre-2505 -- Olivo de l'Albera	95			1	10.2033
Desconocido de Alcanadre-2505 -- Sevillenca	95	0	0.235	0	13.6248	x
Desconocido de Alcanadre-2505 -- Sivigliana da Olio	95			1	11.2353
Desconocido de Alcanadre-2507 -- Empeltre	96	0	0.277	0	9.91703	x
Desconocido de Arnedo -- Desconocido de Clavijo_3	96	0	0.253	0	4.73176	x
Desconocido de Arnedo -- Empeltre	96	0	0.31	0	11.2523	x
Desconocido de Arnedo -- Hendero	96	0	0.23	0
Desconocido de Arnedo -- Marsaline-1684	96	0	0.275	0
Desconocido de Arnedo -- Redondilla de Logroño	96	0	0.253	0	5.31207	x
Desconocido de Ausejo -- Desconocido de Clavijo_4	96	0	0.321	0	6.41625	x
Desconocido de Ausejo -- Desconocido de Sojuela_1	96	0	0.308	0	7.26175	x
Desconocido de Ausejo -- Bigarude	96			1	5.64263
Desconocido de Ausejo -- Itrana	96			1	5.25691
Desconocido de Ausejo -- Nación	95			1	5.56875
Desconocido de Ausejo -- Olivo de Lagunilla de Jubera	96	0	0.287	0	5.29924	x
Desconocido de Ausejo -- Picudo de Labata	94			1	5.38747
Desconocido de Ausejo -- Rañinera	96			0	10.3102
Desconocido de Ausejo -- Toffehi Tataouine	96	0	0.26	0	8.51538	x
Desconocido de Ausejo -- Verdale de l'Hérault	96			1	6.25629
Desconocido de Barranco Gracia -- Desconocido del cortijo de Don Pedro	96			1	8.82461
Desconocido de Barranco Gracia -- Escarabajuelo de Posadas	96			1	5.05447
Desconocido de Barranco Gracia -- Lechín de Granada	96	0	0.216	0
Desconocido de Barranco Gracia -- Manzanilla del Piquito	96			2	6.59325
Desconocido de Calahorra -- Empeltre	95	0	0.305	0	9.5483	x
Desconocido de Calahorra -- Redondilla de Logroño	95	0	0.314	0	8.32435	x
Desconocido de Casarias -- Dokkar	96			1	27.76
Desconocido de Casarias -- Jemri Dhokkar-1732	96			1	21.865
Desconocido de Casarias -- Selvatico	96			2	17.0257
Desconocido de Casarias -- VS6	96			2	17.4611
Desconocido de Clavijo_1 -- Machazo de Ribafrecha	96			1	6.5255
Desconocido de Clavijo_1 -- Olivo de Leza	96	0	0.349	0	10.5275	x
Desconocido de Clavijo_1 -- Toffehi Tataouine	96	0	0.242	0	7.84315	x
Desconocido de Clavijo_2 -- Desconocido de Clavijo_3	96			0	10.0696
Desconocido de Clavijo_2 -- Fouji Asli Gafsa	96			1	6.28922
Desconocido de Clavijo_2 -- Gordilla de Cabo de Gata	95	0	0.297	0
Desconocido de Clavijo_2 -- Olivo de Clavijo_1	96	0	0.345	0	7.04643	x
Desconocido de Clavijo_2 -- Olivo de Clavijo_2	96	0	0.308	0	6.47156	x
Desconocido de Clavijo_2 -- Toffehi Tataouine	96	0	0.229	0	5.2182	x
Desconocido de Clavijo_3 -- Genovesa	96	0	0.274	0
Desconocido de Clavijo_3 -- Gordal Sevillana	96	0	0.267	0	5.61924	x
Desconocido de Clavijo_3 -- Bigarude	96	0	0.324	0
Desconocido de Clavijo_3 -- Hendero	96	0	0.342	0	5.41134	x
Desconocido de Clavijo_3 -- Idleb	96	0	0.257	0	4.65577	x
Desconocido de Clavijo_3 -- Mançanal d'Arnes	95	0	0.292	0
Desconocido de Clavijo_3 -- Mauri	96	0	0.32	0	7.88566	x
Desconocido de Clavijo_3 -- Nevadillo Blanco de Jaén	96	0	0.311	0
Desconocido de Clavijo_3 -- Redondilla de Logroño	96	0	0.345	0	7.00332	x
Desconocido de Clavijo_3 -- Sarrut	96	0	0.263	0	7.39852	x
Desconocido de Clavijo_3 -- Tefah	96	0	0.3	0
Desconocido de Clavijo_3 -- Toffehi Tataouine	96	0	0.216	0
Desconocido de Clavijo_3 -- Verdal de Ribafrecha	96			1	5.15812
Desconocido de Clavijo_4 -- Galatistas	96	0	0.305	0	5.45454	x
Desconocido de Clavijo_4 -- Gordal Sevillana	96	0	0.228	0
Desconocido de Clavijo_4 -- Morisca de Mancor	96	0	0.295	0	5.07687	x
Desconocido de Clavijo_4 -- Neral	96			1	6.26118
Desconocido de Clavijo_4 -- Olivo de Alberite	96	0	0.294	0	6.02278	x
Desconocido de Clavijo_4 -- Olivo de Clavijo_2	96			1	9.81904
Desconocido de Clavijo_4 -- Picudo de Bergasa	96	0	0.343	0	9.34665	x
Desconocido de Clavijo_4 -- Toffehi Tataouine	96	0	0.247	0	6.93706	x
Desconocido de Clavijo_4 -- Verdal de Leza	96	0	0.302	0	9.87474	x
Desconocido de Cornago -- Desconocido de Ribafrecha-2511	96			1	9.47714
Desconocido de Cornago -- Hendero	96	0	0.244	0	11.4885	x
Desconocido de Cornago -- Morisca de Mancor	96			2	4.97119
Desconocido de Cornago -- Picalaceña de Cornago	96	0	0.253	0	16.5153	x
Desconocido de Cornago -- Royal de Calatayud	96	0	0.205	0	12.5088	x
Desconocido de Cortija de la Viana -- Desconocido de Zute	94			2	5.45382
Desconocido de Cortija de la Viana -- Klon_14-1812	95			2	5.75203
Desconocido de Cortija de la Viana -- Koroneiki	95			2	7.36387
Desconocido de Cortija de la Viana -- Manzanillera de Huércal Overa	95			1	7.826
Desconocido de Cortija de la Viana -- Olivo de la Albaida	95			1	5.53533
Desconocido de Cortija de la Viana -- Olivo di Mandanici	95			1	5.34782
Desconocido de Cútar -- Ocal Cordobesa	95	0	0.273	0	4.81637	x
Desconocido de Cútar -- Morisca Picuilla	95			1	5.44397
Desconocido de Écija -- Ocal Cordobesa	96	0	0.308	0
Desconocido de Écija -- Picual	96	0	0.319	0	8.45391	x
Desconocido de El Patriarca_2 -- Galega Vulgar	96			2	9.00301
Desconocido de El Patriarca_3 -- Fossenca	92			2	7.32539
Desconocido de El Patriarca_3 -- Olivo de la Albaida	95			1	18.7968
Desconocido de El Patriarca_3 -- VS6	95			2	12.4028
Desconocido de El Patriarca_4 -- Lechín de Sevilla	96			1	8.62668
Desconocido de El Patriarca_4 -- VS6	96			1	8.14495
Desconocido de El Patriarca_5 -- Dokkar	95			1	13.6125
Desconocido de El Patriarca_5 -- El Chatan	95			1	9.15161
Desconocido de El Patriarca_5 -- Mfartah Blettech	95			2	5.88239
Desconocido de El Patriarca_5 -- Ocal Cordobesa	95	0	0.291	0
Desconocido de El Patriarca_5 -- Olivo de l'Albera	95			1	7.94426
Desconocido de El Patriarca_5 -- Resulja	95			2	4.70385
Desconocido de El Patriarca_5 -- Sivigliana da Olio	95			1	8.78307
Desconocido de El Patriarca_5 -- Unknown OZ1	95			2	5.76143
Desconocido de El Patriarca_5 -- VS6	95			2	5.51321
Desconocido de El Patriarca_6 -- Ocal Cordobesa	94	0	0.278	0	6.41933	x
Desconocido de Ibiza_1 -- Dokkar	96			1	37.1951
Desconocido de Ibiza_1 -- Mignolo Cerretano	96			1	20.7669
Desconocido de Ibiza_1 -- VS6	96			2	25.674
Desconocido de Ibiza_2 -- Jeddari Chaal	95			2	16.2717
Desconocido de Ibiza_3 -- Klon_14-1812	95			2	12.2691
Desconocido de Ibiza_3 -- Olivo de la Albaida	95			1	13.2174
Desconocido de Ibiza_3 -- Olivo di Mandanici	95			1	9.09867
Desconocido de Ibiza_3 -- Semni Djebeniana	95			2	10.5186
Desconocido de Ibiza_3 -- Takesrit	94			2	7.4601
Desconocido de Jabalcuz -- Gordal Sevillana	96	0	0.26	0
Desconocido de Jabalcuz -- Grosal de Cieza	96	0	0.298	0
Desconocido de la Albaida -- Gordal Sevillana	96	0	0.2	0
Desconocido de la Albaida -- Zeletni	95			2	5.74116
Desconocido de La Carolina -- Galega Vulgar	94	0	0.286	0	18.216	x
Desconocido de La Carolina -- Picual	94	0	0.277	0	11.6538	x
Desconocido de la Machuca -- Gordal Sevillana	95	0	0.208	0
Desconocido de la Machuca -- Lechín de Granada	95	0	0.286	0	5.44525	x
Desconocido de La Rambla -- Lechín de Sevilla	93	0	0.25	0	8.03643	x
Desconocido de La Rambla -- Menudel	92			1	5.36216
Desconocido de La Rambla -- Picudo	93	0	0.31	0	8.84894	x
Desconocido de Logroño -- Galega Vulgar	96			2	5.20128
Desconocido de Logroño -- Gordal Sevillana	96	0	0.215	0	8.69202	x
Desconocido de Logroño -- Manzanilla de Sevilla	96			1	9.04147
Desconocido de Prado Pitisco -- Madural de Mallorca	95			1	14.8232
Desconocido de Prado Pitisco -- Manzanilla Cacereña	96	0	0.277	0	13.0466	x
Desconocido de Quel-2021 -- Empeltre	96	0	0.28	0	10.5547	x
Desconocido de Quel-2021 -- Redondilla de Logroño	96	0	0.283	0	9.3218	x
Desconocido de Quel-2026 -- Empeltre	96	0	0.263	0	8.60051	x
Desconocido de Quel-2026 -- Redondilla de Logroño	96	0	0.296	0	10.1119	x
Desconocido de Ribafrecha_1 -- Desconocido de Tudelilla	96	0	0.232	0	7.97427	x
Desconocido de Ribafrecha_1 -- Mançanal d'Arnes	95			1	5.33592
Desconocido de Ribafrecha_1 -- Manzanilla Cacereña	96	0	0.281	0
Desconocido de Ribafrecha_1 -- Olivo de Clavijo_2	96	0	0.349	0	9.25778	x
Desconocido de Ribafrecha_1 -- Picudo de Bergasa	96			1	6.49941
Desconocido de Ribafrecha_1 -- Picudo de Labata	94	0	0.348	0	5.5025	x
Desconocido de Ribafrecha_1 -- Toffehi Tataouine	96	0	0.255	0	6.89856	x
Desconocido de Ribafrecha-2510 -- Gordal Sevillana	96	0	0.221	0	4.7975	x
Desconocido de Ribafrecha-2510 -- Lumiaro	96			1	4.6892
Desconocido de Ribafrecha-2510 -- Verdale de l'Hérault	96			1	8.2113
Desconocido de Ribafrecha-2511 -- Gordal Sevillana	96	0	0.179	0
Desconocido de Ribafrecha-2511 -- Hendero	96	0	0.352	0	10.3886	x
Desconocido de Ribafrecha-2511 -- Khnfse	96			1	4.85381
Desconocido de Ribafrecha-2511 -- Negrillo de Ausejo	95			1	7.60159
Desconocido de Ribafrecha-2511 -- Olivo de Clavijo_1	96	0	0.295	0
Desconocido de Ribafrecha-2511 -- Passulunara	96	0	0.277	0	9.34643	x
Desconocido de Ribafrecha-2511 -- Picalaceña de Cornago	96			1	9.05434
Desconocido de Ribafrecha-2511 -- Pizz'e Carroga	96			1	6.93074
Desconocido de Ribafrecha-2511 -- Sinop no 6	96	0	0.309	0	11.0578	x
Desconocido de Santa Fe -- Gordal Sevillana	96	0	0.22	0	6.10312	x
Desconocido de Santa Fe -- Lechín de Granada	96	0	0.23	0
Desconocido de Santa Fe -- Racimal	96			1	6.62939
Desconocido de Santa Fe -- Uovo di Piccione	96	0	0.275	0	8.76906	x
Desconocido de Sojuela_1 -- Desconocido de Villamediana_1	96			1	7.21991
Desconocido de Sojuela_1 -- Galatistas	96	0	0.28	0	5.61219	x
Desconocido de Sojuela_1 -- Gordal Sevillana	96	0	0.24	0	7.18315	x
Desconocido de Sojuela_1 -- Hendero	96	0	0.34	0	7.93699	x
Desconocido de Sojuela_1 -- Itrana	96	0	0.308	0	6.08304	x
Desconocido de Sojuela_1 -- Konservolia	96	0	0.34	0	13.4278	x
Desconocido de Sojuela_1 -- Machazo de Ribafrecha	96			1	5.20663
Desconocido de Sojuela_1 -- Moresca	96	0	0.293	0	9.28955	x
Desconocido de Sojuela_1 -- Olivo de Clavijo_1	96			1	4.93353
Desconocido de Sojuela_1 -- Olivo de Clavijo_3	96			1	4.71316
Desconocido de Sojuela_1 -- Olivo de Leza	96	0	0.35	0	10.909	x
Desconocido de Sojuela_1 -- Olivo de Logroño	96			2	5.36874
Desconocido de Sojuela_1 -- Olivo de Sojuela	96	0	0.314	0	7.28466	x
Desconocido de Sojuela_1 -- Olivo de Villamediana	96	0	0.283	0	7.62356	x
Desconocido de Sojuela_1 -- Pizz'e Carroga	96			1	5.56862
Desconocido de Sojuela_1 -- Rogeta	96	0	0.245	0
Desconocido de Sojuela_1 -- Toffehi Tataouine	96	0	0.217	0	6.20828	x
Desconocido de Sojuela_1 -- Verdal de Leza	96			1	5.82933
Desconocido de Sojuela_1 -- Verdale de l'Hérault	96			2	6.45403
Desconocido de Sojuela_2 -- Picudo de Labata	96	0	0.253	0
Desconocido de Toledo_1 -- Gordal Sevillana	96	0	0.257	0
Desconocido de Toledo_1 -- Lechín de Granada	96	0	0.27	0
Desconocido de Toledo_1 -- Manzanilla Prieta	96			2	6.07711
Desconocido de Toledo_1 -- Negrillo de Arjona	96	0	0.344	0	4.98826	x
Desconocido de Toledo_1 -- Ojo de Liebre	96	0	0.339	0	7.94579	x
Desconocido de Toledo_1 -- Redondilla de Grazalema	96	0	0.35	0	8.05739	x
Desconocido de Toledo_2 -- Gordal Sevillana	96	0	0.248	0	5.10343	x
Desconocido de Toledo_2 -- Lechín de Granada	96	0	0.254	0
Desconocido de Toledo_2 -- Llorón de Atarfe	96			1	5.96521
Desconocido de Toledo_2 -- Nevado Basto	96			1	4.94318
Desconocido de Toledo_2 -- Racimal	96			1	7.93451
Desconocido de Toledo_2 -- Real Sevillana	96	0	0.336	0	6.50958	x
Desconocido de Toledo_2 -- Salgar Redondo	96			1	5.16676
Desconocido de Toledo_2 -- Tachuno	95			1	6.48955
Desconocido de Tudelilla -- Royal de Calatayud	96			1	10.086
Desconocido de Villamediana_1 -- Mochuto	96			2	4.76651
Desconocido de Villamediana_1 -- Moresca	96			1	7.66742
Desconocido de Villamediana_1 -- Picudillo	96			2	5.1166
Desconocido de Villamediana_1 -- Picudo de Labata	94	0	0.34	0	8.45482	x
Desconocido de Villamediana_1 -- Toffehi Tataouine	96	0	0.217	0	6.68779	x
Desconocido de Villamediana_2 -- Empeltre	96	0	0.284	0	10.496	x
Desconocido de Villamediana_2 -- Bigarude	96	0	0.255	0
Desconocido de Zute -- Olivo de Órgiva	95	0	0.258	0	13.9411	x
Desconocido de Zute -- Rougette de Metidja-2500	95			2	8.68005
Desconocido de Zute -- Selvatico	95			2	8.69358
Desconocido de Zute -- Souidi	95			2	4.75721
Desconocido de Zute -- Ulliri i Bardhe i Tiranes-2499	95			2	6.61729
Desconocido del cortijo de Don Pedro -- Cordovil de Serpa	96	0	0.317	0	5.34399	x
Desconocido del cortijo de Don Pedro -- Escarabajuelo de Posadas	96	0	0.311	0	6.05449	x
Desconocido del cortijo de Don Pedro -- Lechín de Sevilla	96	0	0.325	0	12.3189	x
Desconocido del cortijo de Don Pedro -- Manzanilla del Piquito	96	0	0.315	0	12.3447	x
Desconocido del cortijo de Don Pedro -- Rara de Cabra	96			1	6.84885
Dhokkar Nafti -- Jeddari Chaal	96			0	21.1387
Dhokkar Nafti -- Koroneiki	96			2	11.11
Dhokkar Nafti -- Mfartah Blettech	96			2	11.6855
Dhokkar Nafti -- Morruda de Segorbe	95			1	9.62524
Dhokkar Nafti -- Neb Tataouine	96			2	13.7314
Dhokkar Nafti -- Negret	95			1	12.523
Dhokkar Nafti -- Olivastra di Populonia	96			2	12.996
Dhokkar Nafti -- Olivastra Seggianese	96	0	0.354	0	15.6427	x
Dhokkar Nafti -- Olivo de la Albaida	96			2	5.94107
Dhokkar Nafti -- Semni Djebeniana	96			2	13.3178
Dhokkar Nafti -- Takesrit	95			2	8.34622
Dhokkar Nafti -- Zeitoun Boubezzoula	96			2	15.4792
Djabali Kini -- Karme	94			2	12.9818
Djabali Kini -- Saifi	94	0	0.299	0	21.3989	x
Djabali Kini -- Shame	94			2	12.316
Djabali Kini -- Sorani	94			1	8.27526
Djabali Kini -- Zada	94			2	15.2582
Djabali Kini -- Zaity	94			0	14.5924
Doebli -- Majhol-1122	94			2	5.5249
Doebli -- Safrawi	96	0	0.2	0	14.1977	x
Doebli -- Safrawi-1116	95			2	11.4238
Doebli -- Sayfi	96			2	7.35259
Dokkar -- El Chatan	96			2	13.8223
Dokkar -- El Kharfi	96			2	12.5003
Dokkar -- Jeddari Chaal	96			1	17.541
Dokkar -- Jemri Dhokkar-1732	96			1	20.283
Dokkar -- Mignolo Cerretano	96			1	13.9342
Dokkar -- Neb Tataouine	96			2	11.4014
Dokkar -- Olivo de l'Albera	96			2	18.0166
Dokkar -- Olivo di Mandanici	96			2	6.68202
Dokkar -- Semni Djebeniana	96			1	21.4104
Dokkar -- Sivigliana da Olio	96			1	12.4249
Dokkar -- Souabaa Aljia	96			2	7.93583
Dokkar -- Takesrit	95			1	11.6902
Dokkar -- Ulliri i Bardhe i Tiranes-2499	96			2	16.1492
Dokkar -- VS6	96	0	0.23	0	23.9705	x
Dokkar -- Zeletni	95			2	7.46676
Dolça -- Farga	96	0	0.297	0	6.76672	x
Dolce -- El Salam	95			1	5.25311
Dolce -- Kadeshon	95	0	0.243	0
Dolce -- Pidicuddara	95			1	7.52792
Dolce -- Wardan	95			1	5.21134
Dolce Agogia -- Ayvalik	96	0	0.288	0	5.67268	x
Dolce Agogia -- Fossenca	93	0	0.319	0	5.6636	x
Dolce Agogia -- Koutsourelia	96	0	0.271	0	7.91097	x
Dolce Agogia -- Menya	96	0	0.317	0	5.34139	x
Dolce Agogia -- Royal de Calatayud-47	96			1	5.09357
Dolce Agogia -- Safrawi	96	0	0.275	0	5.05172	x
Dolce Agogia -- Souidi	96	0	0.314	0	7.7888	x
Dolce Agogia -- Ulliri i Bardhe i Tiranes	96	0	0.25	0	5.88536	x
Dolce Agogia -- Ulliri i Bardhe i Tiranes-2499	96			1	5.36113
Dolce Agogia -- Verdal de Bovera	96	0	0.286	0	6.61635	x
Domat -- Ayvalik	96	0	0.272	0	12.2122	x
Domat -- Gaydoyrelia	96	0	0.208	0	16.5291	x
Domat -- Khuokhe	95			1	6.97605
Domat -- Royal de Calatayud-47	96			2	5.38452
Domat -- Tío Blas	96			1	4.86147
Domengues -- Ayvalik	96			1	15.1415
Domengues -- Fram	96			1	18.9196
Domengues -- Jemri Bouchouka	96			2	5.49542
Domengues -- Jemri Dhokkar-1907	96			1	7.97285
Domengues -- Karydolia	96			2	5.5831
Domengues -- Kothreiki	96			1	19.6227
Domengues -- Kotruvsi	96			2	15.4242
Domengues -- Manzanella del Mezquin	95			2	14.7272
Domengues -- Masri	96			2	8.51477
Domengues -- Mastoidis	96			2	8.44579
Domengues -- Moixonenca de Rafels	95			1	17.5632
Domengues -- Muixonenca de Torre d' Arques	96			1	12.6314
Domengues -- Negret	95	0	0.179	0
Domengues -- Olivera d'Aransis	96			2	8.12472
Domengues -- Panseñera	96	0	0.325	0	20.6798	x
Domengues -- Reixonenca	96	0	0.293	0	19.7682	x
Domengues -- Rogeta	96	0	0.261	0	12.2211	x
Domengues -- Royal de Sabiñán	96			1	12.3979
Domengues -- Safrawi	96	0	0.287	0	16.0347	x
Domengues -- Sinop no 1	96			1	8.22425
Domengues -- Toffehi Tataouine	96	0	0.329	0	20.8353	x
Domengues -- Trylia	96			2	7.7642
Domengues -- Verdal de Figols	96			2	10.9612
Dopia Pierias -- Gemlik	96			1	7.38081
Dopia Pierias -- Gordal Sevillana	96	0	0.211	0
Dopia Pierias -- Grossanne	96	0	0.327	0	8.56211	x
Dopia Pierias -- Limli	96	0	0.269	0
Dopia Pierias -- Samsun Salamuralik	96			1	5.02281
Dopia Pierias -- Samsun Tuzlamalik	95	0	0.324	0	10.0425	x
Dopia Pierias -- Sinop no 5	95			1	5.68811
Dopia Verias -- Gemlik	96			2	8.41608
Dopia Verias -- Gerboui	96			1	9.28241
Dopia Verias -- Gordal Sevillana	96	0	0.287	0	15.0759	x
Dopia Verias -- Izmir Sofralik	96			1	7.16866
Dopia Verias -- Konservolia	96			1	7.32121
Dopia Verias -- Mançanal d'Arnes	95	0	0.247	0	6.57465	x
Dopia Verias -- Marantelli	96			1	11.8555
Dopia Verias -- Nocellara del Belice	96			1	5.24994
Dopia Verias -- Olivo de Lagunilla de Jubera	96	0	0.261	0	11.3842	x
Dopia Verias -- Olivo de Logroño	96			2	5.38464
Dopia Verias -- Olivo de Murillo de Río Leza	96			1	5.78634
Dopia Verias -- Samanli	95	0	0.269	0	16.7319	x
Dopia Verias -- Samsun Salamuralik	96			1	8.52897
Dopia Verias -- Sinop no 6	96			1	10.3042
Dulzal de Carmona -- Gordal Sevillana	96	0	0.192	0
Dulzal de Carmona -- Grosal de Cieza	96	0	0.342	0	10.2431	x
Dulzal de Carmona -- Habichuelero de Grazalema	96			1	5.85543
Dulzal de Carmona -- Lechín de Granada	96	0	0.274	0	6.83463	x
Dulzal de Carmona -- Nevadillo de Santisteban Pto	96			1	10.7477
Dulzal de Carmona -- Pico Limón	96			1	7.1354
Dulzal de Carmona -- Picudo	96			1	7.07511
Dulzal de Carmona -- Picudo de la Axarquía	96			1	5.26216
Dulzal de Carmona -- Rotondella di Melfi	96			2	6.32416
Dwarf D -- Cordovil de Serpa	96	0	0.261	0
Dwarf D -- Negrillo de la Carlota	96	0	0.274	0	7.48365	x
Dwarf D -- Picholine Marocaine	96	0	0.313	0	13.381	x
Dwarf D -- Uovo di Piccione	96	0	0.258	0	10.2923	x
Edincik -- Gordal Sevillana	95			1	9.11018
Edincik -- Sacakli otur	95	0	0.267	0	10.399	x
Egriburum (Nizip) -- Maarri	96			2	5.98395
Egriburum (Tatayn) -- Karme	96			2	6.76504
Egriburum (Tatayn) -- Khalkhali	96			2	9.06907
Egriburum (Tatayn) -- Khnfse	96			1	9.59602
Egriburum (Tatayn) -- Majhol-1122	94	0	0.203	0	13.291	x
Egriburum (Tatayn) -- Tebabs	96			1	7.4723
Egriburum (Tatayn) -- Zaity	96	0	0.224	0	19.8916	x
El Chatan -- El Kharfi	96			2	10.3551
El Chatan -- Gremignolo di Bolgheri	96			1	5.17827
El Chatan -- Injassi Hchichina	96			2	11.3074
El Chatan -- Jeddari Chaal	96			1	15.8282
El Chatan -- Jemri Dhokkar-1732	96			2	9.00701
El Chatan -- Koroneiki	96			2	8.95361
El Chatan -- Lechín de Granada	96			1	6.72084
El Chatan -- Lianolia Kerkyras	96			1	16.2921
El Chatan -- Liguria	96			2	6.6451
El Chatan -- Llei del Bessó	96			0	17.5509
El Chatan -- Mfartah Blettech	96			0	21.3065
El Chatan -- Moraiolo	96	0	0.287	0	10.4344	x
El Chatan -- Neb Djemel	96			1	7.32059
El Chatan -- Neb Tataouine	96			2	5.95195
El Chatan -- Negret	95			0	16.3715
El Chatan -- Olivastra di Populonia	96	0	0.304	0	16.7611	x
El Chatan -- Olivastra Seggianese	96			0	14.3059
El Chatan -- Olivo de la Albaida	96			1	5.44097
El Chatan -- Rougette de Metidja-2500	96			2	6.08415
El Chatan -- Rougette de Pignan	94			1	5.96813
El Chatan -- Semni Djebeniana	96			1	17.7638
El Chatan -- Takesrit	95			1	5.73775
El Chatan -- Toffehi Tataouine	96	0	0.216	0	7.06606	x
El Chatan -- Zeitoun Boubezzoula	96	0	0.349	0	18.8925	x
El Kharfi -- Griseta	95			1	8.28188
El Kharfi -- Jeddari Chaal	96			2	6.38172
El Kharfi -- Jemri Dhokkar-1732	96			2	10.775
El Kharfi -- Koroneiki	96			2	6.01169
El Kharfi -- Llei del Bessó	96			2	7.27932
El Kharfi -- Mfartah Blettech	96			1	10.7309
El Kharfi -- Olivastra Seggianese	96			1	9.96039
El Kharfi -- Olivo di Mandanici	96	0	0.339	0	10.4722	x
El Kharfi -- Semni Djebeniana	96			2	12.0711
El Kharfi -- Souidi	96			1	9.09632
El Kharfi -- Thiaki	96	0	0.336	0	5.86478	x
El Kharfi -- Ulliri i Bardhe i Tiranes-2499	96			2	5.83191
El Kharfi -- Zeitoun Boubezzoula	96			2	8.59681
El Salam -- Toffahi	96	0	0.185	0	9.01368	x
Elmacik -- Humaisi	96			2	5.89037
Elmacik -- Kerdi	96			0	13.1988
Elmacik -- Khalkhali	96			2	9.41237
Elmacik -- Khnfse	96			2	10.6907
Elmacik -- Maarri	96			2	5.57292
Elmacik -- Majhol-1059	96			2	4.9005
Elmacik -- Majhol-1122	94			2	5.28881
Elmacik -- Zaity	96	0	0.25	0	21.5269	x
Emilia -- Safrawi	95	0	0.27	0	7.92437	x
Empeltre -- Lo Parot	96	0	0.27	0	8.44311	x
Empeltre -- Managjel	96	0	0.277	0	10.2455	x
Empeltre -- S:27_4	95	0	0.224	0	6.26177	x
Empeltre -- Safrawi	96	0	0.272	0	7.04479	x
Empeltre -- Sinop no 1	96	0	0.216	0	5.60597	x
Empeltre -- Stara Maslina-1999	95			1	6.16333
Empeltre -- Tounsi Gafsa	96	0	0.234	0	6.11016	x
Empeltre -- Ulliri i Bardhe i Tiranes-2499	96			1	6.83022
Empeltre -- Verdal de Bovera	96	0	0.292	0	9.32423	x
Ensasi -- Kan Celebi	95	0	0.235	0	10.4519	x
Ensasi -- Moixonenca de Rafels	95			2	5.2771
Ensasi -- Safrawi	96	0	0.241	0	13.0198	x
Ensasi -- Toffahi-SYR	96			1	8.26493
Ensasi -- Zael Almuhra	96	0	0.234	0	18.2016	x
erdal de Bovera -- Griseta	95	0	0.317	0
erdal de Bovera -- Leccio Maremmano	95	0	0.24	0
erdal de Bovera -- Safrawi	96	0	0.247	0
Escarabajillo -- Gordal Sevillana	95	0	0.245	0
Escarabajillo -- Jaropo	95			1	5.07636
Escarabajillo -- Lechín de Granada	95	0	0.263	0
Escarabajillo -- Nevadillo de Santisteban Pto	95			1	5.22916
Escarabajillo -- Nevado Azul	95	0	0.333	0	8.66086	x
Escarabajillo -- Olivo de Mallorca_1	95			1	4.72192
Escarabajillo -- Picholine Marocaine	95			1	6.0612
Escarabajillo -- Tempranillo de Lucena	95			1	7.48163
Escarabajillo -- Unknown OZ1	95			1	5.14058
Escarabajillo -- Zorzaleño de Granada	95	0	0.345	0	8.23149	x
Escarabajo -- Gordal Sevillana	96	0	0.248	0	6.50301	x
Escarabajo -- Jaropo	96			1	6.39493
Escarabajo -- Lechín de Granada	96	0	0.219	0
Escarabajo -- Nevadillo de Santisteban Pto	96	0	0.321	0	8.54923	x
Escarabajo -- Olivo de la Noria	96	0	0.336	0	7.87987	x
Escarabajo -- Rechino	96	0	0.353	0	8.75316	x
Escarabajo -- Verdial de Alcalá la Real	95			1	7.07465
Escarabajuelo de Atarfe -- Cerezuela	96			1	10.8262
Escarabajuelo de Atarfe -- Lechín de Granada	96	0	0.25	0	6.24159	x
Escarabajuelo de Atarfe -- Manzanilla de Almería	96			2	5.47634
Escarabajuelo de Atarfe -- Nevado Basto	96			2	5.55136
Escarabajuelo de Atarfe -- Négrette	96			1	5.60436
Escarabajuelo de Posadas -- Gordal Sevillana	96	0	0.27	0
Escarabajuelo de Posadas -- Kelb et Ter	96	0	0.229	0
Escarabajuelo de Posadas -- Lechín de Granada	96	0	0.282	0
Escarabajuelo de Posadas -- Macho de Vilches	96			1	5.01193
Escarabajuelo de Posadas -- Manzanilla de Montefrío	96			1	5.9199
Escarabajuelo de Posadas -- Verdial de Alcalá la Real	95			1	7.04867
Faresana -- Fasolona	96	0	0.247	0	12.0942	x
Faresana -- Gordal Sevillana	96	0	0.219	0	8.0592	x
Faresana -- San Francesco	96	0	0.279	0	13.5397	x
Faresana -- Teta de la Vaca	96			1	10.023
Farga -- Farga Mora	96	0	0.275	0	11.3013	x
Farga -- Figueretes	95	0	0.299	0	14.5674	x
Farga -- Forastera de Tortosa	96	0	0.248	0	8.19889	x
Farga -- Godallera	96	0	0.271	0	11.7033	x
Farga -- Jemri Dhokkar-1907	96			1	5.6775
Farga -- Lloma	96	0	0.224	0	6.72526	x
Farga -- Llumeta	96	0	0.218	0	8.8239	x
Farga -- Madonna dell'Impruneta	96	0	0.25	0	5.96042	x
Farga -- Mançanenca de Batea	96	0	0.271	0	6.68958	x
Farga -- Mignolo Cerretano	96			1	5.29967
Farga -- Moraiolo	96			1	6.6797
Farga -- Pascual_1	96	0	0.245	0	6.98948	x
Farga -- Patrón de Cabús	96	0	0.282	0	14.8357	x
Farga -- Picuda de Luis	96	0	0.29	0	9.18443	x
Farga -- Rojal	96	0	0.198	0	7.88521	x
Farga -- Rufina	96	0	0.291	0	9.57089	x
Farga -- Safrawi	96	0	0.243	0
Farga -- Thiaki	96	0	0.287	0
Farga -- Valentins	96	0	0.305	0	8.70082	x
Farga -- Vallesa	96	0	0.282	0	11.5565	x
Fasolina -- Fasolona	96	0	0.25	0	13.22	x
Fasolina -- Rossellino	96			1	6.62219
Fishomi -- Gerdeh	96	0	0.275	0	19.4296	x
Fishomi -- Rowghani	96	0	0.219	0	17.865	x
Fishomi -- Shengeh Manjil	96			1	17.3204
Fontllonga -- Bigarude	96	0	0.257	0
Fontllonga -- Kaissy	96			1	6.57001
Fontllonga -- Limli	96			1	5.56215
Fontllonga -- Mahati-1010	96			1	8.39502
Fontllonga -- Manzanella del Mezquin	95			1	5.6989
Fontllonga -- Moixonenca de Rafels	95			2	5.10583
Fontllonga -- Rogeta	96			1	7.86108
Fontllonga -- Roieta	96			1	10.6537
Fontllonga -- Safrawi	96			1	5.17119
Fontllonga -- Valanolia	96			1	5.85574
Fontllonga -- Verdal de Barcedana	96			2	5.49987
Fontllonga -- Verdal del Pallars	95	0	0.333	0	11.7102	x
Fontllonga -- Yag Celebi (Tatayn)	96			1	7.66511
Fossenca -- Koroneiki	93	0	0.303	0	10.2378	x
Fossenca -- Koutsourelia	93	0	0.265	0	8.75352	x
Fossenca -- Menya	93			1	5.53004
Fossenca -- Olivo di Mandanici	93			1	5.57357
Fossenca -- Royal de Calatayud-47	93	0	0.196	0
Fossenca -- Safrawi	93	0	0.231	0
Fossenca -- Stara Maslina-1999	92	0	0.24	0	6.10391	x
Fouji Asli Gafsa -- Jemri Bouchouka	96	0	0.234	0	15.3798	x
Fouji Asli Gafsa -- Nocellara del Belice	96	0	0.276	0	11.0194	x
Fouji Asli Gafsa -- Olivo de Clavijo_3	96	0	0.241	0	8.88347	x
Fram -- Grossanne	96			1	5.66695
Fram -- Karydolia	96			2	4.71543
Fram -- Managjel	96			1	9.99729
Fram -- Moraiolo	96			2	6.72347
Fram -- Muixonenca de Torre d' Arques	96			2	12.2528
Fram -- Panseñera	96			2	12.3063
Fram -- Reixonenca	96			1	18.6127
Fram -- Rogeta	96			2	7.72452
Fram -- Royal de Sabiñán	96			2	9.51733
Fram -- Safrawi	96	0	0.222	0	14.5994	x
Fram -- Sinop no 1	96			1	10.7905
Fram -- Toffehi Tataouine	96	0	0.263	0	19.379	x
Fram -- Ulliri i Bardhe i Tiranes	96			1	15.2165
Fram -- Verdal de Figols	96			2	15.4258
Frantoio -- Cástula	96	0	0.191	0	15.6474	x
Frantoio -- Favolosa	95	0	0.204	0	16.1179	x
Frantoio -- Grappolo	96	0	0.257	0	12.9195	x
Frantoio -- Grassois	96	0	0.239	0	18.4324	x
Frantoio -- Gremignolo di Bolgheri	96	0	0.319	0	13.7629	x
Frantoio -- Jemri Dhokkar-1732	96			2	11.0327
Frantoio -- Jemri Dhokkar-1907	96			1	8.92796
Frantoio -- Leccino	96	0	0.252	0	14.1668	x
Frantoio -- Leccione	96	0	0.269	0	12.8577	x
Frantoio -- Lianolia Kerkyras	96			1	9.9934
Frantoio -- Liguria	96			1	11.8209
Frantoio -- Maurino	96	0	0.271	0	15.2347	x
Frantoio -- Mfartah Blettech	96			2	5.38929
Frantoio -- Mignolo	96	0	0.283	0	12.9696	x
Frantoio -- Olivo di Casavecchia	96	0	0.2	0	11.4254	x
Frantoio -- Olivo di San Lorenzo	96	0	0.211	0	15.1492	x
Frantoio -- Ornellaia	96	0	0.28	0	14.972	x
Frantoio -- Pendolino	96	0	0.269	0	13.6658	x
Frantoio -- Piangente	95	0	0.315	0	16.582	x
Frantoio -- Urgavona	96	0	0.223	0	16.1316	x
Fulla de Salze -- Patronet	96			1	13.7435
Fulla de Salze -- Sevillenca	96	0	0.207	0	13.1786	x
Galatistas -- Gordal Sevillana	96	0	0.229	0
Galatistas -- Mochuto	96			1	4.83153
Galatistas -- Pajarera	96	0	0.306	0	4.65278	x
Galega Vulgar -- Gordal Sevillana	96	0	0.2	0	7.34491	x
Galega Vulgar -- Kalokerida	96			1	8.87231
Galega Vulgar -- Lentisca	96	0	0.218	0	14.6635	x
Galega Vulgar -- Sandalio	96	0	0.23	0	15.8923	x
Gemlik -- Gordal Sevillana	96	0	0.225	0	8.95245	x
Gemlik -- Gorvele	96			1	12.1997
Gemlik -- Macho de Galilea	96			1	7.51065
Gemlik -- Marantelli	96			1	12.9676
Gemlik -- Memecik	96			1	6.81444
Gemlik -- Olivo de Lagunilla de Jubera	96			1	7.13774
Gemlik -- Samanli	95	0	0.338	0	20.0897	x
Gemlik -- Samsun Salamuralik	96			2	6.05994
Gemlik -- Samsun Tuzlamalik	95			0	16.6931
Gemlik -- Sati	96	0	0.354	0	20.9154	x
Gemlik -- Sinop no 6	96			2	5.58018
Gemlik -- Uovo di Piccione	96			1	8.77906
Genovesa -- Gorda Limoncillo	96	0	0.277	0
Genovesa -- Gordal Sevillana	96	0	0.279	0	6.65466	x
Genovesa -- Llimonenca	96			0	14.5789
Genovesa -- Lloma	96	0	0.26	0	7.24707	x
Genovesa -- Olaya	96	0	0.294	0	6.85113	x
Genovesa -- Olivo de Maura	96	0	0.236	0
Genovesa -- Picudo de Labata	94	0	0.295	0
Genovesa -- Redondilla de Logroño	96	0	0.327	0	6.49997	x
Genovesa -- Sepriana	95			1	8.74336
Genovesa -- Sinop no 6	96	0	0.311	0	7.14035	x
Genovesa -- Villalonga	96	0	0.327	0	10.2748	x
Gerboui -- Nocellara del Belice	96			1	6.69857
Gerboui -- Olivoner	94			2	7.57001
Gerboui -- Royal de Sabiñán	96			2	6.62155
Gerboui -- Sacakli otur	95	0	0.213	0	6.60009	x
Gerboui -- Safrawi	96	0	0.207	0	13.2412	x
Gerboui -- Samsun Tuzlamalik	95			1	5.85445
Gerdeh -- Rowghani	96	0	0.215	0	14.3909	x
Gerdeh -- Shengeh Manjil	96			1	13.8796
Gerdeh -- Yaglik Celebi	95			2	6.48401
Gerdeh -- Zard	96			2	10.5744
Gileta -- Lechín de Sevilla	96	0	0.278	0	13.333	x
Gileta -- Villalonga	96			1	9.46652
Gorda Limoncillo -- Gordal Sevillana	96	0	0.271	0	5.25079	x
Gorda Limoncillo -- Lechín de Granada	96	0	0.233	0
Gorda Limoncillo -- Manzanilla de Alfarnatejo	95			1	6.95605
Gorda Limoncillo -- Negrillo de Iznalloz	96	0	0.342	0	8.81733	x
Gorda Limoncillo -- Royal	96	0	0.284	0
[truncated: 1,699 more rows]

## Sheet: Table S3
Offspring (OFF) ID	Parent Pair (First Candidate@Second Candidate; FC@SC)	Trio LOD score	CpDNA OFF	CpDNA FC	CpDNA SC	Stig FC	Stig SC	NOTES	Structure info for OFF			Q>0.75	Region of cultivation	Structure info for FC parent			Q>0.75	Region of cultivation	Structure info for SC parent			Q>0.75	Region of cultivation
Abou Kanani	Mahati-846@Jlot	47.4662	E1	0	E1.1	dG2	dG1	Stigmatic group of both parents deduced from other trios	0.991397	9.9991e-05	0.00850301	A	EM	0.9998	9.999e-05	9.999e-05	A	EM	0.9998	9.999e-05	9.999e-05	A	EM
Abunara	Toffehi Tataouine@Gordal Sevillana	24.439	E1.2	dE1.1	E1.2	dG2	G1	SC deduced as mother according to chlorotype information. FC chlorotype deduced from other trios. FC stigmatic group deduced	0.45323	9.9991e-05	0.54667	ADMIX	CM	0.774554	0.225346	9.9991e-05	A	CM	0.447061	0.108445	0.444494	ADMIX	WM
Aceitunero-2249	Nación@Bolvino	33.462	0	0	E1.1	dG2	dG1	Stigmatic group of both parents deduced from other trios	0.809774	9.9991e-05	0.190126	A	WM	0.613429	9.9991e-05	0.386471	ADMIX	WM	0.984537	9.9991e-05	0.0153634	A	WM
Aceituno de Alberite	Toffehi Tataouine@Gordal Sevillana	25.9509	0	dE1.1	E1.2	dG2	G1	FC chlorotype deduced from other trios. Stigmatic group deduced	0.476504	9.9991e-05	0.523396	ADMIX	WM	0.774554	0.225346	9.9991e-05	A	CM	0.447061	0.108445	0.444494	ADMIX	WM
Aggizi Oshime	Balady@Aggizi Akse	58.381	E1.2	E1.2	E1.1	dG2	dG1	FC deduced as mother according to chlorotype information. Stigmatic group of both parents deduced from other trios	0.775868	0.186425	0.0377073	A	EM	0.734551	0.149336	0.116112	ADMIX	EM	0.727718	0.000308488	0.271974	ADMIX	EM
Agouromanakolia	Toffehi Tataouine@Safrawi	37.9664	E1.1	dE1.1	E1.1	dG2	G1	FC chlorotype deduced from other trios. Stigmatic group deduced	0.950717	9.9991e-05	0.0491832	A	CM	0.774554	0.225346	9.9991e-05	A	CM	0.9998	9.999e-05	9.999e-05	A	EM
Aharoune	Bouchouk Lafayette@Chemlal de Kabylie	26.5099	E3.2	E1.1	E3.2	#N/A	Androesterility	SC deduced as mother according to chlorotype and androesterility information	0.338455	0.210488	0.451057	ADMIX	CM	0.622242	9.9991e-05	0.377658	ADMIX	CM	9.9991e-05	0.641352	0.358548	ADMIX	CM
Ahia-Ousbaa	Jemri Bouchouka@Khadraia	35.8277	E2.1	E1.1	E2.1	G1	dG2	SC deduced as mother according to chlorotype information. SC stigmatic group deduced	0.582136	0.417764	9.9991e-05	ADMIX	CM	0.809987	0.132483	0.0575298	A	CM	0.30461	0.631305	0.0640852	ADMIX	CM
Aimel	Caninese@Olivastra Seggianese	22.7396	E1.1	E2.N5	E1.1	G2	dG1	SC deduced as mother according to chlorotype information. SC stigmatic group deduced	9.9991e-05	0.913549	0.0863512	B	CM	0.027997	0.953793	0.0182098	B	CM	9.9991e-05	0.857491	0.142409	B	CM
Aitana	Safrawi@Nocellara del Belice	29.3214	E1.1	E1.1	E1.1	G1	G2		0.903581	0.0943972	0.00202183	A	CM	0.9998	9.999e-05	9.999e-05	A	EM	0.628682	9.9991e-05	0.371218	ADMIX	CM
Aixalà	Arbequina@Verdiell	33.9885	0	E1.1	0	G1	G2		0.505985	0.493915	9.9991e-05	ADMIX	WM	0.354721	0.611333	0.0339462	ADMIX	WM	0.220476	0.702444	0.0770804	ADMIX	WM
Alameño de Montilla	Gordal Sevillana@Lechín de Granada	23.494	E1.1	E1.2	E1.1	G1	dG2	SC deduced as mother according to chlorotype information. SC stigmatic group deduced	0.0469595	9.9991e-05	0.952941	C	WM	0.447061	0.108445	0.444494	ADMIX	WM	0.189028	0.717782	0.0931903	ADMIX	WM
Albas	Royal de Calatayud@Verdiell	29.3913	0	0	0	dG1	G2	FC stigmatic group deduced	0.259901	0.135438	0.604661	ADMIX	WM	0.41177	0.00385633	0.584374	ADMIX	WM	0.220476	0.702444	0.0770804	ADMIX	WM
Aloreña-829	Gordal Sevillana@Morchiaio	30.5552	0	E1.2	E1.1	G1	G2		0.288048	0.101169	0.610783	ADMIX	WM	0.447061	0.108445	0.444494	ADMIX	WM	0.384608	0.448984	0.166408	ADMIX	CM
Alquecerana	Neral@Claramunt	27.7231	0	0	0	dG2	G1	FC stigmatic group deduced	0.642886	0.235211	0.121903	ADMIX	WM	0.598471	9.9991e-05	0.401429	ADMIX	WM	0.938353	0.0615473	9.9991e-05	A	WM
Amargoso	Toffehi Tataouine@Gordal Sevillana	29.9659	E1.1	dE1.1	E1.2	dG2	G1	FC chlorotype deduced. FC deduced as mother according to chlorotype information. FC stigmatic group deduced	0.539027	9.9991e-05	0.460873	ADMIX	WM	0.774554	0.225346	9.9991e-05	A	CM	0.447061	0.108445	0.444494	ADMIX	WM
Americano	Piangente@Grappolo	26.5942	E1.1	E1.1	E1.1	G2	G1		0.445544	0.454588	0.0998673	ADMIX	CM	0.124133	0.663737	0.21213	ADMIX	CM	0.114112	0.593287	0.292601	ADMIX	CM
Arbequí Blanc	Arbequina@Verdal del Pallars	32.9996	0	E1.1	0	G1	dG2	SC stigmatic group deduced	0.480209	0.446305	0.0734859	ADMIX	WM	0.354721	0.611333	0.0339462	ADMIX	WM	0.613022	9.9991e-05	0.386878	ADMIX	WM
Arbosana	Arbequina@Vaneta	33.6749	E1.1	E1.1	0	G1	dG2	SC stigmatic group deduced	0.158282	0.620154	0.221564	ADMIX	WM	0.354721	0.611333	0.0339462	ADMIX	WM	0.317279	0.462568	0.220152	ADMIX	WM
Arroniz	Toffehi Tataouine@Gordal Sevillana	27.044	0	dE1.1	E1.2	dG2	G1	FC chlorotype deduced from other trios. Stigmatic group deduced	0.418488	9.9991e-05	0.581412	ADMIX	WM	0.774554	0.225346	9.9991e-05	A	CM	0.447061	0.108445	0.444494	ADMIX	WM
Ascolana Huasco	Azapa @Empeltre	29.5303	dE1.1	E1.1	E1.1	dG2	G1	Off chlorotype deduced according to parents chlorotype information. FC stigmatic group deduced	0.341232	0.303693	0.355074	ADMIX	WM	9.999e-05	9.999e-05	0.9998	C	WM	0.364114	0.479053	0.156833	ADMIX	WM
Ascolana Tenera	Gordal Sevillana@Morchiaio	30.5421	E1.1	E1.2	E1.1	G1	G2	SC deduced as mother according to chlorotype information	0.585557	0.0209258	0.393517	ADMIX	CM	0.447061	0.108445	0.444494	ADMIX	WM	0.384608	0.448984	0.166408	ADMIX	CM
Asnal	Gordal Sevillana@Lechín de Granada	25.5493	E1.1	E1.2	E1.1	G1	dG2	SC deduced as mother according to chlorotype information. SC stigmatic group deduced	9.9991e-05	0.00608025	0.99382	C	WM	0.447061	0.108445	0.444494	ADMIX	WM	0.189028	0.717782	0.0931903	ADMIX	WM
Ayrouni-1599	Toffahi-SYR@Megaron	24.9501	0	E1.1	E2.2	#N/A	#N/A		0.930379	9.9991e-05	0.069521	A	EM	0.86805	0.0127607	0.119189	A	EM	0.647488	9.9991e-05	0.352412	ADMIX	CM
Ayvalik	Toffehi Tataouine@Safrawi	31.7664	E1.1	dE1.1	E1.1	dG2	G1	FC chlorotype deduced from other trios. Stigmatic group deduced	0.760587	0.173913	0.0654999	A	EM	0.774554	0.225346	9.9991e-05	A	CM	0.9998	9.999e-05	9.999e-05	A	EM
Azapa	Gordal Sevillana@Lechín de Granada	26.3012	E1.1	E1.2	E1.1	G1	dG2	SC deduced as mother according to chlorotype information. SC stigmatic group deduced	9.999e-05	9.999e-05	0.9998	C	WM	0.447061	0.108445	0.444494	ADMIX	WM	0.189028	0.717782	0.0931903	ADMIX	WM
Azul	Gordal Sevillana@Lechín de Granada	26.8124	E1.1	E1.2	E1.1	G1	dG2	SC deduced as mother according to chlorotype information. SC stigmatic group deduced	9.999e-05	9.999e-05	0.9998	C	WM	0.447061	0.108445	0.444494	ADMIX	WM	0.189028	0.717782	0.0931903	ADMIX	WM
Barnea	Chemlali Sfax@Balady	34.7604	E1.1	E1.1	E1.2	dG1	dG2	FC deduced as mother according to chlorotype information. Stigmatic group of both parents deduced from other trios	0.285659	0.22649	0.487851	ADMIX	EM	9.999e-05	0.9998	9.999e-05	B	CM	0.734551	0.149336	0.116112	ADMIX	EM
Bathni	Baladi@Rosai-2254	36.0142	0	E1.1	0	G2	dG1	SC stigmatic group deduced	0.901241	0.0853086	0.0134501	A	EM	0.839484	0.0215472	0.138969	A	EM	0.853786	0.124448	0.0217663	A	EM
Bez el Anza	Chemlali Sfax@Balady	21.5523	E1.1	E1.1	E1.2	dG1	dG2	FC deduced as mother according to chlorotype information. Stigmatic group of both parents deduced from other trios	0.28673	0.262343	0.450927	ADMIX	EM	9.999e-05	0.9998	9.999e-05	B	CM	0.734551	0.149336	0.116112	ADMIX	EM
Bolvino	Negral de Bierge@Royeta de Abizanda	35.7161	E1.1	0	0	#N/A	#N/A		0.984537	9.9991e-05	0.0153634	A	WM	0.996821	0.00307911	9.9991e-05	A	WM	0.596262	0.0162326	0.387505	ADMIX	WM
Bouchouika	Gordal Sevillana@Lechín de Granada	25.5939	E1.1	E1.2	E1.1	G1	dG2	SC deduced as mother according to chlorotype information. SC stigmatic group deduced	0.0725205	9.9991e-05	0.92738	C	WM	0.447061	0.108445	0.444494	ADMIX	WM	0.189028	0.717782	0.0931903	ADMIX	WM
Buga	Gordal Sevillana@Morchiaio	28.1134	E1.1	E1.2	E1.1	G1	G2	SC deduced as mother according to chlorotype information	0.423636	0.117619	0.458745	ADMIX	CM	0.447061	0.108445	0.444494	ADMIX	WM	0.384608	0.448984	0.166408	ADMIX	CM
Buharica	Gordal Sevillana@Morchiaio	27.9501	0	E1.2	E1.1	G1	G2		0.43903	9.9991e-05	0.56087	ADMIX	CM	0.447061	0.108445	0.444494	ADMIX	WM	0.384608	0.448984	0.166408	ADMIX	CM
Buidiego	Gordal Sevillana@Lechín de Granada	25.7145	E1.1	E1.2	E1.1	G1	dG2	SC deduced as mother according to chlorotype information. SC stigmatic group deduced	9.999e-05	9.999e-05	0.9998	C	WM	0.447061	0.108445	0.444494	ADMIX	WM	0.189028	0.717782	0.0931903	ADMIX	WM
Buža	Gordal Sevillana@Morchiaio	25.1331	0	E1.2	E1.1	G1	G2		0.478225	9.9991e-05	0.521675	ADMIX	CM	0.447061	0.108445	0.444494	ADMIX	WM	0.384608	0.448984	0.166408	ADMIX	CM
Cairo_7	Manzanilla de Sevilla@Chemlali Sfax	28.1831	E1.1	E1.1	E1.1	G2	dG1	SC stigmatic group deduced	0.0862725	0.37754	0.536188	ADMIX	EM	9.9991e-05	0.0142218	0.985678	C	WM	9.999e-05	0.9998	9.999e-05	B	CM
Calles_1	Sollana@Morruda de Segorbe	29.4845	0	0	0	dG2	G1	FC stigmatic group deduced	0.212286	0.354653	0.433061	ADMIX	WM	0.692702	0.307198	9.9991e-05	ADMIX	WM	0.0637862	0.513711	0.422503	ADMIX	WM
Caninese	Lianolia Kerkyras@Joanenca	26.1455	E2.N5	E2.2	0	dG1	G2	FC stigmatic group deduced	0.027997	0.953793	0.0182098	B	CM	9.9991e-05	0.906993	0.0929067	B	CM	0.314402	0.681709	0.00388932	ADMIX	WM
Carrasco	Cuquello de la Jana @Morruda de Segorbe	29.3466	dE3.1	dE3.1	0	dG2; Androesterelity	G1	FC stigmatic group deduced; FC chlorotype deduced from other trios; Off chlorotype deduced according to parents chlorotype information and androesterility	0.190382	0.412678	0.396939	ADMIX	WM	0.277361	0.42094	0.301699	ADMIX	WM	0.0637862	0.513711	0.422503	ADMIX	WM
Carrasqueña Huasco	Azapa @Leccino	30.4836	dE1.1	E1.1	E1.1	dG2	G1	Off chlorotype deduced according to parents chlorotype information. FC stigmatic group deduced	0.0465645	0.180719	0.772716	C	WM	9.999e-05	9.999e-05	0.9998	C	WM	0.3057	0.619	0.0753007	ADMIX	CM
Carrasqueño de la Sierra	Gordal Sevillana@Lechín de Granada	26.9824	E1.1	E1.2	E1.1	G1	dG2	SC deduced as mother according to chlorotype information. SC stigmatic group deduced	0.0237813	9.9991e-05	0.976119	C	WM	0.447061	0.108445	0.444494	ADMIX	WM	0.189028	0.717782	0.0931903	ADMIX	WM
Carrasquillo	Gordal Sevillana@Lechín de Granada	27.5507	E1.1	E1.2	E1.1	G1	dG2	SC deduced as mother according to chlorotype information. SC stigmatic group deduced	9.9991e-05	0.0685778	0.931322	C	WM	0.447061	0.108445	0.444494	ADMIX	WM	0.189028	0.717782	0.0931903	ADMIX	WM
Carrelluda	Claramunt@Verdal del Pallars	37.6624	0	0	0	G1	dG2	SC stigmatic group deduced	0.936143	0.0637565	9.9991e-05	A	WM	0.938353	0.0615473	9.9991e-05	A	WM	0.613022	9.9991e-05	0.386878	ADMIX	WM
Castellana	Gordal Sevillana@Lechín de Granada	25.3442	E1.1	E1.2	E1.1	G1	dG2	SC deduced as mother according to chlorotype information. SC stigmatic group deduced	0.0298425	9.9991e-05	0.970057	C	WM	0.447061	0.108445	0.444494	ADMIX	WM	0.189028	0.717782	0.0931903	ADMIX	WM
Cástula	Frantoio@Arbosana	35.8995	dE1.1	E1.1	E1.1	G1	G2	Off chlorotype deduced according to parents chlorotype information	0.232892	0.603645	0.163463	ADMIX	WM	0.129238	0.870662	9.9991e-05	B	CM	0.158282	0.620154	0.221564	ADMIX	WM
Cerruda de Liesa	Toffehi Tataouine@Gordal Sevillana	27.7104	0	dE1.1	E1.2	dG2	G1	FC chlorotype deduced from other trios. Stigmatic group deduced	0.448391	9.9991e-05	0.551509	ADMIX	WM	0.774554	0.225346	9.9991e-05	A	CM	0.447061	0.108445	0.444494	ADMIX	WM
Cerruda de Olvena	Toffehi Tataouine@Gordal Sevillana	27.3716	0	dE1.1	E1.2	dG2	G1	FC chlorotype deduced from other trios. Stigmatic group deduced	0.400308	9.9991e-05	0.599592	ADMIX	WM	0.774554	0.225346	9.9991e-05	A	CM	0.447061	0.108445	0.444494	ADMIX	WM
Changlot Real	Genovesa@Lechín de Granada	25.4743	E1.1	0	E1.1	dG1	dG2	Stigmatic group of both parents deduced from other trios	0.151715	0.176857	0.671428	ADMIX	WM	0.524185	0.104222	0.371593	ADMIX	WM	0.189028	0.717782	0.0931903	ADMIX	WM
Chemlali Ghraiba	Chemlali Sfax@Balhi Sig	24.1579	0	E1.1	0	dG1	dG2	Stigmatic group of both parents deduced from other trios	0.0589837	0.868377	0.0726394	B	CM	9.999e-05	0.9998	9.999e-05	B	CM	9.9991e-05	0.720931	0.278969	ADMIX	CM
Chemlali Meliane	Chemlali Sfax@Chemlali Zarzis	36.8459	0	E1.1	0	dG1	dG2	Stigmatic group of both parents deduced from other trios	0.231414	0.768486	9.9991e-05	B	CM	9.999e-05	0.9998	9.999e-05	B	CM	9.9991e-05	0.947087	0.0528128	B	CM
Chemlali Zarzis	Toffehi Tataouine@Dokkar	46.8812	0	dE1.1	E3	dG2	dG1	FC chlorotype deduced from other trios. Stigmatic group of both parents deduced from other trios	9.9991e-05	0.947087	0.0528128	B	CM	0.774554	0.225346	9.9991e-05	A	CM	9.999e-05	0.9998	9.999e-05	B	CM
Chiquitita	Arbequina@Picual	28.373	dE1.1	E1.1	E1.1	G1	G2	Off chlorotype deduced according to parents chlorotype information	0.575415	0.221102	0.203483	ADMIX	WM	0.354721	0.611333	0.0339462	ADMIX	WM	0.0371273	9.9991e-05	0.962773	C	WM
Chorrúo de Castro del Río	Gordal Sevillana@Lechín de Granada	23.9828	0	E1.2	E1.1	G1	dG2	SC stigmatic group deduced	0.00670674	9.9991e-05	0.993193	C	WM	0.447061	0.108445	0.444494	ADMIX	WM	0.189028	0.717782	0.0931903	ADMIX	WM
Claramunt	Toffehi Tataouine@Safrawi	37.1383	dE1.1	dE1.1	E1.1	dG2	G1	Off chlorotype deduced according to parents chlorotype information. FC chlorotype deduced from other trios. FC stigmatic group deduced	0.938353	0.0615473	9.9991e-05	A	WM	0.774554	0.225346	9.9991e-05	A	CM	0.9998	9.999e-05	9.999e-05	A	EM
Colomar	Bolvino@Verdal del Pallars	35.889	0	E1.1	0	dG1	dG2	Stigmatic group of both parents deduced from other trios	0.889188	9.9991e-05	0.110712	A	WM	0.984537	9.9991e-05	0.0153634	A	WM	0.613022	9.9991e-05	0.386878	ADMIX	WM
Cordovil de Serpa	Gordal Sevillana@Lechín de Granada	27.0263	E1.1	E1.2	E1.1	G1	dG2	SC deduced as mother according to chlorotype information. SC stigmatic group deduced	9.9991e-05	0.045186	0.954714	C	WM	0.447061	0.108445	0.444494	ADMIX	WM	0.189028	0.717782	0.0931903	ADMIX	WM
Cornicabra	Gordal Sevillana@Lechín de Granada	23.3541	E1.1	E1.2	E1.1	G1	dG2	SC deduced as mother according to chlorotype information. SC stigmatic group deduced	0.0400691	9.9991e-05	0.959831	C	WM	0.447061	0.108445	0.444494	ADMIX	WM	0.189028	0.717782	0.0931903	ADMIX	WM
Cornicabra de Jerez Caballeros	Gordal Sevillana@Lechín de Granada	25.9257	0	E1.2	E1.1	G1	dG2	SC stigmatic group deduced	9.9991e-05	0.0208053	0.979095	C	WM	0.447061	0.108445	0.444494	ADMIX	WM	0.189028	0.717782	0.0931903	ADMIX	WM
Cornicabra de Mérida	Verdial de Badajoz@Galega Vulgar	38.6662	0	E1.1	E1.2	G2	dG1	SC stigmatic group deduced	0.0191859	0.324755	0.656059	ADMIX	WM	9.9991e-05	0.0245247	0.975375	C	WM	9.9991e-05	0.208032	0.791868	C	WM
Cuquello de la Jana	Farga@Manzanilla Cacereña	25.8914	dE3.1	E3.1	E1.1	G1; ANDROEST	G2	FC deduced as mother according to chlorotype and androesterlity information. Offspring chlorotype deduced	0.277361	0.42094	0.301699	ADMIX	WM	0.324548	0.503034	0.172418	ADMIX	WM	9.999e-05	9.999e-05	0.9998	C	WM
D. de Egipto	Chemlali Sfax@Balady	33.472	0	E1.1	E1.2	dG1	dG2	Stigmatic group of both parents deduced from other trios	0.288347	0.422633	0.28902	ADMIX	EM	9.999e-05	0.9998	9.999e-05	B	CM	0.734551	0.149336	0.116112	ADMIX	EM
Datilera de Caudiel	Manzanilla de Caudiel@Morruda de Segorbe	37.7996	0	0	0	dG2	G1	FC stigmatic group deduced	0.241913	0.638713	0.119373	ADMIX	WM	0.238477	0.360796	0.400727	ADMIX	WM	0.0637862	0.513711	0.422503	ADMIX	WM
Derdi	Bouricha@Gordal Sevillana	28.8085	0	E3.3	E1.2	dG2	G1	FC stigmatic group deduced	0.0459561	0.349948	0.604096	ADMIX	CM	9.9991e-05	0.996634	0.00326623	B	CM	0.447061	0.108445	0.444494	ADMIX	WM
Desconocida de Fuente Santa	Negro del Carpio@Picual	23.2922	0	0	E1.1	dG1	G2	FC stigmatic group deduced	0.419773	0.203208	0.377019	ADMIX	WM	0.000424829	0.00694692	0.992628	C	WM	0.0371273	9.9991e-05	0.962773	C	WM
Desconocida-1481	Gordal Sevillana@Lechín de Granada	24.9802	0	E1.2	E1.1	G1	dG2	SC stigmatic group deduced	0.141227	9.9991e-05	0.858673	C	WM	0.447061	0.108445	0.444494	ADMIX	WM	0.189028	0.717782	0.0931903	ADMIX	WM
Desconocido de Arnedo	Redondilla de Logroño@Empeltre	20.1177	0	0	E1.1	dG2	G1	FC stigmatic group deduced	0.595414	0.324592	0.0799937	ADMIX	WM	0.495535	9.9991e-05	0.504365	ADMIX	WM	0.364114	0.479053	0.156833	ADMIX	WM
Desconocido de Calahorra	Redondilla de Logroño@Empeltre	21.0492	0	0	E1.1	dG2	G1	FC stigmatic group deduced	0.322936	0.320033	0.357031	ADMIX	WM	0.495535	9.9991e-05	0.504365	ADMIX	WM	0.364114	0.479053	0.156833	ADMIX	WM
Desconocido de Clavijo_3	Toffehi Tataouine@Gordal Sevillana	21.2805	0	dE1.1	E1.2	dG2	G1	FC chlorotype deduced from other trios. Stigmatic group deduced	0.545912	9.9991e-05	0.453988	ADMIX	WM	0.774554	0.225346	9.9991e-05	A	CM	0.447061	0.108445	0.444494	ADMIX	WM
Desconocido de Clavijo_4	Toffehi Tataouine@Gordal Sevillana	23.4999	0	dE1.1	E1.2	dG2	G1	FC chlorotype deduced from other trios. Stigmatic group deduced	0.552751	0.0251758	0.422073	ADMIX	WM	0.774554	0.225346	9.9991e-05	A	CM	0.447061	0.108445	0.444494	ADMIX	WM
Desconocido de Cornago	Royal de Calatayud@Picalaceña de Cornago	36.0692	0	0	0	dG1	dG2	Stigmatic group of both parents deduced from other trios	0.759755	0.217687	0.0225587	A	WM	0.41177	0.00385633	0.584374	ADMIX	WM	0.458684	9.9991e-05	0.541216	ADMIX	WM
Desconocido de Écija	Arbequina@Picual	24.3371	dE1.1	E1.1	E1.1	G1	G2	Off chlorotype deduced according to parents chlorotype information	0.414481	0.357716	0.227804	ADMIX	WM	0.354721	0.611333	0.0339462	ADMIX	WM	0.0371273	9.9991e-05	0.962773	C	WM
Desconocido de La Carolina	Galega Vulgar@Picual	33.6243	0	E1.2	E1.1	dG1	G2	FC stigmatic group deduced	0.187929	0.279819	0.532252	ADMIX	WM	9.9991e-05	0.208032	0.791868	C	WM	0.0371273	9.9991e-05	0.962773	C	WM
Desconocido de la Machuca	Gordal Sevillana@Lechín de Granada	23.4663	0	E1.2	E1.1	G1	dG2	SC stigmatic group deduced	0.0860403	9.9991e-05	0.91386	C	WM	0.447061	0.108445	0.444494	ADMIX	WM	0.189028	0.717782	0.0931903	ADMIX	WM
Desconocido de Prado Pitisco	Manzanilla Cacereña@Madural de Mallorca	29.1888	0	E1.1	0	G2	dG1	SC stigmatic group deduced	0.215643	0.205835	0.578522	ADMIX	WM	9.999e-05	9.999e-05	0.9998	C	WM	9.9991e-05	0.0137048	0.986195	C	WM
Desconocido de Quel-2021	Redondilla de Logroño@Empeltre	27.4277	0	0	E1.1	dG2	G1	FC stigmatic group deduced	0.57403	0.405	0.0209704	ADMIX	WM	0.495535	9.9991e-05	0.504365	ADMIX	WM	0.364114	0.479053	0.156833	ADMIX	WM
Desconocido de Quel-2026	Redondilla de Logroño@Empeltre	24.6795	0	0	E1.1	dG2	G1	FC stigmatic group deduced	0.493285	0.186078	0.320637	ADMIX	WM	0.495535	9.9991e-05	0.504365	ADMIX	WM	0.364114	0.479053	0.156833	ADMIX	WM
Desconocido de Santa Fe	Gordal Sevillana@Lechín de Granada	27.2292	0	E1.2	E1.1	G1	dG2	SC stigmatic group deduced	9.999e-05	9.999e-05	0.9998	C	WM	0.447061	0.108445	0.444494	ADMIX	WM	0.189028	0.717782	0.0931903	ADMIX	WM
Desconocido de Sojuela_1	Toffehi Tataouine@Gordal Sevillana	29.1708	0	dE1.1	E1.2	dG2	G1	FC chlorotype deduced from other trios. Stigmatic group deduced	0.391501	0.00421419	0.604285	ADMIX	WM	0.774554	0.225346	9.9991e-05	A	CM	0.447061	0.108445	0.444494	ADMIX	WM
Desconocido de Toledo_2	Gordal Sevillana@Lechín de Granada	23.9889	0	E1.2	E1.1	G1	dG2	SC stigmatic group deduced	0.034178	9.9991e-05	0.965722	C	WM	0.447061	0.108445	0.444494	ADMIX	WM	0.189028	0.717782	0.0931903	ADMIX	WM
Desconocido de Tudelilla	Royal de Calatayud@Arroniz	29.507	0	0	0	dG1	dG2	Stigmatic group of both parents deduced from other trios	0.502705	0.221065	0.27623	ADMIX	WM	0.41177	0.00385633	0.584374	ADMIX	WM	0.418488	9.9991e-05	0.581412	ADMIX	WM
Desconocido de Villamediana_2	Empeltre@Arroniz	27.4749	0	E1.1	0	G1	dG2	SC stigmatic group deduced	0.411443	0.177594	0.410962	ADMIX	WM	0.364114	0.479053	0.156833	ADMIX	WM	0.418488	9.9991e-05	0.581412	ADMIX	WM
Desconocido del cortijo de Don Pedro	Lechín de Sevilla@Manzanilla del Piquito	31.0104	0	E2.3	0	G1	dG2	SC stigmatic group deduced	0.0421934	0.275418	0.682388	ADMIX	WM	0.0311884	0.33841	0.630402	ADMIX	WM	9.999e-05	9.999e-05	0.9998	C	WM
Dhokkar Nafti	Jeddari Chaal@Olivastra Seggianese	27.9635	0	0	E1.1	dG2	dG1	Stigmatic group of both parents deduced from other trios	9.999e-05	0.9998	9.999e-05	B	CM	9.999e-05	0.9998	9.999e-05	B	CM	9.9991e-05	0.857491	0.142409	B	CM
Djabali Kini	Zaity@Saifi	42.3606	E1.2	E1.2	0	dG1	dG2	Stigmatic group of both parents deduced from other trios	0.754675	0.0667613	0.178563	A	EM	0.952956	0.0364355	0.0106081	A	EM	0.717684	0.020418	0.261898	ADMIX	EM
Dolce	Chemlali Sfax@Balady	25.6969	E1.1	E1.1	E1.2	dG1	dG2	FC deduced as mother according to chlorotype information. Stigmatic group of both parents deduced from other trios	0.268736	0.293199	0.438064	ADMIX	EM	9.999e-05	0.9998	9.999e-05	B	CM	0.734551	0.149336	0.116112	ADMIX	EM
Domat	Gaydoyrelia@Ayvalik	38.3358	E1.1	E1.1	E1.1	dG1	dG2	Stigmatic group of both parents deduced from other trios	0.810037	0.140891	0.0490724	A	EM	0.73515	0.0973181	0.167532	ADMIX	CM	0.760587	0.173913	0.0654999	A	EM
Domengues	Toffehi Tataouine@Safrawi	40.528	dE1.1	dE1.1	E1.1	dG2	G1	Off chlorotype deduced according to parents chlorotype information. FC chlorotype deduced from other trios. FC stigmatic group deduced	0.966306	0.033594	9.9991e-05	A	WM	0.774554	0.225346	9.9991e-05	A	CM	0.9998	9.999e-05	9.999e-05	A	EM
Dulzal de Carmona	Gordal Sevillana@Lechín de Granada	26.6186	E1.1	E1.2	E1.1	G1	dG2	SC deduced as mother according to chlorotype information. SC stigmatic group deduced	9.9991e-05	0.0920483	0.907852	C	WM	0.447061	0.108445	0.444494	ADMIX	WM	0.189028	0.717782	0.0931903	ADMIX	WM
Dwarf D	Uovo di Piccione@Picholine Marocaine	30.0365	dE1.1	E1.1	E1.1	dG1	G2	Off chlorotype deduced according to parents chlorotype information. FC stigmatic group deduced	0.323508	9.9991e-05	0.676392	ADMIX	WM	0.57191	9.9991e-05	0.42799	ADMIX	CM	9.999e-05	9.999e-05	0.9998	C	WM
El Salam	Toffahi@Chemlali Sfax	30.7844	E1.1	E1.2	E1.1	dG2	dG1	SC deduced as mother according to chlorotype information. Stigmatic group of both parents deduced from other trios	0.283788	0.297495	0.418717	ADMIX	EM	0.71625	0.198954	0.0847953	ADMIX	EM	9.999e-05	0.9998	9.999e-05	B	CM
Empeltre	Safrawi@Aimel	19.0245	E1.1	E1.1	E1.1	G1	dG2	SC stigmatic group deduced	0.364114	0.479053	0.156833	ADMIX	WM	0.9998	9.999e-05	9.999e-05	A	EM	9.9991e-05	0.913549	0.0863512	B	CM
Escarabajo	Gordal Sevillana@Lechín de Granada	24.1274	0	E1.2	E1.1	G1	dG2	SC stigmatic group deduced	9.999e-05	9.999e-05	0.9998	C	WM	0.447061	0.108445	0.444494	ADMIX	WM	0.189028	0.717782	0.0931903	ADMIX	WM
Faresana	Gordal Sevillana@San Francesco	22.5629	0	E1.2	E1.1	G1	dG2	SC stigmatic group deduced	0.298334	0.204103	0.497563	ADMIX	CM	0.447061	0.108445	0.444494	ADMIX	WM	0.254546	0.245882	0.499572	ADMIX	CM
Farga	Safrawi@Patrón de Cabús	28.612	E3.1	E1.1	dE3.1	G1	dG2; ANDROEST	Chlorotype of SC deduced according to chlorotype and androesterility information. SC stigmatic group deduced	0.324548	0.503034	0.172418	ADMIX	WM	0.9998	9.999e-05	9.999e-05	A	EM	0.0851482	0.885705	0.0291463	B	WM
Fasolona	Faresana@Fasolina	33.3181	E1.1	0	0	#N/A	#N/A		0.300029	0.245961	0.454009	ADMIX	CM	0.298334	0.204103	0.497563	ADMIX	CM	0.283186	0.525057	0.191757	ADMIX	CM
Favolosa	Frantoio@Ascolana Tenera	43.3184	dE1.1	E1.1	E1.1	G1	dG2	Off chlorotype deduced according to parents chlorotype information. SC stigmatic group deduced	0.400332	0.269756	0.329912	ADMIX	CM	0.129238	0.870662	9.9991e-05	B	CM	0.585557	0.0209258	0.393517	ADMIX	CM
Fontllonga	Claramunt@Verdal del Pallars	30.1835	0	0	0	G1	dG2	SC stigmatic group deduced	0.888171	0.103819	0.0080101	A	WM	0.938353	0.0615473	9.9991e-05	A	WM	0.613022	9.9991e-05	0.386878	ADMIX	WM
Fouji Asli Gafsa	Jemri Bouchouka@Nocellara del Belice	32.7567	dE1.1	E1.1	E1.1	G1	G2	Off chlorotype deduced according to parents chlorotype information	0.83156	0.16834	9.9991e-05	A	CM	0.809987	0.132483	0.0575298	A	CM	0.628682	9.9991e-05	0.371218	ADMIX	CM
Fram	Toffehi Tataouine@Safrawi	38.0249	dE1.1	dE1.1	E1.1	dG2	G1	Off chlorotype deduced according to parents chlorotype information. FC chlorotype deduced from other trios. FC stigmatic group deduced	0.926958	0.0729421	9.9991e-05	A	CM	0.774554	0.225346	9.9991e-05	A	CM	0.9998	9.999e-05	9.999e-05	A	EM
Gemlik	Sati@Samsun Tuzlamalik	39.0394	E1.1	0	0	#N/A	#N/A		0.735716	9.9991e-05	0.264184	ADMIX	EM	0.567008	9.9991e-05	0.432892	ADMIX	EM	0.589138	9.9991e-05	0.410762	ADMIX	EM
Gerboui	Safrawi@Nocellara del Belice	27.7357	E1.1	E1.1	E1.1	G1	G2		0.914318	9.9991e-05	0.085582	A	CM	0.9998	9.999e-05	9.999e-05	A	EM	0.628682	9.9991e-05	0.371218	ADMIX	CM
Gileta	Lechín de Sevilla@Villalonga	28.9392	0	E2.3	E1.3	G1	dG2	SC stigmatic group deduced	0.431012	0.245694	0.323295	ADMIX	WM	0.0311884	0.33841	0.630402	ADMIX	WM	0.550961	0.226273	0.222766	ADMIX	WM
Gorda Limoncillo	Gordal Sevillana@Lechín de Granada	23.4158	0	E1.2	E1.1	G1	dG2	SC stigmatic group deduced	9.9991e-05	0.0449192	0.954981	C	WM	0.447061	0.108445	0.444494	ADMIX	WM	0.189028	0.717782	0.0931903	ADMIX	WM
Gordal de Vélez Rubio	Verdala@Lechín de Granada	20.8528	dE1.1	E1.1	E1.1	dG1	dG2	Off chlorotype deduced according to parents chlorotype information. Stigmatic group of both parents deduced from other trios	0.0895727	0.350484	0.559943	ADMIX	WM	9.999e-05	9.999e-05	0.9998	C	WM	0.189028	0.717782	0.0931903	ADMIX	WM
Grassois	Frantoio@Araban	41.3065	E1.1	E1.1	E1.1	G1	dG2	SC stigmatic group deduced	0.129491	0.690754	0.179755	ADMIX	WM	0.129238	0.870662	9.9991e-05	B	CM	0.386276	0.257965	0.355759	ADMIX	WM
Grosal de Cieza	Gordal Sevillana@Lechín de Granada	21.4201	0	E1.2	E1.1	G1	dG2	SC stigmatic group deduced	0.0454409	0.00731625	0.947243	C	WM	0.447061	0.108445	0.444494	ADMIX	WM	0.189028	0.717782	0.0931903	ADMIX	WM
Grosal Vimbodí	Arbequina@Verdal del Pallars	32.8344	0	E1.1	0	G1	dG2	SC stigmatic group deduced	0.767085	0.232815	9.9991e-05	A	WM	0.354721	0.611333	0.0339462	ADMIX	WM	0.613022	9.9991e-05	0.386878	ADMIX	WM
Grossal de Bovera	Safrawi@Ayvalik	30.614	dE1.1	E1.1	E1.1	G1	dG2	Off chlorotype deduced according to parents chlorotype information. SC stigmatic group deduced	0.9998	9.999e-05	9.999e-05	A	WM	0.9998	9.999e-05	9.999e-05	A	EM	0.760587	0.173913	0.0654999	A	EM
Grossanne	Toffehi Tataouine@Gordal Sevillana	25.4965	E1.1	dE1.1	E1.2	dG2	G1	FC chlorotype deduced. FC deduced as mother according to chlorotype information. FC stigmatic group deduced	0.574771	9.9991e-05	0.425129	ADMIX	WM	0.774554	0.225346	9.9991e-05	A	CM	0.447061	0.108445	0.444494	ADMIX	WM
Humaisi	Zaity@Baladi	34.7168	0	E1.2	E1.1	dG1	G2	FC stigmatic group deduced	0.918696	9.9991e-05	0.0812045	A	EM	0.952956	0.0364355	0.0106081	A	EM	0.839484	0.0215472	0.138969	A	EM
Ifiri	Bouchouk Lafayette@Chemlal de Kabylie	27.9459	dE3.2	E1.1	E3.2	#N/A	Androesterility	offspring chlorotype deduced according to chlorotype and androsterility informations of candidate parents	0.21054	0.482475	0.306985	ADMIX	CM	0.622242	9.9991e-05	0.377658	ADMIX	CM	9.9991e-05	0.641352	0.358548	ADMIX	CM
Iliturgitana	Koroneiki@Ascolana Tenera	28.1244	dE1.1	E1.1	E1.1	G1	dG2	Off chlorotype deduced according to parents chlorotype information. SC stigmatic group deduced	0.25078	0.288572	0.460649	ADMIX	WM	0.0933616	0.865568	0.0410706	B	CM	0.585557	0.0209258	0.393517	ADMIX	CM
Injassi Gafsa	Jemri Bouchouka@Nocellara del Belice	38.8058	dE1.1	E1.1	E1.1	G1	G2	Off chlorotype deduced according to parents chlorotype information	0.745595	0.254305	9.9991e-05	ADMIX	CM	0.809987	0.132483	0.0575298	A	CM	0.628682	9.9991e-05	0.371218	ADMIX	CM
Izmir Sofralik	Gordal Sevillana@Memeli	37.9376	E1.1	E1.2	0	G1	dG2	SC stigmatic group deduced	0.743034	9.9991e-05	0.256866	ADMIX	EM	0.447061	0.108445	0.444494	ADMIX	WM	0.98724	0.0126596	9.9991e-05	A	EM
Janude_1	Zaity@Idleb	36.111	E1.2	E1.2	E1.2	dG1	dG2	Stigmatic group of both parents deduced from other trios	0.711136	0.115711	0.173153	ADMIX	EM	0.952956	0.0364355	0.0106081	A	EM	0.733971	0.196051	0.069978	ADMIX	EM
Jaropo	Gordal Sevillana@Lechín de Granada	23.5449	E1.1	E1.2	E1.1	G1	dG2	SC deduced as mother according to chlorotype information. SC stigmatic group deduced	9.9991e-05	0.167834	0.832066	C	WM	0.447061	0.108445	0.444494	ADMIX	WM	0.189028	0.717782	0.0931903	ADMIX	WM
Jemri Bouchouka	Toffehi Tataouine@Chemlali Sig	21.5367	E1.1	dE1.1	0	dG2	dG1	FC chlorotype deduced from other trios. Stigmatic group of both parents deduced from other trios	0.809987	0.132483	0.0575298	A	CM	0.774554	0.225346	9.9991e-05	A	CM	0.0395874	0.611504	0.348909	ADMIX	CM
Jlot	Tarabelsi@Mawi	50.3595	E1.1	0	E1.2; E1	#N/A	#N/A		0.9998	9.999e-05	9.999e-05	A	EM	0.996249	0.00365089	9.9991e-05	A	EM	0.824242	0.0770336	0.0987243	A	EM
Jlot-841	Mahati-846@Jlot	58.1388	0	0	E1.1	dG2	dG1	Stigmatic group of both parents deduced from other trios	0.958566	0.0413336	9.9991e-05	A	EM	0.9998	9.999e-05	9.999e-05	A	EM	0.9998	9.999e-05	9.999e-05	A	EM
Kan Celebi	Halhali Celebi@Yag Celebi (Tatayn)	28.7704	E1.2	0	0	#N/A	#N/A		0.854508	0.145392	9.9991e-05	A	EM	0.720597	0.279303	9.9991e-05	ADMIX	EM	0.741415	0.0424036	0.216182	ADMIX	EM
Karamani-1564	Zaity@Baladi	42.0251	0	E1.2	E1.1	dG1	G2	FC stigmatic group deduced	0.825199	9.9991e-05	0.174701	A	EM	0.952956	0.0364355	0.0106081	A	EM	0.839484	0.0215472	0.138969	A	EM
Karbunčela	Gordal Sevillana@Morchiaio	23.987	E1.1	E1.2	E1.1	G1	G2	SC deduced as mother according to chlorotype information	0.54412	9.9991e-05	0.45578	ADMIX	CM	0.447061	0.108445	0.444494	ADMIX	WM	0.384608	0.448984	0.166408	ADMIX	CM
Karme	Zaity@Saifi	40.8674	E1.1	E1.2	0	dG1	dG2	Stigmatic group of both parents deduced from other trios	0.72681	0.118131	0.15506	ADMIX	EM	0.952956	0.0364355	0.0106081	A	EM	0.717684	0.020418	0.261898	ADMIX	EM
Karydolia	Safrawi@Amygdalolia Nana	33.9452	E1.1	E1.1	E1.2	G1	G2	FC deduced as mother according to chlorotype information	0.94087	0.04993	0.00920002	A	CM	0.9998	9.999e-05	9.999e-05	A	EM	0.571017	9.9991e-05	0.428883	ADMIX	CM
Kato Drys	Jlot@Baladi	53.4748	E1.1	E1.1	E1.1	dG1	G2	FC stigmatic group deduced	0.950888	9.9991e-05	0.0490122	A	EM	0.9998	9.999e-05	9.999e-05	A	EM	0.839484	0.0215472	0.138969	A	EM
Kerdi	Zaity@Baladi	43.814	E1.2	E1.2	E1.1	dG1	G2	FC deduced as mother according to chlorotype information. FC stigmatic group deduced	0.932263	0.0676373	9.9991e-05	A	EM	0.952956	0.0364355	0.0106081	A	EM	0.839484	0.0215472	0.138969	A	EM
Khalkhali	Zaity@Baladi	48.0468	E1.2	E1.2	E1.1	dG1	G2	FC deduced as mother according to chlorotype information. FC stigmatic group deduced	0.986882	9.9991e-05	0.0130182	A	EM	0.952956	0.0364355	0.0106081	A	EM	0.839484	0.0215472	0.138969	A	EM
Khalkhali-1595	Zaity@Baladi	38.788	0	E1.2	E1.1	dG1	G2	FC stigmatic group deduced	0.947898	0.00274268	0.0493593	A	EM	0.952956	0.0364355	0.0106081	A	EM	0.839484	0.0215472	0.138969	A	EM
Khuokhe	Saifi@Safrawi	35.5293	E1.2; E1.1	0	E1.1	dG2	G1	FC stigmatic group deduced	0.886842	0.113058	9.9991e-05	A	EM	0.717684	0.020418	0.261898	ADMIX	EM	0.9998	9.999e-05	9.999e-05	A	EM
Killin	Zaity@Saifi	41.1812	E1.2	E1.2	0	dG1	dG2	Stigmatic group of both parents deduced from other trios	0.813943	0.0136801	0.172377	A	EM	0.952956	0.0364355	0.0106081	A	EM	0.717684	0.020418	0.261898	ADMIX	EM
Kokerrmadh Elbasani	Toffehi Tataouine@Safrawi	27.5722	dE1.1	dE1.1	E1.1	dG2	G1	Off chlorotype deduced according to parents chlorotype information. FC chlorotype deduced from other trios. FC stigmatic group deduced	0.880554	0.119346	9.9991e-05	A	CM	0.774554	0.225346	9.9991e-05	A	CM	0.9998	9.999e-05	9.999e-05	A	EM
Kosiem	Manzanilla de Sevilla@Chemlali Sfax	21.7838	E1.1	E1.1	E1.1	G2	dG1	SC stigmatic group deduced	0.349468	0.285911	0.364621	ADMIX	EM	9.9991e-05	0.0142218	0.985678	C	WM	9.999e-05	0.9998	9.999e-05	B	CM
Kothreiki	Toffehi Tataouine@Safrawi	39.3588	E1.1	dE1.1	E1.1	dG2	G1	FC chlorotype deduced from other trios. Stigmatic group deduced	0.9998	9.999e-05	9.999e-05	A	CM	0.774554	0.225346	9.9991e-05	A	CM	0.9998	9.999e-05	9.999e-05	A	EM
Kotruvsi	Toffehi Tataouine@Safrawi	41.7591	dE1.1	dE1.1	E1.1	dG2	G1	Off chlorotype deduced according to parents chlorotype information. FC chlorotype deduced from other trios. FC stigmatic group deduced	0.880004	0.119896	9.9991e-05	A	CM	0.774554	0.225346	9.9991e-05	A	CM	0.9998	9.999e-05	9.999e-05	A	EM
Larga Rambleña	Lechín de Sevilla@Picudo	21.6069	0	E2.3	E1.1	G1	G2		0.223313	0.344663	0.432024	ADMIX	WM	0.0311884	0.33841	0.630402	ADMIX	WM	0.00790775	9.9991e-05	0.991992	C	WM
Leccino	Frantoio@Manakiri	35.1293	E1.1	E1.1	E1.2	G1	dG2	FC deduced as mother according to chlorotype information. SC stigmatic group deduced	0.3057	0.619	0.0753007	ADMIX	CM	0.129238	0.870662	9.9991e-05	B	CM	0.405567	0.245813	0.348619	ADMIX	EM
Lentisca	Galega Vulgar@Bical	34.8643	E1.1	E1.2	E1.1	dG1	dG2	SC deduced as mother according to chlorotype information. Stigmatic group of both parents deduced from other trios	0.263057	0.182012	0.554931	ADMIX	WM	9.9991e-05	0.208032	0.791868	C	WM	0.0977338	0.0218558	0.88041	C	WM
Lianolia Kerkyras	Semni Djebeniana@Pikrolia	31.7501	E2.2	0	E2.2	#N/A	#N/A		9.9991e-05	0.906993	0.0929067	B	CM	9.999e-05	0.9998	9.999e-05	B	CM	0.19503	0.424921	0.380049	ADMIX	CM
Lumbardina	Ulliri i Bardhe i Tiranes@Morchiaio	32.3143	dE1.1	E1.1	E1.1	dG1	G2	Off chlorotype deduced according to parents chlorotype information. FC stigmatic group deduced	0.408957	0.391251	0.199792	ADMIX	CM	0.84512	0.15478	9.9991e-05	A	CM	0.384608	0.448984	0.166408	ADMIX	CM
Maarri	Zaity@Baladi	38.2671	E1.1	E1.2	E1.1	dG1	G2	SC deduced as mother according to chlorotype information. FC stigmatic group deduced	0.94918	9.9991e-05	0.0507204	A	EM	0.952956	0.0364355	0.0106081	A	EM	0.839484	0.0215472	0.138969	A	EM
Machazo de Ribafrecha	Toffehi Tataouine@Gordal Sevillana	30.5889	0	dE1.1	E1.2	dG2	G1	FC chlorotype deduced from other trios. Stigmatic group deduced	0.358805	9.9991e-05	0.641095	ADMIX	WM	0.774554	0.225346	9.9991e-05	A	CM	0.447061	0.108445	0.444494	ADMIX	WM
Macho de Galilea	Arroniz@Bolvino	36.1697	0	0	E1.1	dG2	dG1	Stigmatic group of both parents deduced from other trios	0.793919	9.9991e-05	0.205981	A	WM	0.418488	9.9991e-05	0.581412	ADMIX	WM	0.984537	9.9991e-05	0.0153634	A	WM
Macho de Jaén	Gordal Sevillana@Lechín de Granada	26.3989	0	E1.2	E1.1	G1	dG2	SC stigmatic group deduced	0.0160756	9.9991e-05	0.983824	C	WM	0.447061	0.108445	0.444494	ADMIX	WM	0.189028	0.717782	0.0931903	ADMIX	WM
Madonna dell'Impruneta	Moraiolo@Morchiaio	23.991	E1.1	E1.1	E1.1	G1	G2		0.431872	0.420537	0.147591	ADMIX	CM	0.39852	0.535794	0.0656857	ADMIX	CM	0.384608	0.448984	0.166408	ADMIX	CM
Madural de Mallorca	Gordal Sevillana@Lechín de Granada	28.6091	0	E1.2	E1.1	G1	dG2	SC stigmatic group deduced	9.9991e-05	0.0137048	0.986195	C	WM	0.447061	0.108445	0.444494	ADMIX	WM	0.189028	0.717782	0.0931903	ADMIX	WM
Mahati-1010	Saifi@Safrawi	34.189	0	0	E1.1	dG2	G1	FC stigmatic group deduced	0.903723	0.0734384	0.0228388	A	EM	0.717684	0.020418	0.261898	ADMIX	EM	0.9998	9.999e-05	9.999e-05	A	EM
Majhol-1059	Zaity@Baladi	45.7155	0	E1.2	E1.1	dG1	G2	FC stigmatic group deduced	0.838917	9.9991e-05	0.160983	A	EM	0.952956	0.0364355	0.0106081	A	EM	0.839484	0.0215472	0.138969	A	EM
Managjel	Ulliri i Bardhe i Tiranes@Ogliarola del Bradano	34.0056	dE1.1	E1.1	E1.1	dG1	dG2	Off chlorotype deduced according to parents chlorotype information. Stigmatic group of both parents deduced from other trios	0.597604	0.402296	9.9991e-05	ADMIX	CM	0.84512	0.15478	9.9991e-05	A	CM	9.9991e-05	0.854337	0.145563	B	CM
Mançanal d'Arnes	Toffehi Tataouine@Gordal Sevillana	28.0903	0	dE1.1	E1.2	dG2	G1	FC chlorotype deduced from other trios. Stigmatic group deduced	0.41638	9.9991e-05	0.58352	ADMIX	WM	0.774554	0.225346	9.9991e-05	A	CM	0.447061	0.108445	0.444494	ADMIX	WM
Manzanella del Mezquin	Toffehi Tataouine@Safrawi	38.2743	dE1.1	dE1.1	E1.1	dG2	G1	Off chlorotype deduced according to parents chlorotype information. FC chlorotype deduced from other trios. FC stigmatic group deduced	0.875188	0.124712	9.9991e-05	A	WM	0.774554	0.225346	9.9991e-05	A	CM	0.9998	9.999e-05	9.999e-05	A	EM
Manzanilla Cacereña	Gordal Sevillana@Lechín de Granada	25.1543	E1.1	E1.2	E1.1	G1	dG2	SC deduced as mother according to chlorotype information. SC stigmatic group deduced	9.999e-05	9.999e-05	0.9998	C	WM	0.447061	0.108445	0.444494	ADMIX	WM	0.189028	0.717782	0.0931903	ADMIX	WM
Manzanilla de Alfarnatejo	Gordal Sevillana@Lechín de Granada	26.4698	0	E1.2	E1.1	G1	dG2	SC stigmatic group deduced	9.999e-05	9.999e-05	0.9998	C	WM	0.447061	0.108445	0.444494	ADMIX	WM	0.189028	0.717782	0.0931903	ADMIX	WM
Manzanilla de Montefrío	Gordal Sevillana@Lechín de Granada	25.2082	E1.1	E1.2	E1.1	G1	dG2	SC deduced as mother according to chlorotype information. SC stigmatic group deduced	9.999e-05	9.999e-05	0.9998	C	WM	0.447061	0.108445	0.444494	ADMIX	WM	0.189028	0.717782	0.0931903	ADMIX	WM
Manzanilla de Sevilla	Gordal Sevillana@Lechín de Granada	25.1348	E1.1	E1.2	E1.1	G1	dG2	SC deduced as mother according to chlorotype information. SC stigmatic group deduced	9.9991e-05	0.0142218	0.985678	C	WM	0.447061	0.108445	0.444494	ADMIX	WM	0.189028	0.717782	0.0931903	ADMIX	WM
Manzanilla del Piquito	Gordal Sevillana@Lechín de Granada	25.6419	0	E1.2	E1.1	G1	dG2	SC stigmatic group deduced	9.999e-05	9.999e-05	0.9998	C	WM	0.447061	0.108445	0.444494	ADMIX	WM	0.189028	0.717782	0.0931903	ADMIX	WM
Martina	Arbequina@Picual	19.65	dE1.1	E1.1	E1.1	G1	G2	Off chlorotype deduced according to parents chlorotype information	0.578252	0.223337	0.198411	ADMIX	WM	0.354721	0.611333	0.0339462	ADMIX	WM	0.0371273	9.9991e-05	0.962773	C	WM
Mawi	Jlot@Shami Modabl	47.7154	E1.2; E1	E1.1	E1.1	dG1	dG2	Stigmatic group of both parents deduced from other trios	0.824242	0.0770336	0.0987243	A	EM	0.9998	9.999e-05	9.999e-05	A	EM	0.828471	0.171429	9.9991e-05	A	EM
Memeli	Safrawi@Amygdalolia Nana	31.1692	0	E1.1	E1.2	G1	G2		0.98724	0.0126596	9.9991e-05	A	EM	0.9998	9.999e-05	9.999e-05	A	EM	0.571017	9.9991e-05	0.428883	ADMIX	CM
Meski	Safrawi@Abunara	29.5357	E1.1	E1.1	E1.2	G1	dG2	FC deduced as mother according to chlorotype information. SC stigmatic group deduced	0.84662	9.9991e-05	0.15328	A	CM	0.9998	9.999e-05	9.999e-05	A	EM	0.45323	9.9991e-05	0.54667	ADMIX	CM
Meskyet Dawla Gafsa	Jemri Bouchouka@Nocellara del Belice	34.231	dE1.1	E1.1	E1.1	G1	G2	Off chlorotype deduced according to parents chlorotype information	0.770926	0.228974	9.9991e-05	A	CM	0.809987	0.132483	0.0575298	A	CM	0.628682	9.9991e-05	0.371218	ADMIX	CM
Mignolo Cerretano	Chemlali Zarzis@Unafka	19.6103	E1.1	0	0	dG2	dG1	Stigmatic group of both parents deduced from other trios	0.0540454	0.775001	0.170954	B	CM	9.9991e-05	0.947087	0.0528128	B	CM	0.246675	0.194937	0.558388	ADMIX	CM
Miquel Vilaseca	Morrut@Arbequina	36.8206	dE1.1	E1.1	E1.1	G2	G1	Off chlorotype deduced according to parents chlorotype information	0.519808	0.480092	9.9991e-05	ADMIX	WM	0.563763	0.370531	0.0657057	ADMIX	WM	0.354721	0.611333	0.0339462	ADMIX	WM
Morruda de Segorbe	Jeddari Chaal@Royal de Calatayud	22.1761	0	0	0	dG2	dG1	Stigmatic group of both parents deduced from other trios	0.0637862	0.513711	0.422503	ADMIX	WM	9.999e-05	0.9998	9.999e-05	B	CM	0.41177	0.00385633	0.584374	ADMIX	WM
Morrut-607	Gordal Sevillana@Lechín de Granada	25.1822	0	E1.2	E1.1	G1	dG2	SC stigmatic group deduced	0.109641	9.9991e-05	0.890259	C	WM	0.447061	0.108445	0.444494	ADMIX	WM	0.189028	0.717782	0.0931903	ADMIX	WM
Muixonenca de Torre d' Arques	Safrawi@Ayvalik	30.4093	dE1.1	E1.1	E1.1	G1	dG2	Off chlorotype deduced according to parents chlorotype information. SC stigmatic group deduced	0.864079	0.135821	9.9991e-05	A	WM	0.9998	9.999e-05	9.999e-05	A	EM	0.760587	0.173913	0.0654999	A	EM
Neb Tataouine	Dokkar@Nocellara del Belice	30.8671	0	E3	E1.1	dG1	G2	FC stigmatic group deduced	9.9991e-05	0.746727	0.253173	ADMIX	CM	9.999e-05	0.9998	9.999e-05	B	CM	0.628682	9.9991e-05	0.371218	ADMIX	CM
Negral de Bierge	Toffehi Tataouine@Safrawi	36.6123	dE1.1	dE1.1	E1.1	dG2	G1	Off chlorotype deduced according to parents chlorotype information. FC chlorotype deduced from other trios. FC stigmatic group deduced	0.996821	0.00307911	9.9991e-05	A	WM	0.774554	0.225346	9.9991e-05	A	CM	0.9998	9.999e-05	9.999e-05	A	EM
Negret	Llei del Bessó@Domengues	19.3583	0	0	0	#N/A	#N/A		9.9991e-05	0.891017	0.108883	B	WM	9.9991e-05	0.894745	0.105155	B	WM	0.966306	0.033594	9.9991e-05	A	WM
Negrilla de Cortijo Fraile	Manzanilla Cacereña@Dokkar	22.6154	0	E1.1	E3	G2	dG1	SC stigmatic group deduced	0.0177319	0.496317	0.485951	ADMIX	WM	9.999e-05	9.999e-05	0.9998	C	WM	9.999e-05	0.9998	9.999e-05	B	CM
Negrillo de Ausejo	Picalaceña de Cornago@Bodoquera	35.893	0	0	0	dG2	dG1	Stigmatic group of both parents deduced from other trios	0.712041	9.9991e-05	0.287859	ADMIX	WM	0.458684	9.9991e-05	0.541216	ADMIX	WM	0.513583	9.9991e-05	0.486317	ADMIX	WM
Negrillo Redondo	Gordal Sevillana@Lechín de Granada	22.1964	E1.1	E1.2	E1.1	G1	dG2	SC deduced as mother according to chlorotype information. SC stigmatic group deduced	0.123477	9.9991e-05	0.876423	C	WM	0.447061	0.108445	0.444494	ADMIX	WM	0.189028	0.717782	0.0931903	ADMIX	WM
Nevadillo de la Axarquía	Lechín de Granada@Olivo de Los Prados	24.4564	0	E1.1	0	dG2	dG1	Stigmatic group of both parents deduced from other trios	0.60475	0.272034	0.123215	ADMIX	WM	0.189028	0.717782	0.0931903	ADMIX	WM	0.50385	0.3648	0.13135	ADMIX	WM
Nevado Rizado	Gordal Sevillana@Lechín de Granada	24.8841	E1.1	E1.2	E1.1	G1	dG2	SC deduced as mother according to chlorotype information. SC stigmatic group deduced	9.999e-05	9.999e-05	0.9998	C	WM	0.447061	0.108445	0.444494	ADMIX	WM	0.189028	0.717782	0.0931903	ADMIX	WM
Nociara	Mignolo Cerretano@Oblica	17.9507	E1.1	E1.1	E1.1	dG1	dG2	Stigmatic group of both parents deduced from other trios	0.156407	0.488497	0.355096	ADMIX	CM	0.0540454	0.775001	0.170954	B	CM	0.391907	0.129828	0.478265	ADMIX	CM
Oblica	Gordal Sevillana@Morchiaio	27.3356	E1.1	E1.2	E1.1	G1	G2	SC deduced as mother according to chlorotype information	0.391907	0.129828	0.478265	ADMIX	CM	0.447061	0.108445	0.444494	ADMIX	WM	0.384608	0.448984	0.166408	ADMIX	CM
Ocal	Gordal Sevillana@Lechín de Granada	26.4091	E1.1	E1.2	E1.1	G1	dG2	SC deduced as mother according to chlorotype information. SC stigmatic group deduced	9.999e-05	9.999e-05	0.9998	C	WM	0.447061	0.108445	0.444494	ADMIX	WM	0.189028	0.717782	0.0931903	ADMIX	WM
Ocal de Alburquerque	Gordal Sevillana@Lechín de Granada	23.0103	0	E1.2	E1.1	G1	dG2	SC stigmatic group deduced	0.00142947	0.0299408	0.96863	C	WM	0.447061	0.108445	0.444494	ADMIX	WM	0.189028	0.717782	0.0931903	ADMIX	WM
Olivera d'Aransis	Claramunt@Verdal del Pallars	34.2277	0	0	0	G1	dG2	SC stigmatic group deduced	0.923036	0.0768645	9.9991e-05	A	WM	0.938353	0.0615473	9.9991e-05	A	WM	0.613022	9.9991e-05	0.386878	ADMIX	WM
Olivo de Clavijo_1	Toffehi Tataouine@Gordal Sevillana	25.3003	0	dE1.1	E1.2	dG2	G1	FC chlorotype deduced from other trios. Stigmatic group deduced	0.421585	9.9991e-05	0.578315	ADMIX	WM	0.774554	0.225346	9.9991e-05	A	CM	0.447061	0.108445	0.444494	ADMIX	WM
Olivo de Ibiza_1	Safrawi@Callosina	23.6724	dE1.1	E1.1	E1.1	G1	dG2	Off chlorotype deduced according to parents chlorotype information	0.605826	0.0151192	0.379054	ADMIX	WM	0.9998	9.999e-05	9.999e-05	A	EM	9.9991e-05	0.00210791	0.997792	C	WM
Olivo de Mallorca_1	Gordal Sevillana@Lechín de Granada	27.5314	0	E1.2	E1.1	G1	dG2	SC stigmatic group deduced	9.999e-05	9.999e-05	0.9998	C	WM	0.447061	0.108445	0.444494	ADMIX	WM	0.189028	0.717782	0.0931903	ADMIX	WM
Olivo de Maura	Genovesa@Lechín de Granada	24.7033	0	0	E1.1	dG1	dG2	Stigmatic group of both parents deduced from other trios	0.068752	0.35242	0.578827	ADMIX	WM	0.524185	0.104222	0.371593	ADMIX	WM	0.189028	0.717782	0.0931903	ADMIX	WM
Olivo de Órgiva	Safrawi@Lechín de Granada	21.409	dE1.1	E1.1	E1.1	G1	dG2	Off chlorotype deduced according to parents chlorotype information. SC stigmatic group deduced	0.460196	0.532482	0.00732202	ADMIX	WM	0.9998	9.999e-05	9.999e-05	A	EM	0.189028	0.717782	0.0931903	ADMIX	WM
Olivo de Santa Engracia	Toffehi Tataouine@Gordal Sevillana	28.4503	0	dE1.1	E1.2	dG2	G1	FC chlorotype deduced from other trios. Stigmatic group deduced	0.580218	9.9991e-05	0.419682	ADMIX	WM	0.774554	0.225346	9.9991e-05	A	CM	0.447061	0.108445	0.444494	ADMIX	WM
Olivo de Villamediana	Toffehi Tataouine@Gordal Sevillana	26.8246	0	dE1.1	E1.2	dG2	G1	FC chlorotype deduced from other trios. Stigmatic group deduced	0.49931	9.9991e-05	0.50059	ADMIX	WM	0.774554	0.225346	9.9991e-05	A	CM	0.447061	0.108445	0.444494	ADMIX	WM
Olivo del Mulino	Gordal Sevillana@Morchiaio	28.3767	E1.1	E1.2	E1.1	G1	G2	SC deduced as mother according to chlorotype information	0.442399	0.108962	0.448639	ADMIX	CM	0.447061	0.108445	0.444494	ADMIX	WM	0.384608	0.448984	0.166408	ADMIX	CM
Olivo di San Lorenzo	Frantoio@Mignolo	22.4713	E1.1	E1.1	E1.1	G1	G2		0.352208	0.448575	0.199217	ADMIX	CM	0.129238	0.870662	9.9991e-05	B	CM	0.0404795	0.53681	0.422711	ADMIX	CM
Olivoner	Safrawi@Ocal Cordobesa	22.1475	dE1.1	E1.1	E1.1	G1	G2	Off chlorotype deduced according to parents chlorotype information. SC stigmatic group deduced	0.744063	0.059355	0.196582	ADMIX	WM	0.9998	9.999e-05	9.999e-05	A	EM	0.270258	9.9991e-05	0.729642	ADMIX	WM
Ornellaia	Frantoio@Oblica	26.4829	E1.1	E1.1	E1.1	G1	dG2	SC stigmatic group deduced	0.279148	0.490241	0.230611	ADMIX	CM	0.129238	0.870662	9.9991e-05	B	CM	0.391907	0.129828	0.478265	ADMIX	CM
Panisello	Sevillenca@Picual	31.741	dE1.1	E1.1	E1.1	G1	G2	Off chlorotype deduced according to parents chlorotype information	0.264278	0.209278	0.526444	ADMIX	WM	0.301262	0.148917	0.549821	ADMIX	WM	0.0371273	9.9991e-05	0.962773	C	WM
Panseñera	Royeta de Asque@Domengues	38.9056	0	0	0	#N/A	#N/A		0.930027	0.0698734	9.9991e-05	A	WM	0.557154	0.442746	9.9991e-05	ADMIX	WM	0.966306	0.033594	9.9991e-05	A	WM
Passulunara	Biancolilla-1814@Tefah	17.7869	E1.1	0	E1.1	#N/A	#N/A		0.604925	9.9991e-05	0.394975	ADMIX	CM	0.606834	0.0769953	0.316171	ADMIX	WM	0.452914	9.9991e-05	0.546986	ADMIX	CM
Pavo	Gordal Sevillana@Lechín de Granada	26.6568	E1.1	E1.2	E1.1	G1	dG2	SC deduced as mother according to chlorotype information. SC stigmatic group deduced	9.999e-05	9.999e-05	0.9998	C	WM	0.447061	0.108445	0.444494	ADMIX	WM	0.189028	0.717782	0.0931903	ADMIX	WM
Perafort	Arbequina@Verdal del Pallars	32.2738	0	E1.1	0	G1	dG2	SC stigmatic group deduced	0.481828	0.230024	0.288148	ADMIX	WM	0.354721	0.611333	0.0339462	ADMIX	WM	0.613022	9.9991e-05	0.386878	ADMIX	WM
Picholine Marocaine	Gordal Sevillana@Lechín de Granada	24.456	E1.1	E1.2	E1.1	G1	dG2	SC deduced as mother according to chlorotype information. SC stigmatic group deduced	9.999e-05	9.999e-05	0.9998	C	WM	0.447061	0.108445	0.444494	ADMIX	WM	0.189028	0.717782	0.0931903	ADMIX	WM
Pico Limón	Gordal Sevillana@Lechín de Granada	26.8904	0	E1.2	E1.1	G1	dG2	SC stigmatic group deduced	9.999e-05	9.999e-05	0.9998	C	WM	0.447061	0.108445	0.444494	ADMIX	WM	0.189028	0.717782	0.0931903	ADMIX	WM
Pico Limón de Grazalema	Gordal Sevillana@Lechín de Granada	27.2437	E1.1	E1.2	E1.1	G1	dG2	SC deduced as mother according to chlorotype information. SC stigmatic group deduced	9.999e-05	9.999e-05	0.9998	C	WM	0.447061	0.108445	0.444494	ADMIX	WM	0.189028	0.717782	0.0931903	ADMIX	WM
Picual de Almería	Gordal Sevillana@Lechín de Granada	22.1444	0	E1.2	E1.1	G1	dG2	SC stigmatic group deduced	0.0276526	0.0220308	0.950317	C	WM	0.447061	0.108445	0.444494	ADMIX	WM	0.189028	0.717782	0.0931903	ADMIX	WM
Picuda de Luis	Farga@Argudell	22.7925	dE3.1	E3.1	E1.1	G1; ANDROEST	G2	Off chlorotype deduced according to parents chlorotype and androesterility information	0.361968	0.288613	0.349419	ADMIX	WM	0.324548	0.503034	0.172418	ADMIX	WM	0.271301	0.120361	0.608338	ADMIX	WM
Picudo Blanco de Estepa	Gordal Sevillana@Lechín de Granada	25.1641	0	E1.2	E1.1	G1	dG2	SC stigmatic group deduced	9.9991e-05	0.0188213	0.981079	C	WM	0.447061	0.108445	0.444494	ADMIX	WM	0.189028	0.717782	0.0931903	ADMIX	WM
Picudo de Labata	Toffehi Tataouine@Gordal Sevillana	27.9218	0	dE1.1	E1.2	dG2	G1	FC chlorotype deduced from other trios. Stigmatic group deduced	0.356632	9.9991e-05	0.643268	ADMIX	WM	0.774554	0.225346	9.9991e-05	A	CM	0.447061	0.108445	0.444494	ADMIX	WM
Pidicuddara	Chemlali Sfax@Nocellara del Belice	28.5817	E1.1	E1.1	E1.1	dG1	G2	FC stigmatic group deduced	0.603894	0.271706	0.1244	ADMIX	CM	9.999e-05	0.9998	9.999e-05	B	CM	0.628682	9.9991e-05	0.371218	ADMIX	CM
Pito	Morruda de Segorbe@Verdal de La Fatarella	28.5405	0	0	0	G1	dG2	SC stigmatic group deduced	0.413391	0.528062	0.0585477	ADMIX	WM	0.0637862	0.513711	0.422503	ADMIX	WM	0.652003	0.297773	0.050224	ADMIX	WM
Pizz'e Carroga	Moresca@Lumiaro	15.6862	E1.1	E1.1	E1.1	G1	dG2	SC stigmatic group deduced	0.494188	9.9991e-05	0.505712	ADMIX	CM	0.484904	0.0478246	0.467271	ADMIX	CM	0.493901	9.9991e-05	0.505999	ADMIX	CM
Polinizador	Lechín de Sevilla@Ascolana Tenera	29.4892	0	E2.3	E1.1	G1	dG2	SC stigmatic group deduced	0.472014	0.182654	0.345333	ADMIX	WM	0.0311884	0.33841	0.630402	ADMIX	WM	0.585557	0.0209258	0.393517	ADMIX	CM
Puntoža	Gordal Sevillana@Morchiaio	23.2422	E.1.1	E1.2	E1.1	G1	G2	SC deduced as mother according to chlorotype information	0.581334	0.00445671	0.414209	ADMIX	CM	0.447061	0.108445	0.444494	ADMIX	WM	0.384608	0.448984	0.166408	ADMIX	CM
Queixal de Porc	Gordal Sevillana@Sollana	29.681	0	E1.2	0	G1	dG2	SC stigmatic group deduced	0.521602	0.0393575	0.43904	ADMIX	WM	0.447061	0.108445	0.444494	ADMIX	WM	0.692702	0.307198	9.9991e-05	ADMIX	WM
Racimal	Gordal Sevillana@Lechín de Granada	28.5057	E1.1	E1.2	E1.1	G1	dG2	SC deduced as mother according to chlorotype information. SC stigmatic group deduced	9.999e-05	9.999e-05	0.9998	C	WM	0.447061	0.108445	0.444494	ADMIX	WM	0.189028	0.717782	0.0931903	ADMIX	WM
Rara de Cabra	Gordal Sevillana@Lechín de Granada	27.449	0	E1.2	E1.1	G1	dG2	SC stigmatic group deduced	9.999e-05	9.999e-05	0.9998	C	WM	0.447061	0.108445	0.444494	ADMIX	WM	0.189028	0.717782	0.0931903	ADMIX	WM
Reixonenca	Safrawi@Panseñera	40.4136	0	E1.1	0	G1	dG2	SC stigmatic group deduced	0.9998	9.999e-05	9.999e-05	A	WM	0.9998	9.999e-05	9.999e-05	A	EM	0.930027	0.0698734	9.9991e-05	A	WM
R'Khami	Chemlali Sfax@Abunara	26.7497	E1.2	E1.1	E1.2	dG1	dG2	SC deduced as mother according to chlorotype information. Stigmatic group of both parents deduced from other trios	0.103171	0.459468	0.437362	ADMIX	CM	9.999e-05	0.9998	9.999e-05	B	CM	0.45323	9.9991e-05	0.54667	ADMIX	CM
Roalejo de Arnedo	Toffehi Tataouine@Gordal Sevillana	26.4424	0	dE1.1	E1.2	dG2	G1	FC chlorotype deduced from other trios. Stigmatic group deduced	0.61465	9.9991e-05	0.38525	ADMIX	WM	0.774554	0.225346	9.9991e-05	A	CM	0.447061	0.108445	0.444494	ADMIX	WM
Rogeta	Claramunt@Verdal del Pallars	31.1301	0	0	0	G1	dG2	SC stigmatic group deduced	0.706782	9.9991e-05	0.293118	ADMIX	WM	0.938353	0.0615473	9.9991e-05	A	WM	0.613022	9.9991e-05	0.386878	ADMIX	WM
Roieta	Claramunt@Verdal del Pallars	32.5284	0	0	0	G1	dG2	SC stigmatic group deduced	0.85351	0.14639	9.9991e-05	A	WM	0.938353	0.0615473	9.9991e-05	A	WM	0.613022	9.9991e-05	0.386878	ADMIX	WM
Rotondella di Melfi	Gordal Sevillana@Lechín de Granada	27.2902	E.1.1	E1.2	E1.1	G1	dG2	SC deduced as mother according to chlorotype information. SC stigmatic group deduced	9.9991e-05	0.0504843	0.949416	C	CM	0.447061	0.108445	0.444494	ADMIX	WM	0.189028	0.717782	0.0931903	ADMIX	WM
Rowghani	Safrawi@Shengeh Manjil	31.2976	E1.1	E1.1	0	G1	dG2	SC stigmatic group deduced	0.889328	0.110572	9.9991e-05	A	EM	0.9998	9.999e-05	9.999e-05	A	EM	0.874709	0.101808	0.0234827	A	EM
Royal	Toffehi Tataouine@Gordal Sevillana	30.4182	E1	dE1.1	E1.2	dG2	G1	FC chlorotype deduced from other trios. Stigmatic group deduced	0.375108	9.9991e-05	0.624792	ADMIX	WM	0.774554	0.225346	9.9991e-05	A	CM	0.447061	0.108445	0.444494	ADMIX	WM
Royal de Sabiñán	Safrawi@Ayvalik	33.7749	dE1.1	E1.1	E1.1	G1	dG2	Off chlorotype deduced according to parents chlorotype information. SC stigmatic group deduced	0.846483	0.153417	9.9991e-05	A	WM	0.9998	9.999e-05	9.999e-05	A	EM	0.760587	0.173913	0.0654999	A	EM
Rufina	Farga@Penjoll	26.6926	dE3.1	E3.1	0	G1; ANDROEST	dG2	Off chlorotype deduced according to parents chlorotype and androesterility information. SC stigmatic group deduced	0.306878	0.451735	0.241387	ADMIX	WM	0.324548	0.503034	0.172418	ADMIX	WM	0.11503	0.411459	0.473511	ADMIX	WM
S:27_4	Azapa @Empeltre	20.6647	dE1.1	E1.1	E1.1	dG2	G1	Off chlorotype deduced according to parents chlorotype information. FC stigmatic group deduced	0.484572	0.184204	0.331224	ADMIX	WM	9.999e-05	9.999e-05	0.9998	C	WM	0.364114	0.479053	0.156833	ADMIX	WM
Safrawi-1116	Saifi@Safrawi	38.004	E1.1	0	E1.1	dG2	G1	FC stigmatic group deduced	0.891133	0.108767	9.9991e-05	A	EM	0.717684	0.020418	0.261898	ADMIX	EM	0.9998	9.999e-05	9.999e-05	A	EM
Salgar Redondo	Gordal Sevillana@Lechín de Granada	24.4875	0	E1.2	E1.1	G1	dG2	SC stigmatic group deduced	9.999e-05	9.999e-05	0.9998	C	WM	0.447061	0.108445	0.444494	ADMIX	WM	0.189028	0.717782	0.0931903	ADMIX	WM
Samanli	Gordal Sevillana@Gemlik	29.6088	0	E1.2	E1.1	G1	dG2	SC stigmatic group deduced	0.651304	9.9991e-05	0.348596	ADMIX	EM	0.447061	0.108445	0.444494	ADMIX	WM	0.735716	9.9991e-05	0.264184	ADMIX	EM
Samsun Salamuralik	Gordal Sevillana@Kotruvsi	27.3887	0	E1.2	0	G1	dG2	SC stigmatic group deduced	0.8384	9.9991e-05	0.1615	A	EM	0.447061	0.108445	0.444494	ADMIX	WM	0.880004	0.119896	9.9991e-05	A	CM
Samsun Tuzlamalik	Kothreiki@Gordal Sevillana	29.2075	0	E1.1	E1.2	dG2	G1	FC stigmatic group deduced	0.589138	9.9991e-05	0.410762	ADMIX	EM	0.9998	9.999e-05	9.999e-05	A	CM	0.447061	0.108445	0.444494	ADMIX	WM
Sandalio	Verdial de Badajoz@Galega Vulgar	34.8056	0	E1.1	E1.2	G2	dG1	SC stigmatic group deduced	0.248027	0.329785	0.422188	ADMIX	WM	9.9991e-05	0.0245247	0.975375	C	WM	9.9991e-05	0.208032	0.791868	C	WM
Santa Martinenga	Mansa@Cipresino	16.5811	E1.1	0	0	#N/A	#N/A		0.325988	0.246121	0.427891	ADMIX	CM	9.9991e-05	0.0718044	0.928096	C	WM	0.374323	0.320204	0.305473	ADMIX	CM
Sarrut	Claramunt@Verdal del Pallars	29.2847	0	0	0	G1	dG2	SC stigmatic group deduced	0.825445	9.9991e-05	0.174455	A	WM	0.938353	0.0615473	9.9991e-05	A	WM	0.613022	9.9991e-05	0.386878	ADMIX	WM
Sayfi	Saifi@Safrawi	31.9874	0	0	E1.1	dG2	G1	FC stigmatic group deduced	0.902451	0.0496536	0.0478955	A	EM	0.717684	0.020418	0.261898	ADMIX	EM	0.9998	9.999e-05	9.999e-05	A	EM
Sebhawy	Gordal Sevillana@Lechín de Granada	23.9788	E1.1	E1.2	E1.1	G1	dG2	SC deduced as mother according to chlorotype information. SC stigmatic group deduced	9.999e-05	9.999e-05	0.9998	C	EM	0.447061	0.108445	0.444494	ADMIX	WM	0.189028	0.717782	0.0931903	ADMIX	WM
Selection-1	Frantoio@Picual	23.79	dE1.1	E1.1	E1.1	G1	G2	Off chlorotype deduced according to parents chlorotype information	0.259985	0.487577	0.252438	ADMIX	WM	0.129238	0.870662	9.9991e-05	B	CM	0.0371273	9.9991e-05	0.962773	C	WM
Selection-2	Frantoio@Picual	26.8464	dE1.1	E1.1	E1.1	G1	G2	Off chlorotype deduced according to parents chlorotype information	0.347542	0.357134	0.295324	ADMIX	WM	0.129238	0.870662	9.9991e-05	B	CM	0.0371273	9.9991e-05	0.962773	C	WM
Selection-3	Frantoio@Picual	25.7761	dE1.1	E1.1	E1.1	G1	G2	Off chlorotype deduced according to parents chlorotype information	0.337879	0.570452	0.0916692	ADMIX	WM	0.129238	0.870662	9.9991e-05	B	CM	0.0371273	9.9991e-05	0.962773	C	WM
Selection-4	Frantoio@Picual	21.74	dE1.1	E1.1	E1.1	G1	G2	Off chlorotype deduced according to parents chlorotype information	0.466904	0.358432	0.174664	ADMIX	WM	0.129238	0.870662	9.9991e-05	B	CM	0.0371273	9.9991e-05	0.962773	C	WM
Selection-5	Arbosana@Chiquitita	31.9679	0	E1.1	0	G2	G1		0.475868	0.381685	0.142446	ADMIX	WM	0.158282	0.620154	0.221564	ADMIX	WM	0.575415	0.221102	0.203483	ADMIX	WM
Selection-6	Arbequina@Picual	23.9183	dE1.1	E1.1	E1.1	G1	G2	Off chlorotype deduced according to parents chlorotype information	0.399175	0.289219	0.311605	ADMIX	WM	0.354721	0.611333	0.0339462	ADMIX	WM	0.0371273	9.9991e-05	0.962773	C	WM
Selection-7	Arbequina@Picual	26.4104	dE1.1	E1.1	E1.1	G1	G2	Off chlorotype deduced according to parents chlorotype information	0.316422	0.356029	0.32755	ADMIX	WM	0.354721	0.611333	0.0339462	ADMIX	WM	0.0371273	9.9991e-05	0.962773	C	WM
Selection-8	Arbosana@Chiquitita	35.4957	0	E1.1	0	G2	G1		0.501903	0.35607	0.142027	ADMIX	WM	0.158282	0.620154	0.221564	ADMIX	WM	0.575415	0.221102	0.203483	ADMIX	WM
Semidana	Gordal Sevillana@Bosana	22.4425	E1.1	E1.2	E1.1	G1	G2	SC deduced as mother according to chlorotype information	0.478943	0.0261555	0.494902	ADMIX	CM	0.447061	0.108445	0.444494	ADMIX	WM	0.459328	0.540572	9.9991e-05	ADMIX	CM
Semni Djebeniana	Toffehi Tataouine@Dokkar	39.6322	0	dE1.1	E3	dG2	dG1	FC chlorotype deduced from other trios. Stigmatic group of both parents deduced from other trios	9.999e-05	0.9998	9.999e-05	B	CM	0.774554	0.225346	9.9991e-05	A	CM	9.999e-05	0.9998	9.999e-05	B	CM
Sennara	Toffahi@Chemlali Sfax	35.5464	0	E1.2	E1.1	dG2	dG1	Stigmatic group of both parents deduced from other trios	0.455623	0.295582	0.248795	ADMIX	EM	0.71625	0.198954	0.0847953	ADMIX	EM	9.999e-05	0.9998	9.999e-05	B	CM
Sevillenca	Patronet@Desconocido de Alcanadre_1	19.5701	E1.1	E3.1	0	#N/A	#N/A		0.301262	0.148917	0.549821	ADMIX	WM	0.455992	0.361968	0.18204	ADMIX	WM	0.00351243	0.394529	0.601959	ADMIX	WM
Shame	Zaity@Saifi	40.0889	E1.1	E1.2	0	dG1	dG2	Stigmatic group of both parents deduced from other trios	0.820881	0.0811574	0.0979612	A	EM	0.952956	0.0364355	0.0106081	A	EM	0.717684	0.020418	0.261898	ADMIX	EM
Sikitita_2	Arbequina@Picual	27.2707	dE1.1	E1.1	E1.1	G1	G2	Off chlorotype deduced according to parents chlorotype information	0.327095	0.395005	0.2779	ADMIX	WM	0.354721	0.611333	0.0339462	ADMIX	WM	0.0371273	9.9991e-05	0.962773	C	WM
Sinawy	Chemlali Sfax@Balady	26.7766	0	E1.1	E1.2	dG1	dG2	Stigmatic group of both parents deduced from other trios	0.188105	0.248951	0.562944	ADMIX	EM	9.999e-05	0.9998	9.999e-05	B	CM	0.734551	0.149336	0.116112	ADMIX	EM
Sinop no 6	Genovesa@Marantelli	17.2244	0	0	0	dG1	dG2	Stigmatic group of both parents deduced from other trios	0.431243	9.9991e-05	0.568657	ADMIX	EM	0.524185	0.104222	0.371593	ADMIX	WM	0.665524	9.9991e-05	0.334376	ADMIX	EM
Siurona	Morrut@Arbequina	33.8997	dE1.1	E1.1	E1.1	G2	G1	Off chlorotype deduced according to parents chlorotype information	0.648879	0.351021	9.9991e-05	ADMIX	WM	0.563763	0.370531	0.0657057	ADMIX	WM	0.354721	0.611333	0.0339462	ADMIX	WM
Souidi	Unknown OZ1@Dolce Agogia	19.9709	0	0	E1.1	dG1	G2	FC stigmatic group deduced	0.0115575	0.988343	9.9991e-05	B	CM	0.0330749	0.71375	0.253175	ADMIX	WM	0.231598	0.573349	0.195053	ADMIX	CM
Souri	Leccino@Picholine Marocaine	35.4582	E1.1	E1.1	E1.1	G1	G2		0.21796	0.244199	0.53784	ADMIX	EM	0.3057	0.619	0.0753007	ADMIX	CM	9.999e-05	9.999e-05	0.9998	C	WM
Tachuno	Gordal Sevillana@Lechín de Granada	26.0524	0	E1.2	E1.1	G1	dG2	SC stigmatic group deduced	9.9991e-05	0.0278296	0.97207	C	WM	0.447061	0.108445	0.444494	ADMIX	WM	0.189028	0.717782	0.0931903	ADMIX	WM
Tarabelsi	Jlot@Baladi	50.5364	dE1.1	E1.1	E1.1	dG1	G2	Off chlorotype deduced according to parents chlorotype information. FC stigmatic group deduced	0.996249	0.00365089	9.9991e-05	A	EM	0.9998	9.999e-05	9.999e-05	A	EM	0.839484	0.0215472	0.138969	A	EM
Tempranillo de Lucena	Gordal Sevillana@Lechín de Granada	25.595	E1.1	E1.2	E1.1	G1	dG2	SC deduced as mother according to chlorotype information. SC stigmatic group deduced	9.999e-05	9.999e-05	0.9998	C	WM	0.447061	0.108445	0.444494	ADMIX	WM	0.189028	0.717782	0.0931903	ADMIX	WM
Teta de la Vaca	Lechín de Sevilla@Picholine Marocaine	26.7802	0	E2.3	E1.1	G1	G2		0.359051	0.323658	0.317292	ADMIX	WM	0.0311884	0.33841	0.630402	ADMIX	WM	9.999e-05	9.999e-05	0.9998	C	WM
Tío Blas	Safrawi@Lechín de Granada	29.186	dE1.1	E1.1	E1.1	G1	dG2	Off chlorotype deduced according to parents chlorotype information. SC stigmatic group deduced	0.632066	0.217134	0.1508	ADMIX	WM	0.9998	9.999e-05	9.999e-05	A	EM	0.189028	0.717782	0.0931903	ADMIX	WM
Toruno	Gordal Sevillana@Lechín de Granada	23.1238	0	E1.2	E1.1	G1	dG2	SC stigmatic group deduced	9.999e-05	9.999e-05	0.9998	C	WM	0.447061	0.108445	0.444494	ADMIX	WM	0.189028	0.717782	0.0931903	ADMIX	WM
Tounsi Gafsa	Jemri Bouchouka@Nocellara del Belice	35.4196	E1.1	E1.1	E1.1	G1	G2		0.708591	0.183386	0.108023	ADMIX	CM	0.809987	0.132483	0.0575298	A	CM	0.628682	9.9991e-05	0.371218	ADMIX	CM
Tragolia	Koroneiki@Kalamon	24.4638	dE1.1	E1.1	E1.1	G1	G2	Off chlorotype deduced according to parents chlorotype information	0.556407	0.338611	0.104982	ADMIX	CM	0.0933616	0.865568	0.0410706	B	CM	0.39918	0.281158	0.319662	ADMIX	CM
Trylia	Safrawi@Ogliarola del Bradano	29.135	E1.1	E1.1	E1.1	G1	dG2	SC stigmatic group deduced	0.749779	0.250121	9.9991e-05	ADMIX	EM	0.9998	9.999e-05	9.999e-05	A	EM	9.9991e-05	0.854337	0.145563	B	CM
Ulliri Shekullor Berat	Safrawi@Ogliarola del Bradano	28.3001	dE1.1	E1.1	E1.1	G1	dG2	Off chlorotype deduced according to parents chlorotype information. SC stigmatic group deduced	0.301846	0.551638	0.146516	ADMIX	CM	0.9998	9.999e-05	9.999e-05	A	EM	9.9991e-05	0.854337	0.145563	B	CM
Unknown OT2	Blanqueta@Rougette de Metidja-2500	41.0397	E1.1	E1.3	0	#N/A	#N/A		0.274739	0.725161	9.9991e-05	ADMIX	WM	0.442039	0.493199	0.0647625	ADMIX	WM	0.0559338	0.850843	0.0932234	B	CM
Urgavona	Frantoio@Arbosana	37.3937	dE1.1	E1.1	E1.1	G1	G2	Off chlorotype deduced according to parents chlorotype information	0.308065	0.436292	0.255643	ADMIX	WM	0.129238	0.870662	9.9991e-05	B	CM	0.158282	0.620154	0.221564	ADMIX	WM
Valanolia	Safrawi@Nocellara del Belice	27.6626	E1.1	E1.1	E1.1	G1	G2		0.806776	0.02838	0.164844	A	CM	0.9998	9.999e-05	9.999e-05	A	EM	0.628682	9.9991e-05	0.371218	ADMIX	CM
Vallesa	Morrut@Farga	29.5056	E3.1	E1.1	E3.1	G2	G1; ANDROEST	SC deduced as mother according to chlorotype and androesterility information	0.253325	0.472437	0.274238	ADMIX	WM	0.563763	0.370531	0.0657057	ADMIX	WM	0.324548	0.503034	0.172418	ADMIX	WM
Velika Lastovka	Gordal Sevillana@Morchiaio	28.9258	E1.1	E1.2	E1.1	G1	G2	SC deduced as mother according to chlorotype information	0.487163	9.9991e-05	0.512737	ADMIX	CM	0.447061	0.108445	0.444494	ADMIX	WM	0.384608	0.448984	0.166408	ADMIX	CM
Verdal de Barcedana	Claramunt@Verdal del Pallars	34.5962	0	0	0	G1	dG2	SC stigmatic group deduced	0.729064	9.9991e-05	0.270836	ADMIX	WM	0.938353	0.0615473	9.9991e-05	A	WM	0.613022	9.9991e-05	0.386878	ADMIX	WM
Verdal de Figols	Toffehi Tataouine@Safrawi	36.2766	dE1.1	dE1.1	E1.1	dG2	G1	Off chlorotype deduced according to parents chlorotype information. FC chlorotype deduced from other trios. FC stigmatic group deduced	0.877378	0.122522	9.9991e-05	A	WM	0.774554	0.225346	9.9991e-05	A	CM	0.9998	9.999e-05	9.999e-05	A	EM
Verdal de Leza	Toffehi Tataouine@Gordal Sevillana	22.2759	0	dE1.1	E1.2	dG2	G1	FC chlorotype deduced from other trios. Stigmatic group deduced	0.468526	9.9991e-05	0.531374	ADMIX	WM	0.774554	0.225346	9.9991e-05	A	CM	0.447061	0.108445	0.444494	ADMIX	WM
Verdal de Manresa	Gordal Sevillana@Vera	27.7487	E3.1	E1.2	E3.1	G1	G2, ANDROEST	SC deduced as mother according to chlorotype and androesterility information	0.585752	0.0354001	0.378848	ADMIX	WM	0.447061	0.108445	0.444494	ADMIX	WM	0.471324	0.515557	0.0131185	ADMIX	WM
Verdala	Gordal Sevillana@Lechín de Granada	24.6344	E1.1	E1.2	E1.1	G1	dG2	SC deduced as mother according to chlorotype information. SC stigmatic group deduced	9.999e-05	9.999e-05	0.9998	C	WM	0.447061	0.108445	0.444494	ADMIX	WM	0.189028	0.717782	0.0931903	ADMIX	WM
Verdial de Alcalá la Real	Gordal Sevillana@Lechín de Granada	24.9097	0	E1.2	E1.1	G1	dG2	SC stigmatic group deduced	9.999e-05	9.999e-05	0.9998	C	WM	0.447061	0.108445	0.444494	ADMIX	WM	0.189028	0.717782	0.0931903	ADMIX	WM
Verdial de Badajoz	Gordal Sevillana@Lechín de Granada	26.0427	E1.1	E1.2	E1.1	G1	dG2	SC deduced as mother according to chlorotype information. SC stigmatic group deduced	9.9991e-05	0.0245247	0.975375	C	WM	0.447061	0.108445	0.444494	ADMIX	WM	0.189028	0.717782	0.0931903	ADMIX	WM
Verdial de Vélez-Málaga-51	Cornezuelo de Jaén@Picual	32.0347	E1	E1.1	E1.1	G1	G2		0.454767	0.0197575	0.525476	ADMIX	WM	0.423954	0.0352445	0.540801	ADMIX	WM	0.0371273	9.9991e-05	0.962773	C	WM
Vidrillo	Gordal Sevillana@Lechín de Granada	22.4363	0	E1.2	E1.1	G1	dG2	SC stigmatic group deduced	0.040082	9.9991e-05	0.959818	C	WM	0.447061	0.108445	0.444494	ADMIX	WM	0.189028	0.717782	0.0931903	ADMIX	WM
Villalonga	Genovesa@Otos_1	18.4363	E1.3	0	0	dG1	dG2	Stigmatic group of both parents deduced from other trios	0.550961	0.226273	0.222766	ADMIX	WM	0.524185	0.104222	0.371593	ADMIX	WM	0.363882	0.112	0.524118	ADMIX	WM
VS6	Dokkar@Picholine Marocaine	34.9833	E1.1	E3	E1.1	dG1	G2	SC deduced as mother according to chlorotype information. FC stigmatic group deduced	9.9991e-05	0.648433	0.351467	ADMIX	WM	9.999e-05	0.9998	9.999e-05	B	CM	9.999e-05	9.999e-05	0.9998	C	WM
Wardan	Chemlali Sfax@Balady	27.7223	E1.1	E1.1	E1.2	dG1	dG2	FC deduced as mother according to chlorotype information. Stigmatic group of both parents deduced from other trios	0.43059	0.310692	0.258718	ADMIX	EM	9.999e-05	0.9998	9.999e-05	B	CM	0.734551	0.149336	0.116112	ADMIX	EM
Yag Celebi (Tatayn)	Zaity@Belluti	48.9168	0	E1.2	E1.1	dG1	dG2	Stigmatic group of both parents deduced from other trios	0.741415	0.0424036	0.216182	ADMIX	EM	0.952956	0.0364355	0.0106081	A	EM	0.766572	0.233328	9.9991e-05	A	EM
Zada	Zaity@Saifi	47.195	0	E1.2	0	dG1	dG2	Stigmatic group of both parents deduced from other trios	0.87	0.1299	9.9991e-05	A	EM	0.952956	0.0364355	0.0106081	A	EM	0.717684	0.020418	0.261898	ADMIX	EM
Zeitoun Boubezzoula	Jeddari Chaal@Olivastra Seggianese	27.9265	0	0	E1.1	dG2	dG1	Stigmatic group of both parents deduced from other trios	9.999e-05	0.9998	9.999e-05	B	CM	9.999e-05	0.9998	9.999e-05	B	CM	9.9991e-05	0.857491	0.142409	B	CM
